# Supplementary material
Source: publisher figshare collection journal article supplement (https://geolsoc.figshare.com/ndownloader/files/25610221)
Supplement: Supplementary file 1 [file 25610221]

## Sheet: S1_1 Geochem. data Bransfield
Table S1-1: Whole rock chemical analyses of South Shetland Islands and Bransfield Rift rock samples- Bibliographic data for Figure 3
		WGS84 Lat/Long (Decimal Degrees)						wt%																ppm
Sample	Reference	Latitude_min	Latitude_max	Longitude_min	Longitude_max	Location_comment	Classification	SiO2	TiO2	Al2O3	Fe2O3	FeO	MnO	MgO	CaO	Na2O	K2O	P2O5	H2O-	H2O+	CO2	Total	LOI	Ag	As	Au	Ba	Be	Bi	Cd	Ce	Co	Cr	Cs	Cu	Dy	Er	Eu	Ga	Gd	Ge	Hf	Ho	La	Li	Lu	Mo	Nb	Nd
6	Birkenmajer et al. (1981)	-62.25	-62.25	-58.5	-58.5	inner Admiralty Bay, Ezcurra Inlet, Arctowski Cove, Rakusa Point Formation	South Shetland Islands	53.9	0.84	17.8	2.06	4.21	0.18	5.08	8.52	3.55	0.68	0.17			0.28	97.27	0.28				270					36	17		220
10	Birkenmajer et al. (1981)	-62.25	-62.25	-58.5	-58.5	inner Admiralty Bay, Ezcurra Inlet, Arctowski Cove, Skua Cliff Formation	South Shetland Islands	51.7	0.84	20.2	3.94	4.3	0.14	3.79	9.68	3.41	0.39	0.15			0.19	98.73	0.19				180					44	12		290
12	Birkenmajer et al. (1981)	-62.25	-62.25	-58.5	-58.5	inner Admiralty Bay, Jardine Peak	South Shetland Islands	55.4	0.7	16.7	3.02	3.27	0.1	5.46	8.42	3.52	0.76	0.1			0.28	97.73	0.28				170					33	120		105
19	Birkenmajer et al. (1981)	-62.25	-62.25	-58.5	-58.5	inner Admiralty Bay, Ezcurra Inlet, Arctowski Cove, Skua Cliff Formation	South Shetland Islands	49	0.84	20.3	4.36	4.14	0.24	5.05	8.94	3.71	0.2	0.14			0.29	97.21	0.29				160					37	12		290
20	Birkenmajer et al. (1981)	-62.25	-62.25	-58.5	-58.5	inner Admiralty Bay, Ezcurra Inlet, Arctowski Cove, Hala Formation	South Shetland Islands	57	0.79	17.5	3.02	3.3	0.13	4.03	7.12	3.73	1.6	0.2			0.25	98.67	0.25				300					38	20		170
27	Birkenmajer et al. (1981)	-62.25	-62.25	-58.5	-58.5	inner Admiralty Bay, Herve Cove	South Shetland Islands	54.7	0.65	17.4	3.09	3.49	0.12	3.9	7.3	3.73	0.43	0.18			0.44	95.43	0.44				300					32	10		180
32	Birkenmajer et al. (1981)	-62.25	-62.25	-58.5	-58.5	inner Admiralty Bay, Jersak Hills	South Shetland Islands	57	0.78	16.9	2.2	4.86	0.13	3.25	7.06	3.78	1.6	0.19			0.27	98.02	0.27				340					45	10		200
34	Birkenmajer et al. (1981)	-62.25	-62.25	-58.5	-58.5	inner Admiralty Bay, Baranowski Glacier, Llano Point Formation	South Shetland Islands	53.6	1.43	15.7	4.35	5.58	0.15	3.94	7.92	3.51	1.17	0.31			1.08	98.74	1.08				230					35	8		390
41	Birkenmajer et al. (1981)	-62.25	-62.25	-58.5	-58.5	inner Admiralty Bay, Jersak Hills	South Shetland Islands	55.1	1.12	17.3	4.49	3.8	0.18	3.28	7.78	3.62	1.12	0.19			0.45	98.43	0.45				300					36	8		255
48	Birkenmajer et al. (1981)	-62.25	-62.25	-58.5	-58.5	inner Admiralty Bay, Paradise Cove, Uchatka Point Formation	South Shetland Islands	40.7	0.92	10.3	4.04	2.98	0.14	2.05	10.8	3.3	0.79	0.12			2	78.14	2				220					37	30		80
54	Birkenmajer et al. (1981)	-62.25	-62.25	-58.5	-58.5	inner Admiralty Bay, Point Hennequin	South Shetland Islands	59.5	0.83	17.3	3.37	2.51	0.13	1.92	5.94	4.42	2	0.2			0.91	99.03	0.91				440					38	14		60
62	Birkenmajer et al. (1981)	-62.25	-62.25	-58.5	-58.5	inner Admiralty Bay, Dufayel Island, Dalmor Bank Formation	South Shetland Islands	55	0.78	17.9	2.63	4.34	0.13	3.6	7.43	3.23	1.5	0.19			1.38	98.11	1.38				360					43	16		170
75	Birkenmajer et al. (1981)	-62.25	-62.25	-58.5	-58.5	inner Admiralty Bay, Herve Cove	South Shetland Islands	62.8	0.8	14.4	1.92	4.32	0.17	2.85	3.8	5.25	0.48	0.2			0.51	97.5	0.51				45					50	10		210
81	Birkenmajer et al. (1981)	-62.25	-62.25	-58.5	-58.5	inner Admiralty Bay, Dufayel Island, Dalmor Bank Formation	South Shetland Islands	44	0.82	17.6	1.75	6.19	0.18	4.36	9.9	2.52	0.78	0.17			6.36	94.63	6.36				200					40	25		235
01C	Birkenmajer et al. (1981)	-62.25	-62.25	-58.5	-58.5	inner Admiralty Bay, Ezcurra Inlet, Point Thomas Formation	South Shetland Islands	48.8	0.78	20.3	4.5	3.04	0.23	4.98	9.96	3.16	0.18	0.09			0.45	96.47	0.45				170					31	27		300
29A	Birkenmajer et al. (1981)	-62.25	-62.25	-58.5	-58.5	inner Admiralty Bay, Sphinx Hill	South Shetland Islands	73.2	0.5	12.9	0.6	2.14	0.07	0.63	1.86	4.01	2.32	0.09			0.33	98.65	0.33				730					17	4		5
33A	Birkenmajer et al. (1981)	-62.25	-62.25	-58.5	-58.5	inner Admiralty Bay, Paradise Cove, Demay Point Formation	South Shetland Islands	80.7	0.14	9.6	1.21	0.28	0.03	0.09	0.8	3.13	2.94	0.02			0.67	99.61	0.67				1100					24	2		9
39A	Birkenmajer et al. (1981)	-62.25	-62.25	-58.5	-58.5	inner Admiralty Bay, Jersak Hills	South Shetland Islands	56.1	1.11	15.7	3.63	4.77	0.16	2.98	6.58	4.31	1.34	0.36			0.31	97.35	0.31				380					28	6		100
43A	Birkenmajer et al. (1981)	-62.25	-62.25	-58.5	-58.5	inner Admiralty Bay, Baranowski Glacier, Llano Point Formation	South Shetland Islands	54.3	1.24	16.7	4.07	4.45	0.15	3.22	7.82	3.82	0.73	0.24			0.25	96.99	0.25				280					28	10		230
60C	Birkenmajer et al. (1981)	-62.25	-62.25	-58.5	-58.5	inner Admiralty Bay, Ezcurra Inlet, Point Thomas Formation	South Shetland Islands	47.9	0.91	18	4.87	3.81	0.2	6.05	9.57	3.51	0.23	0.16			0.32	95.53	0.32				165					45	65		150
61B	Birkenmajer et al. (1981)	-62.25	-62.25	-58.5	-58.5	inner Admiralty Bay, Dufayel Island, Gdynia Point Formation	South Shetland Islands	54.9	0.71	17.3	2.35	4	0.11	3.41	6.53	3.46	0.52	0.17			3.14	96.6	3.14				210					28	8		130
87A	Birkenmajer et al. (1981)	-62.25	-62.25	-58.5	-58.5	inner Admiralty Bay, Paradise Cove, Demay Point Formation	South Shetland Islands	64.1	0.67	14.8	5.06	0.79	0.1	0.48	2.72	4.35	2.55	0.13			1.88	97.63	1.88				690					16	5		17
93	Birkenmajer et al. (1985)	-62	-62	-58.27	-58.5	inner Admiralty Bay, Martel Inlet, Keller Peninsula, Visca Anchorage	South Shetland Islands	51.3	0.63	17.6	4.34	3.87	0.14	3.24	7.02	2.58	0.83	0.22			5.76	97.53	5.76				300					33	21		100
94	Birkenmajer et al. (1985)	-62	-62	-58.27	-58.5	inner Admiralty Bay, martel Inlet, Domeyko Glacier	South Shetland Islands	53.6	0.72	19.7	3.31	3.69	0.16	2.71	6.06	3.12	1.1	0.29			2.34	96.8	2.34				330					21	10		140
95	Birkenmajer et al. (1985)	-62	-62	-58.27	-58.5	inner Admiralty Bay, Martel Inlet, Ullman Spur	South Shetland Islands	66.8	0.53	15.5	3.24	0.9	0.07	1	3.53	4.8	1.79	0.23			1.06	99.45	1.06				1080					19	5		21
98	Birkenmajer et al. (1985)	-62	-62	-58.27	-58.5	inner Admiralty Bay, Martel Inlet, Keller Peninsula	South Shetland Islands	55.4	0.79	17.9	3.47	3.21	0.13	2.07	6.61	3.82	1.05	0.46			3.63	98.54	3.63				370					18	5		48
101	Birkenmajer et al. (1985)	-62	-62	-58.27	-58.5	inner Admiralty Bay, Martel Inlet, Keller Peninsula	South Shetland Islands	57.3	0.79	16	2.52	3.21	0.19	1.67	5.62	4.64	1.47	0.37			2.93	96.71	2.93				920					12	5		31
105	Birkenmajer et al. (1985)	-62	-62	-58.27	-58.5	inner Admiralty Bay, Martel Inlet, Keller Peninsula	South Shetland Islands	48.9	1.01	18	4.38	5.03	0.23	3.36	6.46	1.72	1.01	0.44			3.77	94.31	3.77				280					24	22		160
111	Birkenmajer et al. (1985)	-62	-62	-58.27	-58.5	inner Admiralty Bay, Martel Inlet, Keller Peninsula, Visca Anchorage	South Shetland Islands	53.1	0.64	19	3.64	3.61	0.14	3.49	6.85	4.26	0.57	0.23			2.38	97.91	2.38				260					22	12		135
119	Birkenmajer et al. (1985)	-62	-62	-58.27	-58.5	inner Admiralty Bay, martel Inlet, Domeyko Glacier	South Shetland Islands	57	0.67	18.1	4.42	2.33	0.13	1.99	3.78	5.86	1.32	0.21			1.67	97.48	1.67				160					17	11		170
120	Birkenmajer et al. (1985)	-62	-62	-58.27	-58.5	inner Admiralty Bay, martel Inlet, Domeyko Glacier	South Shetland Islands	58.3	0.45	16.7	3.51	2.45	0.07	2.85	6.12	2.82	1.87	0.14			2.74	98.02	2.74				560					22	12		18
131	Birkenmajer et al. (1985)	-62	-62	-58.27	-58.5	inner Admiralty Bay, Martel Inlet, Ullman Spur	South Shetland Islands	61.9	0.72	16.6	2.95	2.49	0.12	1.94	2.79	5.3	2.83	0.32			0.33	98.29	0.33				520					15	12		32
132	Birkenmajer et al. (1985)	-62	-62.05	-58.27	-58.5	inner Admiralty Bay, Martel Inlet, Goetel Glacier	South Shetland Islands	48.8	0.84	19.5	4.99	3.61	0.17	4.06	5.74	4.64	1.65	0.28			2.33	96.61	2.33				410					34	18		250
224	Birkenmajer et al. (1985)	-62.05	-62.05	-58.4	-58.4	inner Admiralty Bay, Wegger Peak Group	South Shetland Islands	54	0.69	18.6	4.51	3.68	0.14	4.04	7.46	4.02	1.42	0.25			0.23	99.04	0.23				330					24	20		150
226	Birkenmajer et al. (1985)	-62.05	-62.05	-58.4	-58.4	inner Admiralty Bay, Wegger Peak Group	South Shetland Islands	54.4	0.62	17.8	4.31	3.43	0.15	4.29	6.53	3.9	1.95	0.21			0.28	97.87	0.28				360					31	25		150
227	Birkenmajer et al. (1985)	-62.05	-62.05	-58.4	-58.4	inner Admiralty Bay, Wegger Peak Group	South Shetland Islands	52.5	0.94	17.8	5.79	3.59	0.17	4.21	8.14	3.42	1.26	0.27			0.17	98.26	0.17				245					37	20		130
233	Birkenmajer et al. (1985)	-62.05	-64.2	-58.4	-58.4	inner Admiralty Bay, Wegger Peak Group	South Shetland Islands	57.2	0.74	18.1	4.34	3.41	0.15	3.11	6.09	3.08	1.87	0.15			0.88	99.12	0.88				300					26	10		5
234	Birkenmajer et al. (1985)	-62.05	-62.05	-58.4	-58.4	inner Admiralty Bay, Wegger Peak Group	South Shetland Islands	54	0.53	17	4.08	3.62	0.14	5.1	9.05	3.74	1.95	0.18			0.15	99.54	0.15				280					34	135		115
240	Birkenmajer et al. (1985)	-62.05	-62.05	-58.4	-58.4	inner Admiralty Bay, Cardozo Cove, Znosko Glacier, Znosko Glacier Formation	South Shetland Islands	55.6	0.71	17.2	4.02	3.45	0.13	4.05	4.89	4.12	2.42	0.23			0.38	97.2	0.38				380					31	17		190
242	Birkenmajer et al. (1985)	-62.05	-62.05	-58.4	-58.4	inner Admiralty Bay, Cardozo Cove, Znosko Glacier, Znosko Glacier Formation	South Shetland Islands	53.5	0.6	18	3.98	3.62	0.14	4.92	4.85	4.12	0.72	0.19			2.49	97.13	2.49				80					30	60		88
244	Birkenmajer et al. (1985)	-62.05	-62.05	-58.4	-58.4	inner Admiralty Bay, cardozo Cove, Admiralen Peak	South Shetland Islands	55.5	0.56	18.1	3.63	3.46	0.13	3.52	7.43	2.94	1.7	0.16			1.01	98.14	1.01				340					29	18		165
A140	Birkenmajer et al. (1991)	-62.05	-62.05	-58.4	-58.4	Point Hennequin, Admiralty Bay Group	South Shetland Islands	62.57	0.82	16.68	2.72	3.55	0.12	2.47	6.5	3.43	0.81	0.26				103.29	3.36																									11
A141	Birkenmajer et al. (1991)	-62.05	-62.05	-58.4	-58.4	Point Hennequin, Vieville Glacier Formation	South Shetland Islands	61.94	0.79	16.47	4.67	2.03	0.11	2.42	5.16	3.85	2.3	0.2				101.23	1.29				312				49	18	23					1.4				5.4		22.8		0.37		3	28
A144	Birkenmajer et al. (1991)	-62.05	-62.05	-58.4	-58.4	Mount Wawel, Point Hennequin Group	South Shetland Islands	56.59	0.77	17.9	3.83	3.77	0.12	4.12	7.72	3.56	1.27	0.27				101.18	1.26				196				36	25.6	45					1.4				3.3		15.1		0.29		2	26.6
A155	Birkenmajer et al. (1991)	-62.05	-62.05	-58.4	-58.4	Low Head, Cape Syrezol Group	South Shetland Islands	49.83	0.77	16.6	3.07	5.3	0.15	12.53	8.53	2.73	0.38	0.05				102.01	2.07				106				11.7	46	1014					0.81				1.5		5.2		0.32		11	8.7
A179	Birkenmajer et al. (1991)	-62.05	-62.05	-58.4	-58.4	Dunikowski Ridge, Legru Bay, Dunikowski Ridge Formation	South Shetland Islands	53.11	0.83	18.23	3.93	4.15	0.15	6.34	9.11	3.29	0.71	0.06				101.8	1.89				183				19.6	31	239					1.1				1.8		7.8		0.24		5	15.2
A195	Birkenmajer et al. (1991)	-62.05	-62.05	-58.4	-58.4	Brama, Baranowski Glacier Group	South Shetland Islands	56.63	0.7	17.41	2.67	3.55	0.14	5.09	9.74	3.21	0.72	0.06				103.3	3.38				165				16.9	26	271					0.96				1.9		7.4		0.25		7	9.4
A200	Birkenmajer et al. (1991)	-62.05	-62.05	-58.4	-58.4	Point Thomas, Point Thomas Formation	South Shetland Islands	52.62	0.78	20.52	4.54	3.44	0.14	4.12	9.72	3.26	0.69	0.11				101.28	1.34				108				21.1	23	19					1.1				2		8.3		0.3		6	16
A201	Birkenmajer et al. (1991)	-62.05	-62.05	-58.4	-58.4	Ragusa Point, Admiralty Bay Group	South Shetland Islands	64.87	0.82	16.04	2.39	3.14	0.11	1.39	4.5	4.01	2.41	0.26				103.3	3.36																									5
A202	Birkenmajer et al. (1991)	-62.05	-62.05	-58.4	-58.4	Rakusa Point, Ezcurra Inlet Group	South Shetland Islands	58.21	0.81	17.44	3.61	3.87	0.13	3.8	6.67	3.42	1.79	0.18				100.74	0.81				252				46.4	24	32					1.5				4.4		19.7		0.32		5	26.8
A221	Birkenmajer et al. (1991)	-62.05	-62.05	-58.4	-58.4	Martins Head, Legru Bay, Dunikowski Ridge Formation	South Shetland Islands	53.94	0.76	19.82	4.27	3.47	0.15	3.92	8.89	3.72	0.84	0.18				101.05	1.09				149				21.8	23	71					1.2				2.2		9.9		0.45		5	14.8
A224	Birkenmajer et al. (1991)	-62.05	-62.05	-58.4	-58.4	Wegger Peak	South Shetland Islands	56.75	0.66	19.35	3.45	3.24	0.11	3.06	7.48	4.04	1.57	0.2				101.32	1.41				286				50.9	22.3	27					1.8				3.2		21		0.3		4	28.8
A250	Birkenmajer et al. (1991)	-62.05	-62.05	-58.4	-58.4	Jardine Peak, Admiralty Bay Group	South Shetland Islands	58.04	0.67	17.13	3.32	3.23	0.12	5.34	7.77	3.31	0.93	0.08				101.2	1.26				225				20.7	23	157					0.9				2.2		10.3		0.36		2	11
A369	Birkenmajer et al. (1991)	-62.05	-62.05	-58.4	-58.4	Barton Buttress, Martel Inlet Group	South Shetland Islands	59.06	0.77	18.09	3.44	3.54	0.13	3.1	6.75	4.45	0.45	0.17				104.08	4.13				215				45.8	20	26					1.7				4.4		19.3		0.43		4	29
A451	Birkenmajer et al. (1991)	-62.05	-62.05	-58.4	-58.4	Dufayel Island, Dufayel Island Group	South Shetland Islands	51.52	0.94	19.28	2.93	6.36	0.24	4.66	6.79	1.94	5.09	0.2				108.07	8.12				376				38.1	28	34					1.3				3.5		15.4		0.44		2	24
A452	Birkenmajer et al. (1991)	-62.05	-62.05	-58.4	-58.4	Dufayel Island, Gdynia Point, Cardozo Cove Group	South Shetland Islands	55.06	0.94	18.63	4.03	4.25	0.16	3.07	6.37	2.55	4.59	0.28				103.21	3.28				474				46	20	11					1.6				3.8		21.6		0.4		5	32
A500	Birkenmajer et al. (1991)	-62.05	-62.05	-58.4	-58.4	Noel Hill	South Shetland Islands	57.33	0.7	17.93	3.19	3.64	0.16	4.01	7.41	4.1	1.36	0.13				101.14	1.18				242				29.2	26	27					1.3				2.7		14.3		0.38		4	20
A677	Birkenmajer et al. (1991)	-62.05	-62.05	-58.4	-58.4	Magda nunatak, Mazurek Point Formation	South Shetland Islands	52.32	0.8	16.42	5.61	3.15	0.19	9.33	9.18	2.62	0.21	0.11				103.69	3.75				113				20.2	39	682					0.97				2		8.5		0.21		8	11.9
19.1	De Almeida et al. (2000)	-62.5417	-62.5667	-59.5417	-59.625	Fort Point	South Shetland Islands	56.22	0.45	17.1	6.7		0.12	4.78	8.54	2.95	1.05	0.2				100.07	1.96				263				24.15					2.15	1.39	0.71		2.65		2.91	0.44	12.11		0.22		2.6	11.3
20	De Almeida et al. (2000)	-62.5417	-62.5667	-59.5417	-59.625	Fort Point	South Shetland Islands	63.72	0.48	15.77	5.16		0.12	2.04	4.39	4.02	2.06	0.13				99.06	1.17				405				34.86					3.13	1.95	0.98		3.66		4.14	0.64	17.39		0.34		4.32	16.2
26.3	De Almeida et al. (2000)	-62.5417	-62.5667	-59.5417	-59.625	Fort Point	South Shetland Islands	53.33	0.59	19.29	7.8		0.19	4.74	9.16	3.06	0.36	0.09				100.05	1.44				100				12.14					2.08	1.32	0.77		2.11		1.09	0.45	5.63		0.23		0.94	7.65
28.3	De Almeida et al. (2000)	-62.5417	-62.5667	-59.5417	-59.625	Fort Point	South Shetland Islands	53.95	0.78	18.87	8.49		0.16	4.57	9.2	2.95	0.2	0.11				99.87	0.59				112				11.65					3.13	1.93	0.88		2.73		1.61	0.61	5		0.31		1.43	8.17
8.2A	De Almeida et al. (2000)	-62.5417	-62.5667	-59.5417	-59.625	Fort Point	South Shetland Islands	57.26	0.78	16.42	7.59		0.13	3.21	7.05	3.47	1.59	0.18				98.42	0.74				345				40.42					4.51	2.83	1.14		4.97		6.4	0.9	18.81		0.44		5.28	20.9
HA16.2A	De Almeida et al. (2000)	-62.5417	-62.5667	-59.5417	-59.625	Fort Point	South Shetland Islands	76.26	0.2	11.33	1.31		0.02	0.17	0.34	2.46	5.91	0.02				98.41	0.39				936.9				20.57					1.84	1.35	0.875		1.94		3.78	0.4	10.79		0.298		3.34	8.56
HA16.2B	De Almeida et al. (2000)	-62.5417	-62.5667	-59.5417	-59.625	Fort Point	South Shetland Islands	54.36	0.83	17.98	8.08		0.11	3.24	7.64	3.76	0.6	0.21				98.25	1.44				235				33.26					4.62	2.66	1.35		4.86		3.02	0.88	15.58		0.42		3.42	18.4
HA17.2A	De Almeida et al. (2000)	-62.5417	-62.5667	-59.5417	-59.625	Fort Point	South Shetland Islands	55.99	0.61	17.4	7.46		0.14	3.89	7.26	3.67	1.05	0.13				99.09	1.49				263				24.71					2.71	1.61	0.88		2.86		2.68	0.52	12.25		0.28		2.97	12.6
HA18.1	De Almeida et al. (2000)	-62.5417	-62.5667	-59.5417	-59.625	Fort Point	South Shetland Islands	63.4	0.5	16.31	5.25		0.13	2.05	4.75	4.19	1.75	0.15				100.01	1.53				443				33.5					3.09	1.87	1.01		3.68		3.74	0.61	17.11		0.33		14.24	16.2
HA23.2	De Almeida et al. (2000)	-62.5417	-62.5667	-59.5417	-59.625	Fort Point	South Shetland Islands	56.7	0.61	17.47	8.45		0.13	3.62	7.44	3.63	0.68	0.03				99.74	0.98				275				24.65					4.96	2.86	1.21		4.39		3.15	1.02	11.25		0.47		2.67	15.9
HA28.1	De Almeida et al. (2000)	-62.5417	-62.5667	-59.5417	-59.625	Fort Point	South Shetland Islands	68.6	0.28	15.78	3.41		0.08	1.61	4.95	4.06	0.6	0.08				100.47	1.02				351				22.85					1.34	0.8	0.64		1.81		2.11	0.26	13.42		0.16		2	8.8
HA7.3	De Almeida et al. (2000)	-62.5417	-62.5667	-59.5417	-59.625	Fort Point	South Shetland Islands	57.93	0.69	15.95	8.09		0.15	3.3	6.25	4.31	1.21	0.18				98.55	0.49				385				32.8					4.28	2.62	1.19		4.58		2.9	0.89	16.07		0.42		4.06	17.8
HA8.1.1	De Almeida et al. (2000)	-62.5417	-62.5667	-59.5417	-59.625	Fort Point	South Shetland Islands	57.99	0.75	16.36	7.26		0.13	3.07	6.61	3.66	1.79	0.15				98.56	0.79				349				34.24					3.94	2.38	1.08		4.34		6.36	0.79	16.58		0.41		5.48	16.9
HA9.1	De Almeida et al. (2000)	-62.5417	-62.5667	-59.5417	-59.625	Fort Point	South Shetland Islands	57.46	0.87	16.1	7.66		0.15	3.28	6.44	3.49	1.83	0.18				98.61	1.15				381				42.77					4.52	2.72	1.2		5.25		5.13	0.88	21.02		0.42		6.41	21.2
AF-12A	De Almeida et al. (2003)	-62.1417	-62.2292	-58.85	-59.0083	Fildes Peninsula	South Shetland Islands	50.34	0.74	21.98	8.29		0.14	3.34	10.06	2.93	0.27	0.11				102.71	4.51				109				10.27					2.06	1	0.738		1.82		1	0.42	4.63		0.244		1	7.4
AF-14	De Almeida et al. (2003)	-62.1417	-62.2292	-58.85	-59.0083	Fildes Peninsula	South Shetland Islands	50.14	0.84	19.89	9.64		0.18	4.31	9.97	3.31	0.57	0.13				99.99	1.01				149				14					2.34	1.27	0.921		2.36		1	0.45	6.45		0.2		1	9.68
AF-16A	De Almeida et al. (2003)	-62.1417	-62.2292	-58.85	-59.0083	Fildes Peninsula	South Shetland Islands	52.64	0.71	20.64	7.96		0.14	4.25	10.39	1.84	0.4	0.12				99.2	0.11				151				16.6							1.02				2		7.2		0.19		2	13
AF-16B	De Almeida et al. (2003)	-62.1417	-62.2292	-58.85	-59.0083	Fildes Peninsula	South Shetland Islands	48.41	0.85	21.43	6.33		0.11	2.65	13.83	1.75	0.07	0.15				100.24	4.66				188				16.38							1.18				2		10.5		0.24		2	16
AF-20	De Almeida et al. (2003)	-62.1417	-62.2292	-58.85	-59.0083	Fildes Peninsula	South Shetland Islands	49.15	0.83	21.13	9.35		0.12	3.04	10.07	3.12	0.35	0.13				100.75	3.46				139				13.11					2.56	1.36	0.9		2.17		1	0.48	6.005		0.233		1	8.87
AF-21	De Almeida et al. (2003)	-62.1417	-62.2292	-58.85	-59.0083	Fildes Peninsula	South Shetland Islands	52.14	0.85	17.96	10.05		0.18	3.73	7.79	3.58	0.67	0.15				99.13	2.03				174				16.38					3.09	1.64	1.096		2.64		2	0.59	7.69		0.268		2	11.67
AF-2A	De Almeida et al. (2003)	-62.1417	-62.2292	-58.85	-59.0083	Fildes Peninsula	South Shetland Islands	51.44	0.93	16.75	8.79		0.14	4.98	8.41	2.95	0.94	0.14				99.55	4.08				201				21.08					2.91	1.34	0.883		2.57		2	0.48	9.66		0.251		4	12.07
AF-2B	De Almeida et al. (2003)	-62.1417	-62.2292	-58.85	-59.0083	Fildes Peninsula	South Shetland Islands	53.22	0.88	17.18	8.22		0.14	4.68	8.35	3.18	1.03	0.14				99.64	2.62				204				21.98					2.8	1.5	0.883		2.94		3	0.55	10.24		0.272		4	13.98
AF-5	De Almeida et al. (2003)	-62.1417	-62.2292	-58.85	-59.0083	Fildes Peninsula	South Shetland Islands	50.34	0.45	20.56	7.59		0.12	6.15	10.9	2.16	0.79	0.09				100.93	1.78				155				13.88					1.86	0.93	0.632		1.57		1	0.3	6.24		0.155		1	8.76
HA1.1	De Almeida et al. (2003)	-62.5417	-62.5667	-59.5417	-59.625	Fort Point	South Shetland Islands	47.47	0.83	25.74	8.67		0.12	3.06	9.33	3.23	0.45	0.04				100.95	2.01				184				12.17					2.46	1.26	0.94		2.05		1	0.44	5.22		0.2		1.24	8.72
98-10	Demant et al. (2004)	-62.67	-62.67	-61	-61	Byers Peninsula, Cerro Negro	South Shetland Islands	48.32	0.39	13.92	3.49	4.68	0.15	11.22	12.18	1.52	0.14	0.08				98.8	2.71				66.19				10.38	47.1	572	0.033		1.53	0.94	0.53		1.55		0.86	0.33	4.2		0.14		0.48	6.48
98-11	Demant et al. (2004)	-62.68	-62.68	-61.11	-61.11	Byers Peninsula, Sealer Hill	South Shetland Islands	45.77	1.14	20.37	4.43	5.65	0.15	4.58	12	2.56	0.2	0.18				99.23	2.2				75.34				11.16	38.4	36	0.733		2.57	1.45	0.97		2.67		1.11	0.53	4.13		0.19		0.96	9.01
98-12	Demant et al. (2004)	-62.68	-62.68	-61.11	-61.11	Byers Peninsula, Sealer Hill	South Shetland Islands	45.97	1.12	20.51	3.79	6.24	0.15	4.88	12.16	2.29	0.18	0.18				99.13	1.66				76.23				10.7	36.8	21	0.292		2.47	1.39	0.94		2.63		1.05	0.51	3.92		0.19		0.9	8.63
98-17	Demant et al. (2004)	-62.68	-62.68	-61.11	-61.11	Byers Peninsula, Sealer Hill	South Shetland Islands	53.53	1.58	15.83	4.66	5.71	0.19	3.15	7.44	3.34	0.97	0.39				99.03	2.24				240.07				39.44	23.2	21	0.215		5.86	3.44	1.74		6.2		4.27	1.23	15.98		0.51		4.67	24.43
98-20	Demant et al. (2004)	-62.65	-62.65	-61.06	-61.06	Byers Peninsula, Chester Cone near Basalt Lake	South Shetland Islands	50.4	1.29	17.34	4.62	6.23	0.2	4.17	9.23	3.23	0.22	0.25				99.65	2.47				138.8				19.78	31.7	48	1.841		3.83	2.25	1.37		3.97		1.97	0.79	7.55		0.32		1.87	14.31
98-27A	Demant et al. (2004)	-62.63	-62.63	-61.58	-61.58	Byers Peninsula, dyke	South Shetland Islands	57.51	1.3	14.79	2.87	6.23	0.2	2.19	5.99	3.67	0.69	0.38				99.13	3.31				335.61				45.8	14.8	17	5.043		6.5	3.91	1.88		6.96		4.8	1.36	18.71		0.57		5.54	27.67
98-29	Demant et al. (2004)	-62.67	-62.67	-61.25	-61.25	Byers Peninsula, Devils Point	South Shetland Islands	54.54	0.89	18.5	2.8	5.01	0.14	2.62	7.81	3.79	0.86	0.16				99.42	2.3				184.58				22.59	20.7	20	0.74		4.17	2.61	1.13		4.08		2.91	0.9	9.13		0.4		2.57	14.06
98-30	Demant et al. (2004)	-62.67	-62.67	-61.25	-61.25	Byers Peninsula, Devils Point	South Shetland Islands	49.07	0.98	16.61	3.01	6.07	0.15	8.18	9.04	2.72	0.27	0.23				100.79	4.46				73.48				16.37	40	320	0.581		3.29	1.97	1.09		3.63		1.94	0.71	6.22		0.29		1.99	11.11
98-32	Demant et al. (2004)	-62.64	-62.64	-61.1	-61.1	Byers Peninsula, Usnea plug	South Shetland Islands	56.84	0.7	17.1	4.35	2.96	0.21	2.8	6.19	3.87	0.78	0.23				99.96	3.93				138.54				27.49	13.1	31	0.26		3.68	2.29	1.31		3.94		2.85	0.81	11.01		0.37		2.56	17.33
98-34	Demant et al. (2004)	-62.66	-62.66	-61.08	-61.08	Byers Peninsula, Falso Negro	South Shetland Islands	55.05	1.54	15.73	3.14	6.12	0.24	2.71	6.95	3.48	0.4	0.55				99.12	3.21				324.34				45.6	17.8	18	1.0025		7.22	4.16	2.24		7.76		4.66	1.52	17.92		0.6		4.92	30.19
98-5	Demant et al. (2004)	-62.67	-62.67	-61	-61	Byers Peninsula, Cerro Negro	South Shetland Islands	48.83	0.99	16.61	3.56	6.27	0.17	6.61	11.63	2.35	0.23	0.15				99.05	1.65				91.26				13.27	39.5	123	0.037		3.08	1.87	0.98		3		1.6	0.66	5.16		0.27		1.8	9.31
98-6	Demant et al. (2004)	-62.67	-62.67	-61	-61	Byers Peninsula, Cerro Negro	South Shetland Islands	49.15	1.08	16.74	3.81	6.47	0.17	5.93	10.71	2.52	0.07	0.24				99.28	2.39				88.59				18.56	37.3	90	0.056		3.4	2.03	1.14		3.43		1.81	0.72	7.38		0.29		2.7	12.14
98-9	Demant et al. (2004)	-62.67	-62.67	-61	-61	Byers Peninsula, Cerro Negro	South Shetland Islands	53.1	0.65	16.63	2.84	5.7	0.16	6.06	10.01	2.51	0.38	0.1				100.58	2.44				79.74				10.56	36.4	139	0.061		2.73	1.72	0.74		2.43		1.61	0.58	4.19		0.26		1.23	7.12
13DR-02	Fretzdorff et al. (2004)	-62.1117	-62.1117	-56.515	-56.515		Bransfield subalkaline with significant subduction influence	65.12	0.85	11.54	6.32		0.1	3.67	7.02	2.14	0.26	0.09				98.73	1.62				573				9.33	18.5	25.8	0.614	31.9	2.71	1.57	0.797		2.48		1.62	0.564	3.39		0.22		1.33	6.82
13DR-03	Fretzdorff et al. (2004)	-62.1117	-62.1117	-56.515	-56.515		Bransfield subalkaline with significant subduction influence	51.26	1.18	16.85	9.49		0.15	5.8	10.58	3.25	0.38	0.09				98.95	-0.08				55.3				10.4	32.6	23.5	0.474	52.6	3.83	2.25	1.03		3.29		2.16	0.796	3.76		0.319		1.22	8.34
14DR-01	Fretzdorff et al. (2004)	-62.07	-62.07	-56.3883	-56.3883		Bransfield subalkaline with significant subduction influence	47.88	1.21	17.29	9.44		0.14	7.78	12.36	2.85	0.44	0.11				99.48	-0.02				54.8				10.4	33.1	17.8	0.512	52	3.9	2.28	1.02		3.28		2.21	0.817	3.75		0.33		1.22	8.41
14DR-06	Fretzdorff et al. (2004)	-62.07	-62.07	-56.3883	-56.3883		Bransfield alkaline	47.22	1.94	15	12.22		0.17	9.1	8.74	3.74	1.21	0.44				99.18	-0.6				152				45.2	48.9	278	0.28	42.9	4.66	2.34	1.68		5.06		3.94	0.882	22.2		0.296		31.4	22.2
15DR-01gl	Fretzdorff et al. (2004)	-62.04	-62.04	-56.3267	-56.3267		Bransfield subalkaline with significant subduction influence	50.84	1.77	14.96	11.1		0.18	5.5	10.15	3.21	0.38	0.24				98.33					54.3				12	33.9	109	0.36	60.2	3.72	2.15	1.09		3.29		2	0.762	4.44		0.299		1.63	8.99
16DR-01	Fretzdorff et al. (2004)	-62.0017	-62.0017	-56.235	-56.235		Bransfield subalkaline with significant subduction influence	50.27	1.19	16.65	8.7		0.12	6.49	11.58	2.57	0.39	0.13				98.36	0.27				128				26.7	28.7	170	0.223	53.4	3.51	1.96	1.17		3.55		2.5	0.709	10.6		0.262		1.34	15.6
16DR-02	Fretzdorff et al. (2004)	-62.0017	-62.0017	-56.235	-56.235		Bransfield subalkaline with significant subduction influence	50.54	1.19	16.79	8.75		0.13	7.11	11.55	2.72	0.48	0.15				99.87	0.46				131				26.8	32.6	167	0.275	56.1	3.87	2.1	1.23		3.87		2.61	0.765	11.1		0.288		1.37	16.2
16DR-11	Fretzdorff et al. (2004)	-62.0017	-62.0017	-56.235	-56.235		Bransfield subalkaline with significant subduction influence	63.28	1.05	15.3	6.79		0.14	1.47	4.02	5.21	1.53	0.24				98.93	-0.1				243				29.6	9.44	1.38	3.02	45.1	6.85	4.13	1.45		6.08		5.6	1.44	12		0.636		2.63	19.7
17DR-01	Fretzdorff et al. (2004)	-61.9733	-61.9733	-56.18	-56.18		Bransfield subalkaline with significant subduction influence	50.09	1.31	16.61	9.11		0.14	6.66	11.22	2.83	0.51	0.15				99.09	0.46				112				23.5	34.6	162	0.279	62.2	4.33	2.44	1.29		4.17		2.64	0.879	9.49		0.34		1.46	15.2
17DR-02	Fretzdorff et al. (2004)	-61.9733	-61.9733	-56.18	-56.18		Bransfield subalkaline with minor subduction influence	53.46	1.41	15.31	9.76		0.19	5.17	8.77	3.94	0.56	0.2				99.23	0.46				49.8				19.7	26.1	134	0.306	38.6	7.8	4.58	1.96		6.51		4.2	1.65	6.51		0.67		2.92	16.8
17DR-06	Fretzdorff et al. (2004)	-61.9733	-61.9733	-56.18	-56.18		Bransfield subalkaline with significant subduction influence	53.92	1.62	16.14	10.51		0.16	3.66	7.79	4.42	0.34	0.15				98.93	0.22				90.3				19.8	27.3	30.3	0.175	20.5	6.28	3.71	1.62		5.35		3.83	1.31	7.21		0.548		2.16	15.2
18DR-01	Fretzdorff et al. (2004)	-61.88	-61.88	-55.9833	-55.9833		Bransfield subalkaline with significant subduction influence	51.14	0.6	15.44	7.86		0.13	10.71	9.46	2.78	0.41	0.08				98.63	0.02				80.2				8.6	41	386	0.436	59.9	2.51	1.51	0.666		2.17		1.69	0.528	3.55		0.226		0.933	6.15
18DR-09	Fretzdorff et al. (2004)	-61.88	-61.88	-55.9833	-55.9833		Bransfield subalkaline with significant subduction influence	51.37	0.6	15.62	7.7		0.13	10.49	9.55	2.84	0.41	0.08				99.11	0.32				83.6				9.07	37.6	334	0.386	53	2.61	1.54	0.679		2.3		1.74	0.542	3.68		0.235		0.942	6.45
20DR-01	Fretzdorff et al. (2004)	-61.81	-61.81	-55.4767	-55.4767		Bransfield alkaline	44.39	2.57	14.87	12.12		0.14	8.63	8.02	3.58	2.09	0.69				98.84	1.74				185				66.2	47.8	205	0.323	44.2	4.89	2.31	2.21		6.11		5.3	0.902	32.1		0.28		41.8	31.6
20DR-02	Fretzdorff et al. (2004)	-61.81	-61.81	-55.4767	-55.4767		Bransfield subalkaline with significant subduction influence	55.78	0.78	16.74	6.65		0.12	4.3	5.13	3.74	2.79	0.15				99.46	3.28				441				25.8	16.2	53.4	0.437	67.7	3.17	1.82	0.975		3.36		2.65	0.635	11.3		0.241		2.32	14.4
21DR-01	Fretzdorff et al. (2004)	-61.8317	-61.8317	-55.4733	-55.4733		Bransfield subalkaline with significant subduction influence	57.54	0.78	17.87	6.36		0.1	4.51	7.07	3.61	0.88	0.14				101.03	2.17				285				28.2	17.6	48.14	0.869	136	3.62	2.08	1.1		3.7		3.36	0.735	12		0.3		2.78	15.9
23DR-02	Fretzdorff et al. (2004)	-61.7617	-61.7617	-55.4167	-55.4167		Bransfield subalkaline with significant subduction influence	54.15	0.82	18.71	7.75		0.09	2.74	8.25	3.12	2.21	0.26				99.77	1.67				497				42.8	14.1	4.73	1.54	128	3.37	1.92	1.12		3.87		3.97	0.68	19		0.278		2.89	21.2
23DR-10	Fretzdorff et al. (2004)	-61.7617	-61.7617	-55.4167	-55.4167		Bransfield subalkaline with significant subduction influence	53.55	0.8	18.45	7.53		0.1	2.54	8.06	3.46	1.88	0.28				99.39	2.74				496				44.6	17.2	8.01	3.82	147	3.82	2.2	1.22		4.35		4.26	0.776	20.7		0.325		3.16	23
23DR-12	Fretzdorff et al. (2004)	-61.7617	-61.7617	-55.4167	-55.4167		Bransfield subalkaline with significant subduction influence	53.46	0.78	18.95	7.04		0.11	2.05	8.39	3.02	2.04	0.24				98.06	1.98				475				40.9	11.1	4.71	3.51	132	3.21	1.83	1.08		3.67		3.84	0.644	18.3		0.264		2.78	20.2
25DR-02	Fretzdorff et al. (2004)	-61.89	-61.89	-55.815	-55.815		Bransfield subalkaline with minor subduction influence	49.61	1.32	15.91	8.83		0.14	9.85	9.32	3.47	0.47	0.2				99.25	0.13				34.2				17.3	43.7	446	0.14	48.1	4.65	2.72	1.25		4.23		3.28	0.971	6.19		0.39		3.38	12.6
25DR-04	Fretzdorff et al. (2004)	-61.89	-61.89	-55.815	-55.815		Bransfield subalkaline with minor subduction influence	49.12	1.88	15.86	10.17		0.16	7.71	9.99	3.75	0.38	0.25				99.39	0.12				27.4				23.2	33.7	221	0.071	53.1	6.33	3.72	1.66		5.6		4.38	1.32	7.65		0.516		4.13	17
25DR-06	Fretzdorff et al. (2004)	-61.89	-61.89	-55.815	-55.815		Bransfield alkaline	47.79	2.01	15.11	11.6		0.16	8.79	8.53	3.45	1.21	0.45				98.87	-0.23				168				46.6	45.9	298	0.609	41.8	4.75	2.39	1.78		5.34		3.71	0.9	22.1		0.287		29.2	23.2
26DR-01	Fretzdorff et al. (2004)	-61.9267	-61.9267	-55.8883	-55.8883		Bransfield alkaline	45.89	2.15	15.36	11.82		0.16	8.92	8.02	4.14	1.52	0.66				99.89	1.25				161				58.4	46	228	0.258	46.6	4.86	2.36	1.95		5.7		4.87	0.916	28.7		0.302		36.6	27.9
26DR-03	Fretzdorff et al. (2004)	-61.9267	-61.9267	-55.8883	-55.8883		Bransfield alkaline	47.47	1.75	15.42	10.67		0.15	8.35	8.07	3.29	1.45	0.4				98.11	1.09				199				39.4	37.6	290	0.145	39.6	4.19	2.2	1.55		4.46		4	0.82	17.9		0.289		23.2	20
26DR-05	Fretzdorff et al. (2004)	-61.9267	-61.9267	-55.8883	-55.8883		Bransfield alkaline	46	2.03	15.09	12.38		0.17	8.54	9.42	3.08	0.99	0.43				99.01	0.88				105				39.1	51.3	364	0.263	52.9	4.58	2.26	1.67		5.13		3.41	0.861	18.5		0.279		24.4	20.6
27DR-01	Fretzdorff et al. (2004)	-61.96	-61.96	-55.87	-55.87		Bransfield subalkaline with minor subduction influence	50.35	1.49	17.28	8.45		0.14	6.37	10.9	3.69	0.39	0.18				99.01	-0.23				30.2				16	30.9	153	0.137	50.7	4.99	2.92	1.33		4.32		3.27	1.04	5.56		0.42		3.08	12.3
27DR-04	Fretzdorff et al. (2004)	-61.96	-61.96	-55.87	-55.87		Bransfield subalkaline with minor subduction influence	50.74	1.48	17.01	8.55		0.14	6.13	10.49	3.56	0.39	0.19				98.58	-0.1				45.9				17.3	30	143	0.343	53.6	4.9	2.91	1.31		4.3		3.25	1.03	6.14		0.406		3.32	12.6
28DR-01	Fretzdorff et al. (2004)	-61.9883	-61.9883	-55.8967	-55.8967		Bransfield subalkaline with minor subduction influence	50.02	1.2	16.16	8.46		0.15	9.67	10.19	3.15	0.4	0.17				99.76	0.19				43.9				14.6	38.4	274	0.244	57.3	4.1	2.34	1.12		3.66		2.62	0.843	5.48		0.335		2.92	10.4
28DR-10	Fretzdorff et al. (2004)	-61.9883	-61.9883	-55.8967	-55.8967		Bransfield subalkaline with significant subduction influence	48.2	1.17	16.99	10.2		0.16	7.08	8.88	3.43	0.33	0.33				100.01	3.24				174				25.9	36.1	245	0.039	61.9	4.09	2.29	1.36		4.17		2.37	0.829	11.1		0.337		5.15	16.4
2DR-01	Fretzdorff et al. (2004)	-62.12	-62.12	-57.01	-57.01		Bransfield subalkaline with significant subduction influence	51.19	0.71	17.74	7.57		0.12	6.65	12.13	2.47	0.44	0.08				99.33	0.23				90.1				10.3	27.1	59.9	0.463	61.7	2.58	1.54	0.674		2.25		1.67	0.541	4.17		0.222		1.48	6.57
38DR-01	Fretzdorff et al. (2004)	-62.1817	-62.1817	-57.24	-57.24		Bransfield subalkaline with significant subduction influence	67	0.73	14.49	5.1		0.15	0.91	2.88	5.52	1.17	0.18				99.11	0.98				233				53.2	0.858		1.05	2.17	10.8	6.76	2.14		9.36		9.22	2.29	20.1		1.02		4.98	33.2
3DR-01	Fretzdorff et al. (2004)	-62.1167	-62.1167	-56.8883	-56.8883		Bransfield subalkaline with significant subduction influence	50.29	0.61	15.1	7.73		0.13	11.7	10.34	2.23	0.27	0.05				98.44	-0.01				54.4				7.17	39.1	378	0.341	52.4	2.41	1.45	0.632		2.1		1.55	0.508	2.62		0.208		0.687	5.45
3DR-02	Fretzdorff et al. (2004)	-62.1167	-62.1167	-56.8883	-56.8883		Bransfield subalkaline with significant subduction influence	51.55	0.86	18.1	7.88		0.13	6.72	11.56	2.94	0.31	0.09				99.73	-0.41				54.2				8.42	30.7	156	0.51	72.8	3.29	1.96	0.853		2.82		1.84	0.701	3.13		0.29		0.811	6.87
3DR-05	Fretzdorff et al. (2004)	-62.1167	-62.1167	-56.8883	-56.8883		Bransfield subalkaline with significant subduction influence	58.04	0.72	16.12	6.19		0.11	4.1	6.55	5.06	1.21	0.13				97.82	-0.41				57.7				8.78	31	158	0.455	75.3	3.42	2.01	0.903		2.92		1.85	0.718	3.23		0.287		0.839	7.23
3DR-07	Fretzdorff et al. (2004)	-62.1167	-62.1167	-56.8883	-56.8883		Bransfield subalkaline with significant subduction influence	65.7	0.77	15.83	4.44		0.07	0.98	3.34	5.28	1.97	0.15				98.87	0.34				287				31.2	8.03	1.29	2.62	20.6	5.41	3.15	1.18		4.91		3.13	1.12	13.2		0.447		3.06	18.3
3DR-08	Fretzdorff et al. (2004)	-62.1167	-62.1167	-56.8883	-56.8883		Bransfield subalkaline with significant subduction influence	67.63	0.6	14.71	3.85		0.07	0.71	2.55	5.22	2.43	0.11				98.37	0.49				331				33.7	5.57	0.11	4.67	34.2	6.08	3.65	1.07		5.55		5.1	1.26	14		0.529		3.55	19.9
3DR-09gl	Fretzdorff et al. (2004)	-62.1167	-62.1167	-56.8883	-56.8883		Bransfield subalkaline with significant subduction influence	72.39	0.7	12.41	4.6		0.09	0.57	1.65	3.9	2.94	0.17				99.42					321				43.1	7.47	0.83	2.57	28.5	8.49	5.16	0.932		7.57		9.35	1.78	17.5		0.797		4.22	26.2
3DR-11	Fretzdorff et al. (2004)	-62.1167	-62.1167	-56.8883	-56.8883		Bransfield subalkaline with significant subduction influence	56.71	0.86	16.94	7.79		0.14	4.14	8.34	3.73	0.96	0.13				99.63	-0.11				166				17.8	24.1	85.9	1.37	75.4	3.81	2.23	0.952		3.47		2.88	0.806	7.44		0.338		1.48	11.3
3DR-14	Fretzdorff et al. (2004)	-62.1167	-62.1167	-56.8883	-56.8883		Bransfield subalkaline with significant subduction influence	58.41	0.58	17.95	4.89		0.06	4.01	7.27	3.84	0.87	0.13				99.29	1.28				135				19.1	17.8	56.1	0.41	51.7	1.99	1.1	0.781		2.27		2.3	0.404	8.32		0.151		1.28	10.9
4DR-01	Fretzdorff et al. (2004)	-62.06	-62.06	-56.9633	-56.9633		Bransfield subalkaline with significant subduction influence	53.42	0.8	18.88	7.84		0.12	4.76	10.13	3.22	0.47	0.08				99.64	-0.08				66.4				8.43	27.1	42.6	0.577	76.6	3.16	1.83	0.856		2.72		1.83	0.649	3.11		0.259		0.868	6.82
4DR-07	Fretzdorff et al. (2004)	-62.06	-62.06	-56.9633	-56.9633		Bransfield subalkaline with significant subduction influence	53.26	0.76	18.41	7.86		0.13	5.54	10.27	3.06	0.43	0.07				100.05	0.26				61.6				7.87	28.1	52.4	0.542	93.3	2.92	1.71	0.803		2.57		1.66	0.611	2.87		0.242		0.843	6.35
4DR-09	Fretzdorff et al. (2004)	-62.06	-62.06	-56.9633	-56.9633		Bransfield subalkaline with significant subduction influence	57.71	1.31	16.02	9.81		0.16	2.37	6.15	4.33	0.89	0.16				99.29	0.38				127				17.1	22	0.4	1.1	59.1	5.56	3.22	1.36		4.96		3.53	1.13	6.43		0.463		1.85	13.4
4DR-13	Fretzdorff et al. (2004)	-62.06	-62.06	-56.9633	-56.9633		Bransfield alkaline	46.26	2.3	16.22	10.32		0.14	7.28	7.97	4.61	2	0.93				100.36	2.33				304				81.8	35.8	171	0.314	37.3	4.76	2.24	2.19		6.04		5.04	0.875	44.1		0.269		57.7	34.6
7GTV-01	Fretzdorff et al. (2004)	-62.1917	-62.1917	-57.2767	-57.2767		Bransfield subalkaline with significant subduction influence	68.38	0.49	13.96	5.82		0.16	0.48	2.55	6.11	1.02	0.12				99.81	0.72				154				41.9	1.44	0.91	0.981	8.67	11.4	7	2.04		9.72		9.24	2.39	15.6		1.07		4.84	29.3
325C3	Haase et al. (2012)	-62.45	-62.45	-60.7833	-60.7833	Cape Shirreff	South Shetland Islands	48.08	1.29	18.18	10.88		0.22	4.92	11.21	2.91	0.33	0.31				100.8	2.47				96.0249				23.7015	37.6416	119.504	0.0279776	59.7744	4.05375	2.24856	1.41029		4.25909		2.24079	0.80923	9.5341	4.21011	0.318753		2.95768	15.9073
JB.642.3	Haase et al. (2012)	-62.6333	-62.6333	-61.25	-61.25	Rugged Island	South Shetland Islands	51.85	0.79	18.99	8.31		0.15	3.63	7.42	4.13	1.29	0.21				100.75	3.98				259.353				23.4898	19.3775	20.1414	0.51761	25.6456	3.81445	2.29543	1.14372		3.71171		1.92952	0.814065	9.84226	3.79251	0.369382		2.39272	14.0734
P.1104.1	Haase et al. (2012)	-62.1667	-62.1667	-58.95	-58.95	n. Fildes Peninsula	South Shetland Islands	53.87	0.84	18.57	8.21		0.19	2.94	8.77	3.83	0.51	0.23				99.71	1.75				273.955				27.8329	19.9386	7.163	1.73097	124.741	3.30417	1.79423	1.15834		3.90091		2.50342	0.647115	12.2485	6.13753	0.259045		2.87474	17.1809
P.1128.1	Haase et al. (2012)	-62.1667	-62.1667	-58.95	-58.95	n. Fildes Peninsula	South Shetland Islands	47.78	0.42	20.03	7.76		0.14	6.88	11.86	2.04	0.31	0.09				100.29	2.98				102.143				11.4831	46.8296	101.813	0.0612536	80.4578	1.54511	0.845938	0.637219		1.81225		1.17821	0.312221	5.16933	3.93786	0.125279		0.729018	7.71579
P.1131.1	Haase et al. (2012)	-62.1667	-62.1667	-58.95	-58.95	n. Fildes Peninsula	South Shetland Islands	49.59	0.94	18.71	11.53		0.19	4.24	9.99	3.27	0.25	0.12				100.25	1.42				126.072				13.3059	30.7446	3.51809	0.120624	258.781	2.58514	1.4544	0.981441		2.7717		1.2641	0.518671	5.64086	4.31062	0.207756		0.730743	9.52884
P.1146.1A	Haase et al. (2012)	-62.1667	-62.1667	-58.95	-58.95	n. Fildes Peninsula	South Shetland Islands	50.05	0.88	19.28	9.5		0.19	4.58	10.18	3.03	0.31	0.11				100.45	2.34				113.335				9.47808	31.7581	30.9942	0.00987409	153.73	2.31776	1.33735	0.862416		2.2898		0.988354	0.487272	4.05457	4.26162	0.202226		0.773954	7.45984
P.1155.1	Haase et al. (2012)	-62.1667	-62.1667	-58.95	-58.95	n. Fildes Peninsula	South Shetland Islands	61.39	0.82	17.01	5.87		0.16	1.58	5.16	4.57	1.62	0.29				100.17	1.7				401.218				37.3825	12.0163	5.33372	0.578565	61.8231	3.94705	2.17804	1.38548		4.61319		3.50377	0.797784	16.1176	9.8946	0.337016		5.43786	21.9591
P.1166.1	Haase et al. (2012)	-62.1667	-62.1667	-58.95	-58.95	n. Fildes Peninsula	South Shetland Islands	52.09	0.97	17.02	10.19		0.17	4.79	9.33	3.56	0.8	0.15				99.7	0.63				195,805 \ 5,49386				19,022 \ 1,89248	28,9178 \ 57,0183	26,4345 \ 384,893	0,169892 \ 0,0037559	90,2689 \ 127,505	3,10377 \ 2,42259	1,74117 \ 1,50519	1,03766 \ 0,530281		3,34537 \ 1,7248		1,94538 \ 0,547504	0,619907 \ 0,524973	7,83727 \ 0,598773	8.37729	0,251822 \ 0,222698		1,36437 \ 0,524089	12,4811 \ 2,33181
P.1177.1	Haase et al. (2012)	-62.1667	-62.1667	-58.95	-58.95	n. Fildes Peninsula	South Shetland Islands	49.33	0.78	18.47	9.78		0.18	4.48	9.51	3.02	0.76	0.12				100.23	3.8				154.493				14.083	33.9659	7.16628	0.136146	116.598	2.49202	1.40881	0.99303		2.67526		1.52481	0.515095	6.13574	6.66357	0.213709		0.807613	10.1696
P.1180.1	Haase et al. (2012)	-62.1667	-62.1667	-58.95	-58.95	n. Fildes Peninsula	South Shetland Islands	54.88	0.82	17.39	8.59		0.14	3.77	8.26	3.5	1.5	0.27				100.35	1.23				332.529				35.288	28.1565	20.5426	0.437034	149.292	4.14718	2.34986	1.30306		4.80018		3.61932	0.851752	15.528	9.15712	0.359716		4.35577	21.9381
P.1196.1	Haase et al. (2012)	-62.2333	-62.2333	-59	-59	Stansbury Peninsula	South Shetland Islands	47.16	0.48	20.19	7.81		0.1	6.44	13.22	2.03	0.57	0.1				100.75	2.65				175.933				18.0858	45.5565	98.4108	0.0217387	151.622	1.59137	0.819608	0.780847		2.06604		1.06285	0.310502	8.33736	3.28409	0.114137		0.638713	11.0198
P.1205.1	Haase et al. (2012)	-62.2333	-62.2333	-59	-59	Stansbury Peninsula	South Shetland Islands	48.06	0.51	20.14	8.49		0.12	5.29	12.92	2.04	0.52	0.09				100.55	2.37				114.216				14.6667	34.7234	31.401	0.0331698	70.2523	1.54781	0.822868	0.678164		1.90521		1.11192	0.298424	6.19707	2.85636	0.112657		0.551128	8.63683
P.1208.1	Haase et al. (2012)	-62.2333	-62.2333	-59	-59	Stansbury Peninsula	South Shetland Islands	53.47	0.98	17.54	9.96		0.2	3.63	8.25	3.85	0.28	0.16				100.18	1.86				176.234				17.7169	22.9002	1.62801	0.48402	175.88	3.18199	1.81038	1.13256		3.37901		1.67182	0.641157	7.23836	2.81238	0.263549		1.23401	11.947
P.1224.1	Haase et al. (2012)	-62.2333	-62.2333	-59	-59	Stansbury Peninsula	South Shetland Islands	50.84	0.5	18.92	7.8		0.15	5.91	11.14	2.44	0.75	0.08				100.09	1.56				163.138				14.2798	30.1047	55.1388	0.0963672	99.559	1.76622	0.971879	0.674539		2.1066		1.32324	0.347777	6.05243	3.11363	0.139048		0.739672	8.78866
P.1484.1	Haase et al. (2012)	-62.3667	-62.3667	-59.7167	-59.7167	Coppermine Peninsula	South Shetland Islands	50.81	0.71	16.33	8.39		0.17	7.32	11.43	2.2	0.88	0.17				100.06	1.65				364.497				35.0052	31.8339	222.616	0.0822456	68.035	2.41415	1.24166	1.01148		3.42267		1.64088	0.45394	16.0917	5.43962	0.163529		1.2516	19.4794
P.1492.2	Haase et al. (2012)	-62.3667	-62.3667	-59.7167	-59.7167	Coppermine Peninsula	South Shetland Islands	50.02	0.7	16.84	8.83		0.14	7.66	11.74	1.99	0.18	0.11				100.11	1.9				92.6743				12.734	33.502	257.859	0.327498	73.1974	1.95699	1.0965	0.726291		2.09597		1.07083	0.392947	5.37769	3.94154	0.155133		0.763843	8.34962
P.1607.1	Haase et al. (2012)	-62.3667	-62.3667	-59.7167	-59.7167	Coppermine Peninsula	South Shetland Islands	49.87	0.86	16.35	9.19		0.15	8.23	9.42	2.74	0.44	0.33				100.68	3.1				198.384				27.0804	33.1994	215.446	0.0310496	19.4312	2.85869	1.50031	1.11143		3.47635		1.81681	0.551047	11.0881	5.30556	0.200925		3.12187	15.9306
P.1817.1	Haase et al. (2012)	-62.5167	-62.5167	-60.0667	-60.0667		South Shetland Islands	50.07	0.64	17.26	8.49		0.15	9.23	10.18	2.41	0.25	0.06				99.97	1.23				77.4439				5.54907	37.2231	393.786	0.43484	40.2009	2.62851	1.60737	0.673201		2.25237		1.03848	0.553143	1.93463	7.33766	0.247954		0.637428	5.14137
P.1818.10	Haase et al. (2012)	-62.5167	-62.5167	-60.0667	-60.0667		South Shetland Islands	47.79	1.3	16.84	9.95		0.15	8.16	11.44	3.36	0.57	0.3				99.5	-0.36				181.076				29.3886	36.6223	264.086	0.17171	96.5778	2.94278	1.5377	1.06977		3.43881		2.00623	0.568559	12.518	6.52273	0.202329		3.82699	15.753
P.1818.12	Haase et al. (2012)	-62.5167	-62.5167	-60.0667	-60.0667		South Shetland Islands	47.33	1.43	15.79	10.85		0.16	10.14	10.61	3.34	0.6	0.39				100.31	-0.33				202.388				37.0322	42.4059	447.136	0.143467	107.705	3.14595	1.6485	1.15266		3.77163		2.20255	0.60528	16.1803	6.88383	0.218202		4.67845	19.0715
P.1820.5	Haase et al. (2012)	-62.5167	-62.5167	-60.0667	-60.0667		South Shetland Islands	47.98	1.1	16.35	9.88		0.15	10.15	10.94	2.92	0.38	0.26				100.21	0.1				109.062				18.3486	40.8893	469.11	0.15104	88.6021	2.63057	1.46916	0.851564		2.66844		1.28463	0.52645	7.18419	6.24457	0.202197		2.3925	10.4804
P.1825.5	Haase et al. (2012)	-62.45	-62.45	-59.8	-59.8	north of Spark Point	South Shetland Islands	51.79	1.62	14.94	13.48		0.22	4.28	8.61	3.37	0.33	0.26				100.17	1.27				164.483				18.6694	30.6909	30.4489	0.0290645	109.502	4.67474	2.66797	1.3368		4.48394		2.17362	0.946575	7.19342	5.79817	0.377408		1.94774	13.4074
P.1825.7	Haase et al. (2012)	-62.45	-62.45	-59.8	-59.8	north of Spark Point	South Shetland Islands	50.08	0.97	17.56	9.19		0.19	6.79	9.81	2.8	0.3	0.22				100.91	3				183.101				24.0789	40.8177	176.357	0.0196808	82.584	3.81432	2.15262	1.18122		4.00944		2.42465	0.789601	9.59671	5.84331	0.319495		2.61452	15.7937
P.232.1	Haase et al. (2012)	-62.25	-62.25	-58.6667	-58.6667	Potter Peninsula	South Shetland Islands	50.47	0.76	20.42	8.7		0.16	3.88	10.03	2.92	0.58	0.12				99.94	1.9				220.704				17.5454	25.954	7.84496	0.118929	246.596	2.53227	1.40124	0.906545		2.83264		1.60871	0.500626	7.26218	5.97691	0.204725		1.48853	10.8698
P.232.6	Haase et al. (2012)	-62.25	-62.25	-58.6667	-58.6667	Potter Peninsula	South Shetland Islands	49.65	0.91	19.92	8.73		0.26	3.91	10.45	3.35	0.29	0.24				100.12	2.41				216.415				26.6983	22.2573	29.621	0.454587	123.246	3.03058	1.59861	1.34818		3.74984		1.5692	0.600483	11.3997	12.3982	0.227877		2.01097	17.082
P.2760.10	Haase et al. (2012)	-62.1333	-62.1333	-58.1167	-58.1167	Lions Rump	South Shetland Islands	48.11	0.76	15.36	8.9		0.15	12.77	9.09	2.69	0.51	0.12				100.1	1.64				124.277				14.8812	51.3711	838.381	2.14854	48.7088	2.64734	1.50815	0.890868		2.72264		1.66085	0.547094	6.56019	10.57	0.226134		1.27007	9.98482
P.2770.4	Haase et al. (2012)	-62.1333	-62.1333	-58.1167	-58.1167	Lions Rump	South Shetland Islands	51.05	0.68	16.61	8.28		0.15	9.37	9.46	2.85	0.39	0.11				100.48	1.53				160.716				13.7509	48.481	658.026	4.30453	83.9663	2.38411	1.39048	0.78677		2.35959		1.44838	0.501789	6.50702	10.7909	0.218395		1.2512	8.55337
P.2774.11	Haase et al. (2012)	-62.1667	-62.1667	-58.1833	-58.1833	Cinder Spur	South Shetland Islands	51.06	0.83	18.24	8.52		0.15	6.11	10.04	3.51	0.68	0.15				100.26	0.97				174.527				17.418	32.4666	177.196	0.766599	106.169	3.15853	1.82315	1.05094		3.24382		1.90085	0.660214	7.67294	11.6746	0.279522		1.79047	11.9214
P.2775.1A	Haase et al. (2012)	-62.1667	-62.1667	-58.1833	-58.1833	Cinder Spur	South Shetland Islands	53.95	0.64	19.62	7.23		0.17	2.83	8.92	4.19	0.88	0.21				100.04	1.4				259.979				25.1402	19.4159	31.4044	0.385225	134.884	3.32091	1.98846	1.13259		3.45035		2.52427	0.704981	10.9305	3.76875	0.329054		2.36115	14.5133
P.2783.5	Haase et al. (2012)	-62.1667	-62.1667	-58.1833	-58.1833	Cinder Spur	South Shetland Islands	50.55	0.93	19.3	8.96		0.17	4.44	10.38	3.87	0.77	0.17				100.44	0.9				201.274				23.0449	28.7906	42.2542	0.120411	112.09	3.84876	2.23106	1.22787		3.94956		2.45717	0.804918	9.68376	7.42186	0.340875		1.80756	14.697
P.2797.5	Haase et al. (2012)	-62.1833	-62.1833	-58.2167	-58.2167	Martins Head	South Shetland Islands	51.2	0.88	20.93	8.35		0.17	3.35	9.53	3.87	0.97	0.16				100.14	0.73				243.273				27.3244	22.2961	15.7232	0.337087	136.52	3.29684	1.88585	1.09727		3.65493		2.23528	0.66326	12.1442	6.76479	0.275774		1.68617	15.1978
P.2797.6B	Haase et al. (2012)	-62.1833	-62.1833	-58.2167	-58.2167	Martins Head	South Shetland Islands	55.03	0.59	20.07	6.64		0.12	2.7	8.31	4.21	0.98	0.2				100.85	2				258.605				27.1979	16.3444	32.7976	0.128527	70.6491	2.94441	1.73534	1.08998		3.19254		2.6084	0.614742	12.2302	9.16756	0.289823		2.06051	14.7571
P.2801.3A	Haase et al. (2012)	-62.1667	-62.1667	-58.2167	-58.2167	Legru Bay	South Shetland Islands	53.99	0.64	19.15	7.94		0.16	3.69	8.73	4.1	0.86	0.23				100.16	0.67				245.642				29.6915	20.0443	26.5528	0.327447	56.4602	3.1797	1.85206	1.06919		3.5813		2.60254	0.642764	13.2237	3.9517	0.292431		2.7469	15.9687
P.2809.3	Haase et al. (2012)	-62.1167	-62.1167	-58.4	-58.4	Point Hennequin	South Shetland Islands	54.38	0.76	17.6	7.79		0.15	4.44	8.57	3.64	0.63	0.21				99.24	1.07				288.93				37.459	25.8027	38.1978	0.290401	105.877	3.4404	1.82938	1.30406		4.54892		2.99513	0.658329	15.9421	4.4607	0.260576		1.73078	21.485
P.2811.18	Haase et al. (2012)	-62.1167	-62.1167	-58.4	-58.4	Point Hennequin	South Shetland Islands	54.13	0.77	18.42	7.97		0.2	4.48	8.42	3.56	0.89	0.23				100.32	1.25				289.453				36.3788	28.6571	33.0582	0.0626118	120.525	3.50456	1.84104	1.47088		4.55668		3.29733	0.686413	15.2418	7.58379	0.273363		1.96694	22.4914
P.2811.21	Haase et al. (2012)	-62.1167	-62.1167	-58.4	-58.4	Point Hennequin	South Shetland Islands	54.52	0.77	18.18	8.01		0.15	4.39	8.55	3.64	1.21	0.21				100.51	0.88				259.645				31.6545	27.5952	46.7225	0.299704	142.379	3.04737	1.60829	1.30981		3.91956		2.58597	0.601085	13.2004	6.24155	0.242028		1.72774	19.3161
P.376.1	Haase et al. (2012)	-62.65	-62.65	-61	-61	Byers, Negro Hill	South Shetland Islands	49.57	1	16.45	10.57		0.19	6.58	11.87	2.35	0.2	0.14				99.79	0.87				77.7726				13.7569	35.3605	120.998	0.269708	72.6836	3.21475	1.84309	0.989433		3.06321		1.48758	0.657383	5.16422	2.51254	0.260929		1.604	9.49241
P.443.7	Haase et al. (2012)	-62.1667	-62.1667	-58.5	-58.5	Point Thomas	South Shetland Islands	50.51	0.71	19.76	8.64		0.16	4.27	7.4	4.49	1	0.17				100.24	3.13				230.125				19.5761	29.1064	12.688	0.565081	129.282	2.68351	1.4832	1.16247		3.18283		1.68783	0.542493	8.89612	10.261	0.227036		1.13702	13.487
P.444.5	Haase et al. (2012)	-62.1667	-62.1667	-58.5	-58.5	Point Thomas	South Shetland Islands	46.19	0.73	19.18	9.13		0.27	3.6	10.06	4.69	0.18	0.14				100.44	6.27				99.7354				14.5865	36.6668	47.5215	0.357111	127.294	2.35879	1.27368	1.03558		2.79451		1.19218	0.475825	6.1681	11.6061	0.184017		0.981396	10.845
P.446.9A	Haase et al. (2012)	-62.6667	-62.6667	-61.1167	-61.1167	Byers, Sealer Hill	South Shetland Islands	46.35	1.28	19.08	11.85		0.16	5.28	11.67	2.51	0.32	0.17				99.73	1.06				81.7432				12.0642	35.9996	19.5436	0.407307	50.8798	2.83802	1.52508	1.03833		2.97435		1.08049	0.557823	4.35483	5.21702	0.199897		0.930506	9.65681
P.453.5	Haase et al. (2012)	-62.5833	-62.5833	-61.2167	-61.2167	Byers, Start Point	South Shetland Islands	48.3	0.73	16.06	10.26		0.19	7.38	12.12	2.27	0.25	0.11				100.51	2.84				178.594				15.1542	45.997	351.033	0.286265	52.6033	2.8877	1.75069	0.718141		2.6612		1.09278	0.609029	6.5018	5.75379	0.263722		1.29517	8.51818
P.466.1	Haase et al. (2012)	-62.65	-62.65	-60.6333	-60.6333	Hannah Point	South Shetland Islands	53.71	1.19	15.79	11.16		0.22	4.41	8.68	3.06	0.7	0.14				100.33	1.27				146.423				18.8796	28.6441	28.7279	0.214415	37.5262	3.8392	2.22884	1.12806		3.68496		2.1243	0.785365	7.67149	15.2284	0.325154		2.41138	12.148
P.476.1	Haase et al. (2012)	-63.65	-63.65	-61.63	-61.63	Hannah Point	South Shetland Islands	54.96	1.34	14.94	9.83		0.21	3.3	8.46	3.03	1.17	0.29				99.59	2.06				227.518				32.14	28.007	27.8762	0.22683	62.7336	6.30064	3.70483	1.54314		6.08997		3.93269	1.33396	13.1933	9.29349	0.55847		4.42984	21.2373
P.480.2	Haase et al. (2012)	-62.3833	-62.3833	-59.35	-59.35	Kitchen Point	South Shetland Islands	52.94	1.08	18.32	8.87		0.15	3.6	7.75	4.33	0.76	0.2				100.51	2.51				260.327				20.2436	22.9736	8.51174	0.0675684	114.516	3.81897	2.15	1.11291		3.90576		2.40977	0.766508	8.11916	5.71055	0.308268		2.01713	13.8467
P.608.5B	Haase et al. (2012)	-62.2	-62.2	-58.9833	-58.9833	s. Fildes Peninsula	South Shetland Islands	52.98	0.97	17.27	10.39		0.27	4.19	8.43	3.82	0.42	0.15				100.07	1.18				185.571				18.5334	25.6181	1.9519	0.368268	187.961	3.14462	1.76652	1.14768		3.38259		1.71681	0.62733	7.62077	5.09281	0.255083		1.16526	12.4158
P.696.1	Haase et al. (2012)	-62.25	-62.25	-58.6667	-58.6667	Potter Peninsula	South Shetland Islands	54.23	0.61	17.42	7.12		0.12	3.8	8.56	2.85	0.34	0.2				100.2	4.95				190.204				35.4507	22.1007	19.1316	1.15847	124.69	2.65071	1.36327	1.16572		3.734		2.7562	0.497767	15.625	30.2632	0.194068		1.84113	19.251
P.696.2	Haase et al. (2012)	-62.25	-62.25	-58.6667	-58.6667	Potter Peninsula	South Shetland Islands	55.43	0.57	18.26	7.24		0.13	3.98	7.97	3.09	1.09	0.2				100.65	2.69				276,258 \ 138,123				30,7477 \ 40,32	21,2739 \ 42,5426	15,6193 \ 275,369	0,393644 \ 0,0996312	110,329 \ 138,64	2,35615 \ 5,35342	1,2171 \ 2,41693	1,06158 \ 2,22414		3,29701 \ 6,25627		2,31993 \ 4,32792	0,442367 \ 0,968612	13,8815 \ 15,703	14.1131	0,172254 \ 0,272271		1,44569 \ 16,6738	17,1488 \ 25,3466
P.760.1	Haase et al. (2012)	-62.25	-62.25	-58.6667	-58.6667	Potter Peninsula	South Shetland Islands	49.51	0.93	19	9.71		0.16	5.26	10.72	2.83	0.29	0.21				100.46	1.84				187.49				22.71	34.7783	58.1164	0.243626	170.055	3.20882	1.73152	1.30171		3.77233		1.77078	0.645655	9.57089	9.58386	0.249369		1.9071	15.7607
P.810.3	Haase et al. (2012)	-62.1	-62.1	-57.9333	-57.9333		South Shetland Islands	48.34	1.19	15.56	9.74		0.16	10.99	9.9	3.1	0.57	0.26				99.81	0				165.049				24.435	46.2416	492.729	0.139883	75.3254	2.78036	1.42035	1.01493		3.24825		1.8794	0.529478	9.84806	5.35229	0.184229		3.21877	13.6085
P.810.4	Haase et al. (2012)	-62.1	-62.1	-57.9333	-57.9333		South Shetland Islands	48.47	1.21	16.67	10.24		0.16	9.31	9.77	3.4	0.62	0.29				99.79	-0.35				180.588				26.8088	36.914	201.896	0.152844	142.639	2.81187	1.42839	1.07723		3.35414		1.92963	0.534954	11.0632	6.60416	0.183732		3.40743	14.9885
P.840.3	Haase et al. (2012)	-62.3667	-62.3667	-59.7167	-59.7167	Coppermine Peninsula	South Shetland Islands	48.15	0.63	17.13	8.67		0.14	8.52	11.19	1.97	0.28	0.11				100.28	3.49				150.347				15.6436	38.039	310.346	0.0247728	59.7656	1.87715	1.04583	0.714275		2.13356		1.16331	0.372049	6.49609	3.52375	0.146254		0.922689	9.39795
P.841.12	Haase et al. (2012)	-62.3667	-62.3667	-59.7167	-59.7167	Coppermine Peninsula	South Shetland Islands	50.4	0.63	17.38	8.39		0.14	7.99	10.91	2.26	0.6	0.12				100.04	1.22				155.723				14.0221	42.6184	347.343	0.120453	43.5295	1.85905	1.04091	0.753439		2.06752		1.11966	0.382066	6.23989	4.676	0.152826		0.995311	9.27175
P.841.6	Haase et al. (2012)	-62.3667	-62.3667	-59.7167	-59.7167	Coppermine Peninsula	South Shetland Islands	48.46	1.18	17.325	8.495		0.13	4.655	9.135	4.465	1.445	0.27				101.02	5.46				353.569				29.0627	22.8139	87.5714	2.22294	88.7808	3.22737	1.65467	1.24093		4.12325		2.17511	0.613182	12.9172	2.49146	0.22057		2.19476	18.1656
P.841.7	Haase et al. (2012)	-62.3667	-62.3667	-59.7167	-59.7167	Coppermine Peninsula	South Shetland Islands	46.52	0.77	15.83	9.25		0.15	8.76	10.56	2.91	0.39	0.18				100.53	5.21				217.579				17.536	43.2222	427.088	1.48757	65.0386	2.30907	1.16714	1.01299		2.8928		0.993208	0.451008	7.95027	20.1368	0.154881		1.46541	12.3865
P.842.10	Haase et al. (2012)	-62.3667	-62.3667	-59.7167	-59.7167	Coppermine Peninsula	South Shetland Islands	50.95	1.02	17.87	10.31		0.19	7.57	8.48	1.45	0.24	0.1				99.62	1.44				162.17				35.0067	40.0873	293.48	1.12953	79.5431	3.61235	1.88061	1.42216		4.35674		2.36316	0.693409	14.49	5.50983	0.253205		4.18456	19.834
P.845.2A	Haase et al. (2012)	-62.6833	-62.6833	-61.1	-61.1	Byers, Vietor Rock lavas	South Shetland Islands	53.86	1.58	16.05	10.95		0.18	3.15	7.81	3.57	1.22	0.41				100.36	1.58				271.583				43.0773	23.3879	3.37177	0.186396	53.4138	6.39447	3.57306	1.81341		6.79074		4.10964	1.27448	17.58	6.20673	0.506149		4.51103	26.487
P.845.3A	Haase et al. (2012)	-62.6833	-62.6833	-61.1	-61.1	Byers, Vietor Rock lavas	South Shetland Islands	53.48	1.44	16.38	10.54		0.2	3.22	7.72	3.77	0.6	0.33				99.72	2.04				196.391				30.5621	19.9606	0.688839	0.227361	17.827	5.27888	2.95204	1.6405		5.48634		2.94466	1.05734	12.7985	8.83247	0.423328		3.14853	20.207
P.845.3B	Haase et al. (2012)	-62.6833	-62.6833	-61.1	-61.1	Byers, Vietor Rock lavas	South Shetland Islands	52.98	1.44	16.4	10.62		0.21	3.13	8	3.93	0.48	0.31				99.67	2.17				155.869				29.8749	19.3092	0.556843	0.120277	17.7055	5.226	2.95189	1.66703		5.36866		2.96926	1.05346	11.729	8.26299	0.415313		3.0111	20.0909
P.850.5	Haase et al. (2012)	-62.6333	-62.6333	-61.0667	-61.0667	Byers, Basalt Lake area	South Shetland Islands	50.53	1.34	17.44	11.68		0.2	4.28	9.59	3.13	0.26	0.25				100.48	1.78				139.958				19.6709	29.302	16.8087	1.35956	54.4044	3.80685	2.09624	1.31071		4.01307		1.74594	0.756618	7.2944	2.74181	0.289267		1.65407	13.935
P.850.8	Haase et al. (2012)	-62.6333	-62.6333	-61.0667	-61.0667	Byers, Basalt Lake area	South Shetland Islands	46.1	1.21	20.03	10.54		0.28	3.88	11.77	2.78	0.14	0.21				100.3	3.36				62.8996				16.1344	30.1353	36.9189	0.00655898	48.3789	3.74153	2.08733	1.25069		3.77299		1.59517	0.752314	5.77673	8.10744	0.286914		1.39563	12.3222
P.862.3	Haase et al. (2012)	-62.5833	-62.5833	-61.2167	-61.2167	Byers, Start Point	South Shetland Islands	49.78	0.94	19.98	8.5		0.19	4.17	6.66	3.78	1.97	0.17				100.42	4.28				269.191				21.2716	18.1832	12.0208	0.462252	49.2555	3.69868	2.26739	1.04937		3.41655		1.63754	0.800275	9.22845	7.50848	0.363731		2.30458	12.4047
P.862.4	Haase et al. (2012)	-62.5833	-62.5833	-61.2167	-61.2167	Byers, Start Point	South Shetland Islands	47.63	0.71	21.79	9.6		0.15	3.46	12.84	2.23	0.51	0.12				100.35	1.31				134.45				14.3254	29.3207	6.35111	0.091531	62.028	2.67881	1.58925	0.794211		2.57774		1.05825	0.553672	6.18333	2.78619	0.229613		1.1935	9.14303
R.3713.4	Hole (1990)	-65	-65.25	-59.5	-60	BruceNnunatak	Larsen Rift	49.11	2.33	14.12	11.7		0.15	8.32	9.18	3.67	1.25	0.49				100.12	-0.2				143				51.4	37.2	308					2.1				4.38		27.6		0.24		36	27.1
R.3728.2	Hole (1990)	-65	-65.25	-59.5	-60	Evensen Nunatak	Larsen Rift	51.5	1.74	14.82	11.41		0.14	8.32	8.61	3.34	0.76	0.24				100.48	-0.4				66				26.5	46.8	346					1.49				2.98		12.4		0.21		17	15.2
R.3729.1	Hole (1990)	-65.05	-65.05	-60.18	-60.18	Larsen Nunatak	Larsen Rift	49.61	1.94	14.81	12.29		0.15	7.87	8.5	3.5	0.89	0.27				99.23	-0.6				102				29	49.5	298					1.58				3.1		14.7		0.24		20	17.1
R.3731.3	Hole (1990)	-65	-65.25	-59.5	-60	Christensen Nunatak	Larsen Rift	52.31	1.84	14.87	11.28		0.14	7	8.58	3.31	0.78	0.22				100.13	-0.2				111				23.5	43.3	268					1.54				3.02		12		0.26		14	16.3
R.3731.4	Hole (1990)	-65	-65.25	-59.5	-60	Christensen Nunatak	Larsen Rift	52.34	1.93	15.11	11.17		0.14	6.21	8.66	3.37	0.9	0.25				99.98	-0.1				122				25.7	39.9	236					1.55				3.13		12.8		0.26		16	17.3
R.3735.1	Hole (1990)	-65	-65.25	-59.5	-60	Pollux Nunatak	Larsen Rift	45.56	2.65	13.65	12.81		0.16	10.27	9.54	3.6	1.57	0.54				99.85	-0.5				162				58	57.8	350					2.24				4.64		28.3		0.21		42	32
R.3739.2	Hole (1990)	-65	-65.25	-59.5	-60	Arktowski Nunatak	Larsen Rift	51.72	2.04	15.4	10.64		0.13	6.54	8.78	3.66	1.06	0.32				99.89	-0.4				125				36	38.2	192					1.74				3.69		17.5		0.22		24	21.5
R.3740.3	Hole (1990)	-65	-65.25	-59.5	-60	Bruce Nunatak	Larsen Rift	52.08	2.16	15.67	10.91		0.14	5.58	9.18	3.43	0.96	0.31				100.32	-0.1				116				31.4	35.5	166					1.82				3.41		14.9		0.25		20	19.2
R.3742.3	Hole (1990)	-65.05	-65.05	-60.18	-60.18	Akerlundh Nunatak	Larsen Rift	48.05	2.66	15.06	12.59		0.14	7.54	8.44	3.83	1.31	0.49				99.91	-0.2				116				41.8	52.4	146					2.05				4.08		20.8		0.19		29	24.7
R.3746.1	Hole (1990)	-65	-65.25	-59.5	-60	Castor Nunatak	Larsen Rift	50.88	1.97	14.91	11.29		0.14	7.96	8.84	3.36	0.96	0.32				100.03	-0.6				107				34.1	43.7	260					1.68				3.49		16.2		0.24		24	19.7
R.3713.4	Kraus et al. (2013)					Bruce Nunatak	Larsen Rift	49.5322	2.35003	14.2414		10.6182	0.15129	8.39152	9.25892	3.70155	1.26075	0.494212				100					143				51.4	37.2	308					2.1				4.38		27.6		0.24		36	27.1
R.3728.1	Kraus et al. (2013)						Larsen Rift	52.1108	1.76064	14.9958		9.4689	0.14166	8.41867	8.71211	3.37961	0.769013	0.242846				100					66				32.5	46.8	346					1.49				2.98		12.4		0.26		26	15.2
R.3728.2	Kraus et al. (2013)					Evensen Nunatak	Larsen Rift	51.6359	1.74459	14.8591		10.2938	0.14037	8.34196	8.63273	3.34882	0.762006	0.240634				100					66				26.5	46.8	346					1.49				2.98		12.4		0.21		17	15.2
R.3729.1	Kraus et al. (2013)					Larsen Nunatak	Larsen Rift	50.3151	1.96757	15.0205		11.2157	0.152132	7.98186	8.62082	3.54975	0.90265	0.273838				100					102				29	49.5	298					1.58				3.1		14.7		0.24		20	17.1
R.3731.3	Kraus et al. (2013)					Christensen Nunatak	Larsen Rift	52.732	1.85484	14.99		10.2316	0.141129	7.05647	8.64922	3.3367	0.786292	0.221775				100					111				23.5	43.3	268					1.54				3.02		12		0.26		14	16.3
R.3731.4	Kraus et al. (2013)					Christensen Nunatak	Larsen Rift	52.8896	1.95027	15.2687		10.1563	0.14147	6.27521	8.75094	3.40539	0.909451	0.252625				100					122				25.7	39.9	236					1.55				3.13		12.8		0.26		16	17.3
R.3734.1	Kraus et al. (2013)						Larsen Rift	49.6666	2.34191	14.2947		10.7643	0.152072	8.52616	8.90127	3.56862	1.30782	0.476492				100					141				50.4	49.8	247	0.3				2.04				4.16		25.5		0.19		35	26.3
R.3735.1	Kraus et al. (2013)					Pollux Nunatak	Larsen Rift	45.9893	2.67497	13.7786		11.6351	0.161508	10.3668	9.6299	3.63392	1.5848	0.545089				100					162				58	57.8	350					2.24				4.64		28.3		0.21		42	32
R.3739.2	Kraus et al. (2013)					Arktowski Nunatak	Larsen Rift	52.1246	2.05596	15.5205		9.64876	0.131017	6.59116	8.84868	3.68863	1.06829	0.322503				100					125				36	38.2	192					1.74				3.69		17.5		0.22		24	21.5
R.3740.3	Kraus et al. (2013)					Bruce Nunatak	Larsen Rift	52.433	2.17464	15.7762		9.88335	0.140949	5.61782	9.24222	3.45325	0.966506	0.312101				100					116				31.4	35.5	166					1.82				3.41		14.9		0.25		20	19.2
R.3742.3	Kraus et al. (2013)					Akerlundh Nunatak	Larsen Rift	48.6098	2.69099	15.2354		11.4605	0.141631	7.62784	8.53832	3.87462	1.32526	0.495708				100					116				41.8	52.4	146					2.05				4.08		20.8		0.19		29	24.7
R.3746.1	Kraus et al. (2013)					Castor Nunatak	Larsen Rift	51.1363	1.97992	14.9851		10.2099	0.140705	8.0001	8.88453	3.37693	0.964836	0.321612				100					107				34.1	43.7	260					1.68				3.49		16.2		0.24		24	19.7
D.8710.4	Hole et al. (1995)	-64.2	-64.2	-57.75	-57.75	James Ross Island	Larsen Rift	49.61	2.06	16.29	10.07		0.14	6.53	7.07	4.37	2.43	0.8				100.27	0.9				301				73.9	34.1	152					2.37				5.56		37.3		0.25		53	36.6
D.8711.1	Hole et al. (1995)	-64.2	-64.2	-57.75	-57.75	James Ross Island	Larsen Rift	46.74	1.91	14.51	11.55		0.15	9.91	8.65	3.08	1.39	0.44				100.83	2.5				158				42.5	49.4	316					1.75				3.71		20.1		0.29		29	23
D.8725.1	Hole et al. (1995)	-64.2	-64.2	-57.75	-57.75	James Ross Island	Larsen Rift	47.79	1.7	14.84	12.9		0.16	9.65	8.82	3.01	0.9	0.35				100.12	0				129						308															21
D.8728.1	Hole et al. (1995)	-64.2	-64.2	-57.75	-57.75	James Ross Island	Larsen Rift	49.68	2	16.44	9.82		0.14	5.12	7.77	4.42	2.16	0.67				99.52	1.3				274				59.42		104			4.07	2.22	1.93		5.35			0.81	36.2		0.25		44	26.54
D.8728.2	Hole et al. (1995)	-64.2	-64.2	-57.75	-57.75	James Ross Island	Larsen Rift	50.99	3.11	14.9	11.26		0.17	2.66	6.11	5.31	3.42	0.17				98.64	0.54				374				100.92		3			7.21	3.75	2.75		9.18			1.34	54.41		0.41		79	44.26
D.8730.1	Hole et al. (1995)	-64.2	-64.2	-57.75	-57.75	James Ross Island	Larsen Rift	48.84	1.7	15.84	12.59		0.17	7.24	7.37	3.78	1.63	0.6				99.89	0.13				132				51.9	42.7	147					1.86				4.89		25.1		0.26		32	26
D.8749.1	Hole et al. (1995)	-64.2	-64.2	-57.75	-57.75	James Ross Island	Larsen Rift	47.78	1.86	14.91	12.83		0.17	8.45	8.98	3.34	0.83	0.34				99.59	0.1				140				32.9	49.2	257					1.59				3.1		16.4		0.31		23	16.2
D.8814.1	Hole et al. (1995)	-64.2	-64.2	-57.75	-57.75	James Ross Island	Larsen Rift	49.52	2.79	14.94	11.64		0.17	3.04	7.36	4.81	2.4	0.78				99.79	2.34				304				35.68		8			7.34	1.26	7.28		2.42			6.12	37		2.79		59	72.63
D.8818.1	Hole et al. (1995)	-64.2	-64.2	-57.75	-57.75	James Ross Island	Larsen Rift	48.86	1.84	16.63	10.38		0.14	7.06	8.12	3.99	1.75	0.54				99.95	0.64				205				55.4	35.9	176					1.94				4.27		28.5		0.31		38	28.5
D.8819.1	Hole et al. (1995)	-64.2	-64.2	-57.75	-57.75	James Ross Island	Larsen Rift	49.39	1.86	16.36	10.78		0.14	6.52	8.03	4.27	1.51	0.59				99.98	0.53				248				56.8	36.7	169					1.96				4.08		31.1		0.28		42	28.2
D.8822.1	Hole et al. (1995)	-64.2	-64.2	-57.75	-57.75	James Ross Island	Larsen Rift	48.78	1.93	16.68	11.34		0.14	6.26	8.93	3.91	1.26	0.44				99.67	0				161				40.2	37.5	133					1.74				1.59		21.4		0.34		26	21.1
D.8826.3	Hole et al. (1995)	-64.2	-64.2	-57.75	-57.75	James Ross Island	Larsen Rift	47.43	1.88	15.65	11.7		0.16	8.22	8.99	3.56	0.95	0.35				99.9	1.01				149				33.07		248			4.52	2.24	1.58		4.54			0.83	16.41		0.28		24	17.44
D.8827.1	Hole et al. (1995)	-64.2	-64.2	-57.75	-57.75	James Ross Island	Larsen Rift	42.36	0.71	10.99	14.86		0.18	18.25	4.7	3.49	0.2	0.1				99.61	3.77				76				10.6	90.2	430					0.65				1.09		5		0.16		5	5.4
D.8838.1	Hole et al. (1995)	-64.2	-64.2	-57.75	-57.75	James Ross Island	Larsen Rift	48.99	2.06	17.1	9.68		0.13	4.66	7.82	4.56	2.47	0.76				100.05	1.82				246				68.95		67			4.42	2.17	2.25		5.57			0.78	34.55		0.21		56	30.45
B1	Keller et al. (1992)	-62.03	-62.03	-56.45	-56.45		South Shetland Islands	55.8	0.78	18.7		6.6	0.12	5	9.4	3.5	0.7	0.08				100.68					76						40		92				17									0.7
B2	Keller et al. (1992)	-62.03	-62.03	-56.45	-56.45		South Shetland Islands	54.3	0.63	18.3		6.3	0.12	5	9.7	3.2	0.7	0.08				98.33					84						66		53				16									0
LH1	Keller et al. (1992)	-62.05	-62.05	-58.4	-58.4	Low Head area	South Shetland Islands	50.3	0.82	16.9		8.4	0.14	7.5	11.4	2.5	0.23	0.17				98.36					85				13.6		734	1.75	83	2.8	1.7	0.9	18					4.7				0.5	8
MP372	Keller et al. (1992)	-62.05	-62.05	-58.4	-58.4	Melville Peak	South Shetland Islands	52.5	1.01	16.3		7.1	0.13	8.8	10.2	3.2	0.8	0.14				100.18					88				22.1		330	0.35	91	2.8	1.8	1.2	15					9.1				3.1	13.5
MP375	Keller et al. (1992)	-62.05	-62.05	-58.4	-58.4	Melville Peak	South Shetland Islands	53	0.96	16.8		7	0.13	7	11.1	3.4	0.88	0.13				100.4					114						172		100				19									0.9
MP405	Keller et al. (1992)	-62.05	-62.05	-58.4	-58.4	Melville Peak	South Shetland Islands	52.8	0.92	16.7		7.1	0.14	7.1	11.3	3.1	0.91	0.14				100.21					173						157		79				18									1.5
MP406	Keller et al. (1992)	-62.05	-62.05	-58.4	-58.4	Melville Peak	South Shetland Islands	53.1	0.91	16.9		7	0.14	7	11.4	3.2	0.92	0.13				100.7					191				34.7		150	0.31	76	3.4	1.9	1.2	18					15.3				1.9	19.2
P172	Keller et al. (1992)	-62.06	-62.06	-57.56	-57.56		South Shetland Islands	50.1	1.29	16.3		8.8	0.16	8.6	10.3	3.6	0.65	0.41				100.21					123						319		87				18									4.2
P174	Keller et al. (1992)	-62.06	-62.06	-57.56	-57.56		South Shetland Islands	50.6	1.3	17.2		8.7	0.16	7.9	10.2	4	0.66	0.29				101.01					146				24.3		218	0.13	154	2.8	1.5	1.1	22									2.2	14.4
P260	Keller et al. (1992)	-62.06	-62.06	-57.56	-57.56		South Shetland Islands	50.8	1.15	16.4		8.3	0.15	9.1	10.7	3.5	0.52	0.24				100.86					124						441		111				23									2.2
P261	Keller et al. (1992)	-62.06	-62.06	-57.56	-57.56		South Shetland Islands	49.1	1.25	15.9		8.6	0.16	9.8	10.1	3.7	0.61	0.28				99.5					106				23.6		377	0.05	74	2.7	1.4	1.2	19	3				9.7				3.2	13.9
P263	Keller et al. (1992)	-62.06	-62.06	-57.56	-57.56		South Shetland Islands	49.8	1.16	15.6		8.7	0.16	11	9.9	3.3	0.58	0.29				100.49					119						548		114				17									3.2
SR1	Keller et al. (1992)	-63.07	-63.07	-60.75	-60.75		South Shetland Islands	59	1.02	17.6		6.3	0.12	3.2	7	4.3	0.8	0.22				99.56					177				34.3		17	1.33	23	4.2	2.4	1.2	16					14.6				5.6	16.7
D10A	Keller et al. (2002)	-62.3	-62.3	-58.1	-58.1		Bransfield subalkaline with significant subduction influence	48.29	0.75	12.7		8.56	0.15	17.57	8.58	1.99	0.41	0.1				99.06	-0.04				138				15.68		1073	0.34	71	2.55	1.57	0.78	14	2.43		1.7	0.53	6.67		0.22		1.6	9.2
D144.1	Keller et al. (2002)	-62.6	-62.6	-59	-59		Bransfield subalkaline with minor subduction influence	70.28	0.35	12.89		4.45	0.13	0.12	1.26	7.39	1.42	0.01				99.47	1.17				125				80		5	1.2	13	22	16	2.3	29	18		23	5	28		2.6		18	57
D144.4	Keller et al. (2002)	-62.6	-62.6	-59	-59		Bransfield subalkaline with minor subduction influence	50.06	1.47	17.08		8.69	0.16	6.4	10.71	3.83	0.32	0.17				99.12	0.23				71				16.05		129	0.24	64	5.17	3.11	1.35	19	4.51		3.1	1.11	5.81		0.46		3.7	12.84
D145.3	Keller et al. (2002)	-62.8	-62.8	-59.8	-59.9		Bransfield subalkaline with minor subduction influence	51.5	1.39	17		8.5	0.16	5.85	10.61	3.91	0.37	0.16				99.57	0.12				66				16.74		37	0.26	80	4.2	2.49	1.23	19	3.85		2.67	0.89	6.53		0.36		4	12.55
D146.1	Keller et al. (2002)	-62.8	-62.8	-59.8	-59.9		Bransfield subalkaline with minor subduction influence	50.97	1.57	17.38		8.37	0.16	5.94	10.42	3.88	0.32	0.18				98.99	-0.2				46				17.63		114	0.1	58	4.96	2.96	1.49	17	4.74		3.09	1.07	6.59		0.43		3.6	13.65
D156.4	Keller et al. (2002)	-62.8	-62.8	-59.8	-59.9		Bransfield subalkaline with minor subduction influence	50.02	1.5	17.59		8.21	0.15	6.34	11.12	3.68	0.34	0.2				98.95	-0.2				60				20.17		147	0.18	66	4.48	2.62	1.41	20	4.36		3.03	0.94	7.92		0.39		5	14.63
D1A	Keller et al. (2002)	-62.6	-62.6	-59	-59		Bransfield subalkaline with minor subduction influence	54.05	1.45	15.57		8.73	0.18	4.52	8.4	4.77	0.4	0.24				98.59	0.28				38				29.48		43	0.27	49	9.28	5.99	2.03	20	7.87		6.75	2.02	9.52		0.86		6	22.98
D1F	Keller et al. (2002)	-62.6	-62.6	-59	-59		Bransfield subalkaline with minor subduction influence	52.91	1.72	15.62		9.5	0.18	5.27	9.12	4.17	0.41	0.23				99.03	-0.1				35				23.85		35	0.24	46	7.53	4.82	1.76	19	6.47		5.09	1.62	7.92		0.7		5.1	18.53
D2G	Keller et al. (2002)	-62.4	-62.4	-58.4	-58.4		Bransfield subalkaline with minor subduction influence	49.04	1.37	17.03		8.77	0.16	7.61	11.61	3.08	0.18	0.11				98.7	-0.26				20				12.17		219	0.09	69	4.67	2.9	1.3	16	3.92		2.6	1.02	4.02		0.4		2.4	10.81
D2N	Keller et al. (2002)	-62.4	-62.4	-58.4	-58.4		Bransfield subalkaline with minor subduction influence	52.15	2.75	14.8		11.94	0.22	3.93	7.83	5.04	0.39	0.34				99.08	-0.31				58				28.07		3	0.28	37	8.81	5.46	2.32	22	7.71		5.38	1.9	9.39		0.77		7	22.59
D3C	Keller et al. (2002)	-62.4	-62.4	-58.4	-58.4		Bransfield subalkaline with minor subduction influence	51.14	1.56	16.23		9.31	0.17	6.03	10.87	3.54	0.27	0.14				99.01	-0.25				39				15.14		49	0.18	70	5.57	3.42	1.5	20	4.93		3.1	1.2	5.23		0.48		3.6	12.76
D4D	Keller et al. (2002)	-62.4	-62.4	-58.4	-58.4		Bransfield subalkaline with minor subduction influence	51.91	1.95	15.66		10.54	0.19	4.8	9.23	4.37	0.32	0.2				98.79	-0.38				47				20		6	0.22	70	6.9	4.39	1.78	22	6.23		4.22	1.52	7.06		0.66		4.8	16.81
D6D	Keller et al. (2002)	-62.1	-62.1	-56.5	-56.5	east of Bridgeman Island	Bransfield subalkaline with significant subduction influence	50.11	0.69	15.79		8.09	0.14	11.21	10.6	2.22	0.31	0.03				99.06	-0.13				53				6.17		631	0.46	65	2.4	1.54	0.63	17	1.95		1.22	0.53	2.45		0.22		0.7	5.09
D7A	Keller et al. (2002)	-62.1	-62.1	-57	-57	southwest tip of a linear ridge coming off Bridgeman Island platform	Bransfield subalkaline with significant subduction influence	51.51	0.69	18.07		6.9	0.12	7.33	11.95	2.52	0.32	0.04				99.49	0.04				44				6.73		174	0.29	68	2.53	1.61	0.74	17	2.18		1.49	0.55	2.5		0.23		0.7	5.66
D7F	Keller et al. (2002)	-62.1	-62.1	-57	-57	southwest tip of a linear ridge coming off Bridgeman Island platform	Bransfield subalkaline with significant subduction influence	52.63	0.65	18.37		6.78	0.13	5.82	11.49	2.83	0.38	0.05				99.32	0.19				67				8.45		56	0.48	67	2.71	1.76	0.73	17	2.33		1.66	0.59	3.32		0.24		1	6.45
D8F	Keller et al. (2002)	-62.2	-62.2	-57.1	-57.1		Bransfield subalkaline with significant subduction influence	50.81	1.18	16.14		8.58	0.16	8.84	10.19	2.88	0.4	0.1				99.38	0.1				57				11.21		462	0.38	63	3.93	2.53	1.07	19	3.35		2.2	0.86	3.92		0.34		1.5	9.23
P615.1	Keller et al. (2002)	-62.05	-62.05	-58.4	-58.4		South Shetland Islands	47.97	0.51	20.06		7.66	0.13	6.82	12.7	2.04	0.58	0.11				99.53	0.95										79		95				18
P842.9	Keller et al. (2002)	-62.35	-62.35	-59.6	-59.6		South Shetland Islands	50.3	1.1	16.5		2.31	0.17	8.9	10.48	2.56	0.54	0.48				93.34											200
P845.9	Keller et al. (2002)	-62.5	-62.5	-60.5	-60.5		South Shetland Islands	46.57	1.33	19.7		10.82	0.17	5.09	11.47	2.59	0.3	0.17				98.55	0.34										30		56				21
P862.4	Keller et al. (2002)	-62.5	-62.5	-60.5	-60.5		South Shetland Islands	47.97	0.76	22.1		9.04	0.16	3.55	12.46	2.32	0.51	0.11				99.24	0.26										18		62				19
P864.4	Keller et al. (2002)	-62.5	-62.5	-60.5	-60.5		South Shetland Islands	49.86	1.02	16.91		9.66	0.17	6.47	11.65	2.45	0.23	0.14				98.7	0.14										113		72				16
JR1	Kosler et al. (2009)	-63.7922	-63.7922	-57.81	-57.81	Northern James Ross Island	Larsen Rift	46.76	1.61	14.7	2.11	8.75	0.19	9.93	9.03	2.93	0.57	0.31	1.19	1.51	0.14	98.54	1.65				96				41.5	47.7	592	0.22	45.1	4.73	2.88	1.71		3.77		3.13	0.98	19.3	5.9	0.38		20.4	21
JR100	Kosler et al. (2009)	-63.8177	-63.8177	-57.9417	-57.9417	Northern James Ross Island	Larsen Rift	47.58	1.56	16.01	2.05	8.65	0.18	8.79	8.61	3.44	1.16	0.5	0.35	0.92	0.02	99.47	0.94				151				49.5	43.9	493	0.3	51.6	4.66	2.56	1.77		5.13		3.61	0.92	23.7	7	0.33		29.4	23.2
JR105	Kosler et al. (2009)	-63.809	-63.809	-57.9167	-57.9167	Northern James Ross Island	Larsen Rift	48.28	1.43	15.38	1.91	8.74	0.19	9.48	8.33	3.55	0.93	0.31	0.24	1	0.04	99.57	1.04				122				33.5	45.5	599	0.48	47.7	4.08	2.23	1.46		4.43		3.17	0.81	15.5	6.1	0.29		23.6	17.3
JR16	Kosler et al. (2009)	-63.8032	-63.8032	-57.9517	-57.9517	Northern James Ross Island	Larsen Rift	45.9	1.35	15.73	2.27	7.04	0.17	7.03	6.91	4.52	2.12	0.39	0.96	5.34	0.01	98.78	5.35				162				56.4	34.7	317	0.57	34	4.68	3	1.78		4.28		3.39	0.96	28.2		0.38		29.1	24.9
JR52	Kosler et al. (2009)	-63.797	-63.797	-57.8008	-57.8008	Northern James Ross Island	Larsen Rift	46.8	1.65	15.31	2.07	8.46	0.18	9.32	8.19	3.41	1.21	0.32	0.38	2.41	0.02	99.35	2.43				106				42.3	43.1	504	0.38	42.3	4.81	2.89	1.69		3.88		3.24	1	20.1	6	0.37		21.3	20.9
JR53	Kosler et al. (2009)	-63.811	-63.811	-57.8892	-57.8892	Northern James Ross Island	Larsen Rift	48.38	1.6	15.4	2.03	8.44	0.18	8.72	8.38	3.06	1.33	0.43	0.43	1.5	0.03	99.48	1.53				145				50.5	43.2	459	0.14	53.1	4.8	3	1.87		4.85		4.72	0.94	25	4.6	0.35		35.2	24.1
JR59	Kosler et al. (2009)	-63.8088	-63.8088	-57.8245	-57.8245	Northern James Ross Island	Larsen Rift	48.38	1.52	15.09	2.38	9.09	0.18	8.94	7.33	3.43	1.22	0.41	0.46	1.41	0.02	99.4	1.43				141				47	45.1	418	0.24	42.8	4.45	2.7	1.7		4.2		3.59	0.86	23.5	6.9	0.32		31.3	22.7
JR61A	Kosler et al. (2009)	-63.8123	-63.8123	-57.8317	-57.8317	Northern James Ross Island	Larsen Rift	48.51	1.47	15.48	2.61	8.79	0.18	8.53	7.75	3.55	1.37	0.4	0.15	0.99	0.02	99.65	1.01				138				45.2	46.6	431	0.19	42.2	4.3	2.67	1.66		4.26		3.57	0.84	22.3	6.3	0.3		30.5	21.4
JR61B	Kosler et al. (2009)	-63.8123	-63.8123	-57.8317	-57.8317	Northern James Ross Island	Larsen Rift	48.94	1.52	15.52	1.9	9.64	0.18	8.54	7.78	3.8	1.26	0.41	0.1	0.28	0.01	99.78	0.29				139				46.6	46.4	429	0.15	40.1	4.44	2.67	1.69		4.33		3.64	0.88	22.8	6.9	0.31		31.3	21.9
JR68	Kosler et al. (2009)	-63.869	-63.869	-58.108	-58.108	Northern James Ross Island	Larsen Rift	46.6	1.53	15.62	2.79	7.76	0.18	8.85	8.41	2.84	0.71	0.26	1.28	2.85	0.04	98.44	2.89				88				32.7	43.4	515	0.35	47.5	4.74	2.83	1.68		3.91		3.06	0.97	15	6.7	0.36		16.4	18.6
JR70	Kosler et al. (2009)	-63.8745	-63.8745	-58.079	-58.079	Northern James Ross Island	Larsen Rift	48.36	1.47	15.45	2.49	8.13	0.18	9.29	8.78	3.22	1.03	0.25	0.15	1.06	0.02	99.73	1.08				129				41	47	582	0.39	49.9	4.75	2.81	1.65		4.1		3.41	0.95	19.3	5.4	0.35		22.3	21
JR71C	Kosler et al. (2009)	-63.852	-63.852	-58.059	-58.059	Northern James Ross Island	Larsen Rift	47.7	1.63	15.91	2.03	7.75	0.18	8.32	8.43	4.09	1.49	0.5	0.25	1.57	0.09	99.69	1.66				183				57.7	39.8	533	0.46	45	4.96	3.19	1.94		5.18		4.35	0.99	29.3	6.6	0.37		41.3	26.3
JR91	Kosler et al. (2009)	-63.8862	-63.8862	-57.903	-57.903	Northern James Ross Island	Larsen Rift	48.52	1.8	16.49	1.87	7.72	0.17	6.75	8.92	3.96	1.36	0.5	0.19	1.55	0.06	99.67	1.61				214				65.2	33.9	271	0.56	48.7	5.43	3.42	2.17		5.94		4.43	1.05	32.6	7.3	0.38		43.7	30.8
JR96	Kosler et al. (2009)	-63.8272	-63.8272	-57.9365	-57.9365	Northern James Ross Island	Larsen Rift	48.26	1.71	16.47	2.17	8.23	0.18	7.55	9.59	3.42	1.02	0.37	0.1	0.68	0.02	99.67	0.7				108				44.4	40.6	432	0.2	57.3	4.97	2.99	1.87		4.48		3.54	1.01	20.2	4.6	0.38		24.5	22
BI-01	Kraus et al. (2013)	-62.0647	-62.0647	-56.7117	-56.7117		South Shetland Islands	55.5993	0.701087	18.1165		6.50952	0.1138	5.24291	9.59169	3.00756	0.802694	0.314981				100		< 0,5	< 5		115	1	< 0,4		11.6	25	90	1.2	70	2.6	1.7	0.74	17	2.6	1	2.4	0.5	5		0.23	2	1	7.8
BI-02	Kraus et al. (2013)	-62.0647	-62.0647	-56.7117	-56.7117		South Shetland Islands	56.686	0.802064	17.9111		6.94116	0.126695	4.00521	8.43955	3.3513	0.919564	0.81739				100		< 0,5	< 5		140	1	< 0,4		18.2	20	30	1	70	3	1.9	0.88	18	3.1	1	2.7	0.6	8		0.25	< 2	1	10.6
BI-03	Kraus et al. (2013)	-62.0632	-62.0632	-56.7127	-56.7127		South Shetland Islands	57.0261	0.734873	18.6763		6.67851	0.108131	4.43023	8.80797	2.8975	0.524909	0.11548				100		< 0,5	< 5		157	1	< 0,4		18	24	70	< 0,5	80	3.4	2.2	0.96	17	3.5	1	2.9	0.7	7.6		0.29	< 2	1	11.7
BI-04	Kraus et al. (2013)	-62.0625	-62.0625	-56.7134	-56.7134		South Shetland Islands	67.7655	0.931762	15.3967		6.04682	0.0663176	2.74113	4.36591	1.93426	0.652123	0.0994763				100		< 0,5	< 5		115	< 1	< 0,4		11.9	13	50	1	40	1.7	1.1	0.52	15	1.7	1	2.4	0.4	5.5		0.15	< 2	< 1	6.5
BI-05	Kraus et al. (2013)	-62.0626	-62.0626	-56.714	-56.714		South Shetland Islands	54.5967	0.724179	18.3259		7.07231	0.130826	5.7481	10.2086	2.63712	0.473858	0.0824101				100		< 0,5	< 5		105	1	< 0,4		13.6	27	60	0.8	70	2.6	1.6	0.79	18	2.6	1	2	0.6	6		0.21	< 2	< 1	8.4
BI-06	Kraus et al. (2013)	-62.0626	-62.0626	-56.714	-56.714		South Shetland Islands	57.4023	1.01572	20.9139		7.41147	0.102127	4.52913	6.16095	1.83163	0.521738	0.111008				100		< 0,5	< 5		134	1	1.6		10.1	22	80	0.8	50	2.1	1.3	0.56	19	1.9	1	2.8	0.4	4.5		0.18	4	1	6.3
BI-07	Kraus et al. (2013)	-62.0635	-62.0635	-56.7163	-56.7163		South Shetland Islands	54.7008	0.711769	17.9666		6.99751	0.125726	5.72863	10.1594	2.90994	0.618489	0.0811133				100		< 0,5	< 5		107	1	< 0,4		11.2	25	60	0.7	40	2.3	1.5	0.71	17	2.2	1	2	0.5	5		0.2	< 2	< 1	7.1
BI-08	Kraus et al. (2013)	-62.0635	-62.0635	-56.7163	-56.7163		South Shetland Islands	56.1735	0.743517	16.9846		7.04516	0.126449	5.49292	9.77194	2.90326	0.667648	0.0910429				100		< 0,5	< 5		110	1	< 0,4		13.5	25	70	1	80	2.6	1.6	0.76	17	2.6	1	1.9	0.5	5.8		0.21	< 2	< 1	8.2
CP-01	Kraus et al. (2013)	-63.5406	-63.5406	-55.9703	-55.9703	Cape Purvis	Larsen Rift	48.8916	1.80579	16.8613		10.8106	0.164382	7.94111	8.75094	2.93712	1.30539	0.531825				100		< 0,5	< 5		150	2	< 0,4		42.2	42	200	< 0,5	50	3.8	2.3	1.42	15	4	1	2.9	0.8	22.3		0.29	< 2	19	18.4
CP-02	Kraus et al. (2013)	-63.5406	-63.5406	-55.9703	-55.9703	Cape Purvis	Larsen Rift	47.4721	1.63253	14.8007		11.4045	0.171136	12.5189	7.52998	2.93524	1.04756	0.487478				100		< 0,5	< 5		153	2	< 0,4		39.6	56	370	< 0,5	50	3.9	2.3	1.44	16	4.2	1	3.4	0.8	19.5		0.31	3	21	18.2
CP-03	Kraus et al. (2013)	-63.5406	-63.5406	-55.9703	-55.9703	Cape Purvis	Larsen Rift	48.9144	1.86531	16.8418		10.0668	0.15611	7.49526	8.85622	3.8427	1.34094	0.620436				100		0.7	< 5		183	2	< 0,4		65.1	51	310	< 0,5	70	4.8	2.8	1.95	21	5.4	2	4.2	1	33.3		0.33	6	33	25
CP-04	Kraus et al. (2013)	-63.5393	-63.5393	-55.9706	-55.9706	Cape Purvis	Larsen Rift	49.0187	1.76035	16.3031		9.36021	0.17374	10.3042	8.09694	3.29997	1.25661	0.426155				100		< 0,5	< 5		165	2	< 0,4		39.1	39	250	< 0,5	40	3.2	1.9	1.28	13	3.5	< 1	2.6	0.7	19.8		0.26	< 2	18	16.6
CP-05	Kraus et al. (2013)	-63.5457	-63.5457	-55.9671	-55.9671	Cape Purvis	Larsen Rift	48.2226	1.80357	16.315		10.8094	0.172072	9.03908	8.45489	3.31398	1.27461	0.594816				100		< 0,5	< 5		168	2	< 0,4		48.1	43	250	< 0,5	50	4.3	2.5	1.62	18	4.5	1	4.1	0.9	24.1		0.24	2	27	20.4
CP-06	Kraus et al. (2013)	-63.5457	-63.5457	-55.9671	-55.9671	Cape Purvis	Larsen Rift	48.0455	1.87559	16.7079		10.4543	0.166268	8.10051	9.12448	3.60924	1.30784	0.608299				100		< 0,5	< 5		181	2	< 0,4		54.7	42	220	< 0,5	50	4.6	2.7	1.77	19	5.1	1	4.1	0.9	27.5		0.27	< 2	31	22.6
CP-07	Kraus et al. (2013)	-63.563	-63.563	-56.0308	-56.0308	Cape Purvis	Larsen Rift	47.7802	2.19005	15.5521		10.4953	0.168076	8.42406	9.94282	3.53365	1.37701	0.536629				100		< 0,5	< 5		196	2	< 0,4		50.9	44	270	0.6	60	4.9	2.7	1.88	19	5.3	1	4.2	1	24.6		0.31	3	32	22.7
CP-08	Kraus et al. (2013)	-63.564	-63.564	-56.0294	-56.0294	Cape Purvis	Larsen Rift	49.1131	1.86326	17.3567		10.3054	0.167086	6.20749	9.49857	3.72652	1.21517	0.546826				100		< 0,5	< 5		174	2	< 0,4		49.4	37	160	0.6	50	4.9	3	1.75	20	5.1	1	3.9	1	24.5		0.37	3	27	21.2
IP-01	Kraus et al. (2013)	-62.5247	-62.5247	-60.0076	-60.0076	Inott Point	South Shetland Islands	48.127	1.31842	16.3666		9.35161	0.159648	10.7207	9.76919	3.11895	0.761236	0.306609				100		< 0,5	< 5		188	< 1	< 0,4		28.7	39	440	< 0,5	100	2.9	1.6	1.08	17	3.2	1	2.4	0.6	12.5		0.23	< 2	5	15.7
IP-02A	Kraus et al. (2013)	-62.5275	-62.5275	-60.0154	-60.0154	Inott Point	South Shetland Islands	47.3761	1.3656	16.4557		9.61929	0.162794	10.1928	10.9912	2.88259	0.570297	0.383655				100		< 0,5	< 5		194	1	< 0,4		33.1	43	460	< 0,5	110	2.8	1.5	1.09	18	3.1	2	2.2	0.5	14.5		0.22	< 2	5	16.9
IP-02B	Kraus et al. (2013)	-62.5275	-62.5275	-60.0154	-60.0154	Inott Point	South Shetland Islands	48.4507	1.3661	17.0637		9.23039	0.160599	8.27085	11.2118	3.34247	0.572134	0.331236				100		< 0,5	< 5		190	1	< 0,4		29.6	37	270	< 0,5	100	3	1.6	1.14	20	3.3	2	2.3	0.6	12.9		0.24	< 2	5	15.7
IP-03A	Kraus et al. (2013)	-62.5333	-62.5333	-60.3662	-60.3662	Inott Point	South Shetland Islands	48.2599	1.43323	18.4402		8.90175	0.155677	7.01049	11.3895	3.51529	0.57249	0.321398				100		< 0,5	< 5		189	1	< 0,4		28.9	33	200	< 0,5	110	3.1	1.7	1.15	21	3.3	2	2.3	0.6	12.5		0.25	< 2	5	15.6
IP-03B	Kraus et al. (2013)	-62.5333	-62.5333	-60.3662	-60.3662	Inott Point	South Shetland Islands	48.8105	1.36381	17.3575		9.02534	0.160567	7.45927	11.4531	3.45525	0.60975	0.304875				100		< 0,5	< 5		186	< 1	< 0,4		27.9	34	200	< 0,5	150	3	1.7	1.12	21	3.4	2	2.3	0.6	12.1		0.25	< 2	5	15.4
JD-01	Kraus et al. (2013)	-62.6512	-62.6512	-60.37	-60.37	Hurd Peninsula (Johnson's Dock)	South Shetland Islands	53.6889	1.89017	16.4887		9.61662	0.167904	4.46402	8.40523	4.34337	0.623354	0.311677				100		< 0,5	< 5		103	2	< 0,4		28.3	71	50	0.5	70	5.6	3.5	1.66	19	5.3	1	4.6	1.2	12.4		0.46	< 2	6	17.2
JD-02	Kraus et al. (2013)	-62.6512	-62.6512	-60.37	-60.37	Hurd Peninsula (Johnson's Dock)	South Shetland Islands	55.0602	1.90741	16.8815		7.8005	0.169525	4.45639	8.44582	4.40563	0.619225	0.253781				100		< 0,5	8		109	2	< 0,4		24.9	45	30	< 0,5	40	4.8	2.8	1.39	16	4.3	1	3.6	1	10.5		0.41	< 2	5	14.4
KK-01	Kraus et al. (2013)	-62.6483	-62.6483	-60.3497	-60.3497	Hurd Peninsula (Krumov Kamak)	South Shetland Islands	54.2176	1.88509	16.3448		9.49075	0.167071	4.31768	8.23278	4.40826	0.624	0.312				100		< 0,5	< 5		108	2	< 0,4		26.7	56	20	< 0,5	50	5	3	1.48	18	4.7	1	4	1	11.2		0.44	< 2	6	15.4
LIT-01	Kraus et al. (2013)	-62.6347	-62.6347	-60.3387	-60.3387	Hurd Peninsula (Perunika Glacier)	South Shetland Islands	55.5561	2.04198	16.3155		9.36557	0.171099	3.65622	7.22077	4.583	0.743464	0.346271				100		0.9	< 5		127	2	< 0,4		33.1	26	< 20	0.7	60	6.3	3.7	1.78	21	5.8	2	5.3	1.3	13.4		0.62	< 2	9	20.4
LIT-02	Kraus et al. (2013)	-62.6347	-62.6347	-60.3387	-60.3387	Hurd Peninsula (Perunika Glacier)	South Shetland Islands	56.0695	2.02732	15.7135		9.33282	0.171365	3.66782	7.31559	4.61984	0.74158	0.340726				100		0.9	< 5		127	2	< 0,4		33	27	< 20	0.7	70	6.5	3.8	1.8	21	6	2	5.5	1.3	13.4		0.63	< 2	8	20.8
LIT-03	Kraus et al. (2013)	-62.6334	-62.6334	-60.3386	-60.3386	Hurd Peninsula (Perunika Glacier)	South Shetland Islands	54.3913	1.90882	16.4761		9.1844	0.166771	4.41038	8.25816	4.29987	0.592739	0.311439				100		0.7	< 5		108	1	< 0,4		28.9	28	< 20	0.5	50	5.7	3.3	1.65	20	5.3	2	4.5	1.1	11.6		0.53	< 2	7	17.8
LIT-04 (1)	Kraus et al. (2013)	-62.6334	-62.6334	-60.3386	-60.3386	Hurd Peninsula (Perunika Glacier)	South Shetland Islands	54.9872	1.79609	16.0993		8.6328	0.165698	4.42885	8.73495	4.27542	0.572784	0.306848				100		0.7	< 5		101	1	< 0,4		27.5	27	30	< 0,5	50	5.5	3.2	1.59	19	5	2	4.3	1.1	11		0.52	< 2	6	17.3
LIT-04 (2)	Kraus et al. (2013)	-62.6337	-62.6337	-60.3407	-60.3407	Hurd Peninsula (Perunika Glacier)	South Shetland Islands	54.6234	1.8973	16.19		9.37673	0.168603	4.26587	8.19656	4.35728	0.60941	0.314862				100		0.7	< 5		109	1	< 0,4		29.2	27	< 20	0.5	50	5.8	3.4	1.69	20	5.4	2	4.6	1.2	11.8		0.56	< 2	8	18.4
LIT-05	Kraus et al. (2013)	-62.6338	-62.6338	-60.3409	-60.3409	Hurd Peninsula (Perunika Glacier)	South Shetland Islands	54.7346	1.8776	16.1169		9.2601	0.168477	4.32356	8.2513	4.32356	0.608952	0.334923				100		0.7	< 5		109	1	< 0,4		28.8	27	< 20	0.5	50	5.7	3.4	1.68	20	5.5	2	4.6	1.2	11.4		0.54	< 2	8	17.9
LIT-06	Kraus et al. (2013)	-62.6338	-62.6338	-60.3411	-60.3411	Hurd Peninsula (Perunika Glacier)	South Shetland Islands	53.8782	1.87557	16.9462		9.21113	0.166718	4.40175	8.3867	4.26959	0.569279	0.294805				100		0.7	< 5		102	1	< 0,4		28.1	28	30	0.6	50	5.7	3.3	1.69	20	5.3	2	4.4	1.1	11.3		0.53	< 2	7	18.2
LIT-07	Kraus et al. (2013)	-62.6338	-62.6338	-60.3411	-60.3411	Hurd Peninsula (Perunika Glacier)	South Shetland Islands	54.6426	1.91504	16.3317		9.43978	0.168914	4.19232	7.97762	4.38566	0.630883	0.315442				100		0.7	< 5		107	1	< 0,4		29.4	27	20	0.7	50	5.9	3.4	1.69	19	5.4	2	4.6	1.2	11.8		0.54	< 2	7	18.2
LIT-08	Kraus et al. (2013)	-62.6337	-62.6337	-60.3411	-60.3411	Hurd Peninsula (Perunika Glacier)	South Shetland Islands	53.9976	1.98912	16.8341		9.2883	0.170176	4.30024	8.20307	4.29005	0.611409	0.315895				100		0.7	< 5		103	1	< 0,4		28.7	27	20	0.6	40	5.7	3.3	1.67	19	5.4	2	4.5	1.2	11.5		0.55	< 2	7	17.8
MP-01	Kraus et al. (2013)	-62.0248	-62.0248	-57.6914	-57.6914	Melville Peak	South Shetland Islands	51.1284	0.942298	16.8033		7.509	0.141653	7.65746	12.2766	2.63802	0.769852	0.133441				100		< 0,5	< 5		216	1	< 0,4		32.3	30	160	< 0,5	80	3.5	2.2	1.24	17	3.7	1	2.5	0.7	14.7		0.27	< 2	1	16.9
MP-02	Kraus et al. (2013)	-62.0232	-62.0232	-57.6927	-57.6927	Melville Peak	South Shetland Islands	51.5149	0.929257	14.8316		7.38473	0.129852	11.636	10.2868	2.59705	0.578249	0.111592				100		< 0,5	< 5		108	1	< 0,4		23.5	39	450	< 0,5	90	3.1	1.9	1.08	16	3.3	1	2.5	0.7	10		0.23	< 2	< 1	13.6
MP-03	Kraus et al. (2013)	-62.0237	-62.0237	-57.6874	-57.6874	Melville Peak	South Shetland Islands	51.5262	0.911941	16.0128		7.35646	0.137458	9.5605	11.0582	2.58503	0.718064	0.133355				100		< 0,5	< 5		153	1	< 0,4		27.4	34	310	< 0,5	80	3.4	2.1	1.17	16	3.6	1	2.5	0.7	11.9		0.26	< 2	1	15
MP-04	Kraus et al. (2013)	-62.0237	-62.0237	-57.6874	-57.6874	Melville Peak	South Shetland Islands	52.0096	0.985835	15.4645		7.30038	0.130375	9.98873	10.6105	2.69776	0.69199	0.120346				100		< 0,5	< 5		110	1	< 0,4		24.2	35	360	< 0,5	90	3.3	2	1.13	17	3.5	1	2.5	0.7	10.3		0.25	< 2	1	14.1
MP-05A	Kraus et al. (2013)	-62.0222	-62.0222	-57.6944	-57.6944	Melville Peak	South Shetland Islands	51.1167	0.837046	13.9575		7.34893	0.124947	13.856	9.95516	2.23483	0.477441	0.091425				100		< 0,5	< 5		95	1	< 0,4		20.5	44	620	< 0,5	70	2.8	1.7	0.97	14	3	1	2.1	0.6	8.7		0.2	< 2	< 1	11.6
MP-05B	Kraus et al. (2013)	-62.0222	-62.0222	-57.6944	-57.6944	Melville Peak	South Shetland Islands	52.5528	0.993018	16.197		7.16666	0.122455	9.4877	9.86844	2.77839	0.720324	0.113194				100		< 0,5	< 5		115	1	0.5		22	35	410	< 0,5	80	3.1	1.9	1.11	16	3.3	1	2.5	0.7	9.3		0.23	2	2	13.4
MP-06A	Kraus et al. (2013)	-62.0202	-62.0202	-57.6708	-57.6708	Melville Peak	South Shetland Islands	50.3366	0.743586	12.3762		7.78615	0.150138	15.9572	9.98212	2.15062	0.415921	0.101444				100		< 0,5	< 5		84	< 1	< 0,4		16.8	53	780	< 0,5	90	2.7	1.5	0.83	13	2.6	2	1.8	0.5	7		0.23	< 2	1	10.1
MP-07B	Kraus et al. (2013)	-62.0202	-62.0202	-57.6708	-57.6708	Melville Peak	South Shetland Islands	50.5705	0.764966	12.736		7.41893	0.131195	15.1782	10.5864	2.05875	0.444044	0.111011				100		< 0,5	< 5		82	< 1	< 0,4		16.3	50	820	< 0,5	80	2.7	1.5	0.86	13	2.6	2	1.9	0.5	6.8		0.22	< 2	1	9.9
MP-10	Kraus et al. (2013)	-62.0198	-62.0198	-57.6596	-57.6596	Melville Peak	South Shetland Islands	51.5171	0.889337	15.7825		7.27725	0.129926	10.4646	10.5653	2.57837	0.674809	0.120861				100		< 0,5	< 5		140	< 1	< 0,4		21.9	37	440	< 0,5	80	3.1	1.8	1.02	15	3.1	2	2.3	0.6	9.4		0.28	< 2	1	12.7
MP-11	Kraus et al. (2013)	-62.0198	-62.0198	-57.6589	-57.6589	Melville Peak	South Shetland Islands	51.3655	0.873871	15.6349		7.56253	0.135768	10.9907	10.2041	2.3921	0.711165	0.129303				100		< 0,5	< 5		147	< 1	< 0,4		21.6	38	460	< 0,5	80	3	1.7	0.97	15	3	1	2.2	0.6	9.3		0.27	< 2	1	12.9
PAI-01	Kraus et al. (2013)	-63.5817	-63.5817	-55.797	-55.797		Larsen Rift	47.5842	2.39211	17.2827		9.79135	0.164155	6.61781	9.54988	4.19162	1.49701	0.929177				100		< 0,5	< 5		227	3	< 0,4		76.4	35	100	1	40	5.4	3	2.33	20	6.2	1	4.9	1	39		0.35	5	44	31.5
PAI-02A	Kraus et al. (2013)	-63.5754	-63.5754	-55.784	-55.784		Larsen Rift	46.9762	2.32036	16.6205		9.7263	0.157468	7.81243	9.78332	4.11448	1.42229	1.06672				100		< 0,5	< 5		215	2	< 0,4		76.1	40	220	< 0,5	30	5.4	3	2.37	20	6.3	1	4.9	1.1	39.2		0.34	4	44	30.6
PAI-02B-1	Kraus et al. (2013)	-63.5754	-63.5754	-55.784	-55.784		Larsen Rift	47.3253	2.37799	17.1313		9.84528	0.162136	6.46504	9.62618	4.23185	1.4888	1.34603				100		< 0,5	< 5		227	3	< 0,4		77.8	35	120	< 0,5	40	5.5	3.1	2.41	20	6.5	1	5.1	1.1	40.1		0.36	5	45	32.4
PAI-02B-2	Kraus et al. (2013)	-63.5754	-63.5754	-55.784	-55.784		Larsen Rift	46.6458	2.22366	15.6778		10.3622	0.161164	9.08843	9.46584	3.8557	1.38724	1.13223				100		< 0,5	< 5		214	2	< 0,4		73	44	320	< 0,5	40	5.1	2.8	2.22	19	6.1	1	4.5	1	38		0.32	3	42	29.9
PAI-03	Kraus et al. (2013)	-63.5766	-63.5766	-55.7778	-55.7778		Larsen Rift	47.4806	2.22046	16.1126		9.6501	0.147962	8.69406	9.38796	4.05111	1.34697	0.908183				100		0.5	< 5		215	2	< 0,4		85.9	52	430	< 0,5	70	5.3	2.9	2.42	21	6.7	2	4.7	1	45.3		0.34	6	44	32.6
PAI-04A	Kraus et al. (2013)	-63.5817	-63.5817	-55.7912	-55.7912		Larsen Rift	48.1018	2.31003	17.3964		9.70666	0.157594	6.87314	9.18113	4.03644	1.38276	0.854059				100		0.9	< 5		230	2	< 0,4		77.9	37	120	< 0,5	70	5.6	2.9	2.33	21	6.5	2	5.1	1	40.4		0.42	4	48	34
PAI-04B	Kraus et al. (2013)	-63.5817	-63.5817	-55.7912	-55.7912		Larsen Rift	48.0964	2.30271	17.1297		9.76923	0.164628	7.27281	8.95035	3.90731	1.46915	0.937755				100		0.9	< 5		228	2	< 0,4		76.4	38	130	0.6	40	5.3	2.7	2.29	21	6.2	1	4.9	1	39.3		0.38	4	51	32.8
PAI-05A	Kraus et al. (2013)	-63.5815	-63.5815	-55.7928	-55.7928		Larsen Rift	47.9899	2.36239	17.4841		9.52165	0.156544	6.79035	9.24016	4.15756	1.46379	0.833546				100		1	< 5		229	2	< 0,4		76.9	37	110	< 0,5	40	5.6	2.8	2.38	21	6.4	2	5	1	39.5		0.4	4	53	33.7
PAI-05B	Kraus et al. (2013)	-63.5815	-63.5815	-55.7928	-55.7928		Larsen Rift	48.2016	2.2728	17.0028		9.61684	0.157621	7.19974	9.28441	3.9863	1.43385	0.844037				100		0.9	< 5		225	2	< 0,4		75.6	38	130	< 0,5	30	5.3	2.8	2.26	20	6.1	2	4.9	1	38.8		0.39	4	47	32.2
PG-01	Kraus et al. (2013)	-62.6339	-62.6339	-60.3375	-60.3375	Hurd Peninsula (Perunika Glacier)	South Shetland Islands	55.5845	2.04807	15.9702		9.6504	0.174499	3.59202	7.20446	4.66351	0.775551	0.336752				100		< 0,5	< 5		126	2	< 0,4		32.6	23	< 20	0.6	70	6.1	3.8	1.74	19	5.7	1	5.5	1.3	14.3		0.51	< 2	7	19.3
PG-02	Kraus et al. (2013)	-62.6339	-62.6339	-60.3375	-60.3375	Hurd Peninsula (Perunika Glacier)	South Shetland Islands	56.2717	2.0642	16.3011		8.47948	0.171432	3.65922	7.21818	4.79207	0.771944	0.270682				100		< 0,5	< 5		131	2	< 0,4		31.1	47	< 20	0.6	60	5.7	3.4	1.63	17	5.2	1	4.5	1.1	13.1		0.5	< 2	7	18
PG-03	Kraus et al. (2013)	-62.6363	-62.6363	-60.3287	-60.3287	Hurd Peninsula (Perunika Glacier)	South Shetland Islands	57.1133	1.81181	16.5035		8.29383	0.16248	3.39266	6.57073	4.91528	0.878823	0.35766				100		< 0,5	7		142	2	< 0,4		31.8	28	30	1.2	30	5.4	3.3	1.61	17	4.9	1	5	1.1	13.3		0.49	< 2	7	18.5
PG-04	Kraus et al. (2013)	-62.636	-62.636	-60.3305	-60.3305	Hurd Peninsula (Perunika Glacier)	South Shetland Islands	58.0403	1.82418	16.656		7.24499	0.161649	3.37622	6.48644	4.96202	0.931018	0.31716				100		< 0,5	6		148	2	< 0,4		33.8	25	30	1.3	30	5.7	3.5	1.73	17	5	< 1	5.3	1.2	14.5		0.52	< 2	7	19.1
PG-05	Kraus et al. (2013)	-62.6362	-62.6362	-60.3303	-60.3303	Hurd Peninsula (Perunika Glacier)	South Shetland Islands	57.0292	1.80211	16.3323		8.58954	0.161675	3.35708	6.51851	4.97384	0.875313	0.360423				100		< 0,5	5		141	2	< 0,4		36.4	33	40	1.3	30	6.4	4.2	1.84	19	6.1	1	5.4	1.4	16.1		0.55	< 2	7	21.3
PI-01	Kraus et al. (2013)	-62.6339	-62.6339	-60.3375	-60.3375	Hurd Peninsula (Perunika Glacier)	South Shetland Islands	50.1435	1.32356	17.9413		8.64375	0.151732	7.13552	9.80109	3.79331	0.738158	0.32807				100		< 0,5	< 5		182	2	< 0,4		29.6	64	220	< 0,5	90	2.8	1.6	1.21	24	3.4	1	2.4	0.6	12.8		0.19	4	4	14.3
PI-02	Kraus et al. (2013)	-62.6339	-62.6339	-60.3375	-60.3375	Hurd Peninsula (Perunika Glacier)	South Shetland Islands	47.8268	1.09607	14.0252		9.33855	0.16344	15.1693	8.88708	2.73763	0.490321	0.265591				100		< 0,5	< 5		143	1	< 0,4		18.8	54	700	< 0,5	100	2.4	1.3	0.94	16	2.5	1	1.8	0.5	8		0.13	< 2	3	10.6
PI-03	Kraus et al. (2013)	-62.6363	-62.6363	-60.3287	-60.3287	Hurd Peninsula (Perunika Glacier)	South Shetland Islands	49.6184	1.26685	16.5696		8.74839	0.158859	8.99868	10.5571	3.20735	0.593209	0.281523				100		< 0,5	< 5		168	1	< 0,4		24.9	37	320	< 0,5	140	2.7	1.5	1.1	20	3.2	1	2.2	0.5	10.6		0.17	< 2	3	13.4
PI-04	Kraus et al. (2013)	-62.636	-62.636	-60.3305	-60.3305	Hurd Peninsula (Perunika Glacier)	South Shetland Islands	49.3815	1.31924	17.0781		8.12645	0.166229	9.40197	10.4184	3.26104	0.582329	0.264695				100		< 0,5	< 5		169	2	< 0,4		23.5	56	360	< 0,5	130	2.6	1.5	1.05	18	3	1	2	0.5	10.8		0.17	< 2	3	12.7
PI-05	Kraus et al. (2013)	-62.6362	-62.6362	-60.3303	-60.3303	Hurd Peninsula (Perunika Glacier)	South Shetland Islands	50.1309	1.12309	16.9365		8.72192	0.159078	9.58712	9.42804	3.0437	0.604498	0.265131				100		< 0,5	< 5		160	1	< 0,4		19.2	40	390	< 0,5	120	2.3	1.3	0.9	17	2.6	1	1.8	0.4	8.8		0.17	< 2	3	10.6
PI-06	Kraus et al. (2013)	-62.1013	-62.1013	-57.92	-57.92		South Shetland Islands	49.5818	1.25606	16.219		8.51308	0.152434	9.8879	10.4875	3.07917	0.528438	0.294706				100		< 0,5	< 5		163	1	< 0,4		25.2	38	450	< 0,5	60	2.8	1.6	1.14	20	3.3	1	2.2	0.6	10.8		0.19	< 2	3	13.6
RP-01	Kraus et al. (2013)	-62.626	-62.626	-60.279	-60.279	Rezen Peak	South Shetland Islands	50.5965	0.992463	18.063		8.569	0.153536	6.3622	11.0586	3.55239	0.441541	0.210735				100		< 0,5	< 5		161	1	< 0,4		15.6	52	150	< 0,5	120	2.7	1.7	0.87	19	2.5	1	1.5	0.5	7.7		0.22	< 2	2	8.9
SN-01	Kraus et al. (2013)	-64.9667	-64.9667	-60.1334	-60.1334	Larsen Nunatak	Larsen Rift	50.4895	2.08219	15.3488		11.185	0.153488	7.50274	8.60341	3.41309	0.918908	0.302937				100		< 0,5	< 5		98	1	< 0,4		31.8	47	240	< 0,5	50	4.2	2	1.55	21	4.6	2	3.5	0.8	15.3		0.26	2	26	16.8
SR-01	Kraus et al. (2013)	-63.049	-63.049	-60.9588	-60.9588		South Shetland Islands	56.5267	1.06772	18.7524		6.46395	0.116101	3.81475	8.3966	3.93915	0.7049	0.21769				100		6.8	< 5		133	2	0.8		30	20	50	7.4	20	4.2	2.6	1.3	19	4	1	4.3	0.9	13.4		0.34	3	6	15.9
1	Le Masurier & Thomson (1990)	-62.13	-62.13	-58.25	-58.25	Cinder Spur, Krakow Peninsula	South Shetland Islands	50.51	0.79	18.35	1.85	6.16	0.18	5.2	10.63	3.45	0.71	0.18				98.01					214				20		35						25					9				1
2	Le Masurier & Thomson (1990)	-62.13	-62.13	-58.25	-58.25	Cinder Spur, Krakow Peninsula	South Shetland Islands	52.07	0.73	18.19	1.68	5.61	0.19	5.76	9.42	3.54	0.77	0.2				98.16					232				16		80						24					7				0
3	Le Masurier & Thomson (1990)	-62.13	-62.13	-58.25	-58.25	Cinder Spur, Krakow Peninsula	South Shetland Islands	54.12	0.85	18.02	1.58	5.27	0.16	5.38	7.84	3.7	1.02	0.14				98.08					325				19		28						26					8				0
4	Le Masurier & Thomson (1990)	-62.13	-62.13	-58.25	-58.25	Cinder Spur, Krakow Peninsula	South Shetland Islands	58.88	0.52	16.85	1.77	4.43	0.24	3.97	6.15	3.9	0.75	0.33				97.79					312				31		10						25					14				3
5	Le Masurier & Thomson (1990)	-62.13	-62.13	-58.25	-58.25	Martins Head, Krakow Peninsula	South Shetland Islands	51.52	0.75	17.7	2	6.65	0.19	5.18	9.53	3.71	0.8	0.22				98.25					234				25		43						24					12				3
6	Le Masurier & Thomson (1990)	-62.13	-62.13	-58.25	-58.25	Martins Head, Krakow Peninsula	South Shetland Islands	52.02	0.91	18.51	1.82	6.06	0.18	5.62	9.45	3.82	0.82	0.19				99.4					232				21		33						23					11				0
7	Le Masurier & Thomson (1990)	-62.13	-62.13	-58.25	-58.25	Martins Head, Krakow Peninsula	South Shetland Islands	57.18	0.59	18.24	1.71	4.28	0.17	4.2	7.06	4.36	0.94	0.26				98.99					408				31		20						25					13				1
27788	Le Masurier & Thomson (1990)	-63.58	-63.58	-55.77	-55.77		Larsen Rift	46.41	2.6	16.33	2.18	7.83	0.16	8.11	9.6	4.3	1.34	0.83	0.13	0.09		99.78	0.09				205				108.9					7.9	4.4	3.39		9.51				53.8		0.51			49.6
27812	Le Masurier & Thomson (1990)	-63.73	-63.73	-57.87	-57.87		Larsen Rift	48.28	2.57	15.37	2.39	8.15	0.18	7.26	9.75	3.97	1.42	0.5	1.1	2		101.84	2
27827	Le Masurier & Thomson (1990)	-63.48	-63.48	-55.97	-55.97		Larsen Rift	47.99	2.65	16.58	1.64	8.36	0.18	6.2	9.94	4.09	1.58	0.52	0.07	0.05		99.78	0.05
27831	Le Masurier & Thomson (1990)	-63.6	-63.6	-57	-57	southern Tabarin Peninsula	Larsen Rift	47.64	1.86	15.25	2.05	8.82	0.18	9.66	8.49	3.71	1.26	0.44	0.05	0.65		100.01	0.65
27839	Le Masurier & Thomson (1990)	-63.68	-63.68	-57.7	-57.7		Larsen Rift	47.94	1.71	16.53	4.5	4.9	0.18	6.84	7.93	4.21	1.55	0.47	1.1	2		98.76	2
D.3302.1	Le Masurier & Thomson (1990)	-63.6	-63.6	-57	-57	Seven Buttresses, Tabarin Peninsula	Larsen Rift	48.85	1.84	15.58	1.76	8.83	0.15	8.62	8.15	3.76	1.17	0.47	0.16	0.39	0.65	100.22	1.04
D.4088.5	Le Masurier & Thomson (1990)	-64	-64	-58	-58	Palisade Nunatak	Larsen Rift	57.06	1.19	18.19	2.75	2.5	0.09	1.3	2.91	5.69	4.46	0.28	0.1	3.1	0.12	99.64	3.22
D.4689.1	Le Masurier & Thomson (1990)	-65.05	-65.05	-60.18	-60.18	Seal nunataks, Bull Nunatak	Larsen Rift	49.2	1.98	14.89	11.61		0.15	9.19	8.39	3.65	1.11	0.21				100.38					115				35		276											15				26	16
D.4691.1	Le Masurier & Thomson (1990)	-65	-65.25	-59.5	-60	Seal Nunataks, Bruce Nunatak	Larsen Rift	50.85	2.32	14.93	11.44		0.2	5.9	8.47	3.58	1.19	0.27				99.15					132				40		87											20				25	20
D4088.4	Le Masurier & Thomson (1990)	-64	-64	-58	-58	Palisade Nunatak	Larsen Rift	58.58	0.76	19.23	2.26	2.04	0.06	0.75	2.52	6.36	4.91	0.08	0.13	2.16	0.13	99.84	2.29
G.13.1	Le Masurier & Thomson (1990)	-62.13	-62.13	-58.25	-58.25	Ternyck Needle, Krakow Peninsula	South Shetland Islands	55.4	0.7	18.7	2.15	5.39	0.13	4.9	8.92	3.82	1.44	0.14				101.69					258				27		60						26					12				3
G.31.1	Le Masurier & Thomson (1990)	-62.05	-62.05	-58.4	-58.4	Melville Peak	South Shetland Islands	52	0.91	17.14	1.59	5.68	0.12	7.1	10.75	3	0.91	0.12				99.48	0.16				222				22		115						18					17				2
G.32.1	Le Masurier & Thomson (1990)	-62.05	-62.05	-58.4	-58.4	Melville Peak	South Shetland Islands	52.03	0.88	16.85	1.43	5.71	0.14	7.3	11.22	2.87	0.89	0.13				99.45	0				269				33		172						17					16				3
96020701	Machado et al. (2005)	-62.35	-62.35	-59.6	-59.6	Coppermine Peninsula	South Shetland Islands	48.09	0.97	16.93		9.5	0.14	8.86	10.03	2.66	0.58	0.35				99.74	1.63				327				30.4	41	455		108			1.3	18			2		13.9		0.21		2	18.3
96022001	Machado et al. (2005)	-62.35	-62.35	-59.6	-59.6	Coppermine Peninsula	South Shetland Islands	49.31	0.89	17.5		9.6	0.17	8	10.82	2.51	0.21	0.15				100.24	1.08				122				15	47	329		72				19					3				1	9
96022005	Machado et al. (2005)	-62.35	-62.35	-59.6	-59.6	Coppermine Peninsula	South Shetland Islands	49.4	0.79	18.3		8.9	0.14	7.33	10.54	2.64	0.3	0.13				99.88	1.41				126				11	34	281		80			0.79	18			1		4.9		0.21		2	6.24
96022302	Machado et al. (2005)	-62.35	-62.35	-59.6	-59.6	Coppermine Peninsula	South Shetland Islands	49.25	0.63	18.09		8.18	0.16	8.16	12.85	1.93	0.11	0.12				100.22	0.74				73				20	52	248		83				18					5				1	9
98011501	Machado et al. (2005)	-62.58	-62.83	-60	-60.5	Byers Peninsula	South Shetland Islands	49.5	1.42	15.9		12.8	0.18	4.2	9.3	3.6	0.62	0.21				100.03	2.3				75				15.3	60	27		140	4.6	3	1.43	21	4.3		2	1	6.3		0.44		1	11.7
98012002	Machado et al. (2005)	-62.58	-62.83	-60	-60.5	Byers Peninsula	South Shetland Islands	49.6	1.31	17.3		11.6	0.18	4.1	9.3	3.9	0.33	0.28				99.7	1.8				126				17.3	22	20		33	3.5	2	1.28	17	3.7		2	0.7	7.2		0.29		1	12.3
98012202	Machado et al. (2005)	-62.58	-62.83	-60	-60.5	Byers Peninsula	South Shetland Islands	48.4	0.91	18.29		9.24	0.16	7.59	11.51	2.37	0.42	0.18				100.24	1.17				295				10.7	49	115		57	1.8	1	0.87	15	2.1		1	0.4	4.5		0.13		1	7.6
98012301	Machado et al. (2005)	-62.58	-62.83	-60	-60.5	Byers Peninsula	South Shetland Islands	57.96	1.31	15.07		9.46	0.19	2.36	6.42	3.72	0.66	0.39				99.69	2.15				329				40.8	34	20		10	6.1	3.6	1.83	19	6.6		4.5	1.3	18.5		0.55		3	25.7
98012501	Machado et al. (2005)	-62.58	-62.83	-60	-60.5	Byers Peninsula	South Shetland Islands	53.88	1.02	19.63		8.34	0.13	2.79	8.8	3.97	0.96	0.13				102.01	2.36				176				25	22	10		38	4.72	2.65	1.26		3.98		3	0.96	10		0.4		5	16
990112001	Machado et al. (2005)	-62.17	-62.17	-58.9	-58.9	Fildes Peninsula	South Shetland Islands	46.91	0.62	23.15		7.83	0.16	4.61	10.99	2.66	0.51	0.09				100.07	2.54				263				12	35	13		108				19					4				0.4	9
990112003	Machado et al. (2005)	-62.17	-62.17	-58.9	-58.9	Fildes Peninsula	South Shetland Islands	55.39	0.7	19.19		8.81	0.16	2.9	7.34	4.06	0.92	0.22				100.05	0.36				242				30	31	1		81				21					12				1	17
990112010	Machado et al. (2005)	-62.17	-62.17	-58.9	-58.9	Fildes Peninsula	South Shetland Islands	54.16	0.78	19.08		8.03	0.2	3.7	8.48	3.14	0.91	0.21				99.98	1.29				280				35	31	50		101				22					14				4.5	17
990114003	Machado et al. (2005)	-62.17	-62.17	-58.9	-58.9	Ardley Peninsula	South Shetland Islands	53.71	0.7	18.91		9.58	0.14	3.72	7.78	3.74	0.84	0.23				100.19	0.84				257				24	23	2		74			1.21	22			2		10.3		0.18		2	12
AF-14	Machado et al. (2005)	-62.17	-62.17	-58.9	-58.9	Fildes Peninsula	South Shetland Islands	50.19	0.84	19.89		9.64	0.18	4.31	9.97	3.31	0.57	0.13				100.04	1.01				149				14	31	59		113	2.34	1.27	0.92	24	2.36		1.5	0.45	6.45		0.2		1	9.68
AF-5	Machado et al. (2005)	-62.17	-62.17	-58.9	-58.9	Fildes Peninsula	South Shetland Islands	50.34	0.45	20.56		7.59	0.12	6.15	10.9	2.16	0.79	0.09				100.93	1.78				155				13.88	33	105		64	1.86	0.93	0.63	20	1.57		1	0.3	6.24		0.16		1	8.76
HA-1.1	Machado et al. (2005)	-62.5417	-62.5667	-59.5417	-59.625	Fort Point	South Shetland Islands	47.47	0.83	25.74		8.67	0.12	3.06	9.33	3.23	0.45	0.04				100.95	2.01				184				12.17	23	82		5	2.46	1.26	0.94	23	2.05		1	0.44	5.22		0.2		1	8.72
HA-19.1	Machado et al. (2005)	-62.5417	-62.5667	-59.5417	-59.625	Fort Point	South Shetland Islands	56.22	0.45	17.1		6.7	0.12	4.78	8.54	2.95	1.05	0.2				100.07	1.96				263				24.15		31			2.15	1.39	0.72		2.65		6.5	0.44	12.11		0.22		5	11.34
HA-20	Machado et al. (2005)	-62.5417	-62.5667	-59.5417	-59.625	Fort Point	South Shetland Islands	63.8	0.53	15.58		5.3	0.12	2.19	4.36	3.93	2.05	0.15				99.44	1.43				395				34.86	12	36		42	3.13	1.95	0.98	16	3.66		4	0.64	17.39		0.34		4.1	16.19
HA-8.2A	Machado et al. (2005)	-62.5417	-62.5667	-59.5417	-59.625	Fort Point	South Shetland Islands	58.69	0.69	17.62		6.74	0.11	2.85	6.97	3.75	1.63	0.19				99.87	0.63				340				40.42	15	30		100	4.51	2.83	1.13	18	4.97		6.5	0.9	18.81		0.45		4.6	20.94
HY-4	Machado et al. (2005)	-62.5	-62.5	-59.8	-59.8	Fort Point	South Shetland Islands	60.7	0.82	15.9		7.3	0.12	2.6	5.7	3.6	2.7	0.19				100.33	0.7				486				46.05	19	69		171	5.61	2.73	1.21	23	4.81		5	1.08	22.7		0.53		7.5	25.01
PA-8.1A	Machado et al. (2005)	-62.5	-62.5	-59.8	-59.8	Fort Point	South Shetland Islands	50	0.72	16.8		9.2	0.16	7.4	10.4	2.8	0.5	0.15				99.53	1.4				202				17.91	32	208		49	2.66	1.46	0.93	13	2.32		1.5	0.55	8.13		0.23		2	12
AR-1	Machado et al. (2005b)	-62.17	-62.17	-58.9	-58.9	Ardley Peninsula	South Shetland Islands	53.78	0.98	17.14		9.78	0.15	4.89	7.53	3.03	0.77	0.22				100.02	1.75				292				29	28	65	3	152			1.25	20			3		13.1		0.29		3.8	18
AR-5	Machado et al. (2005b)	-62.17	-62.17	-58.9	-58.9	Ardley Peninsula	South Shetland Islands	51.73	0.8	18.15		9.06	0.16	5.35	9.92	2.91	0.52	0.16				100.05	1.29				233				24	46	66		129			1.04	19					8				3.9	13
AR-6	Machado et al. (2005b)	-62.17	-62.17	-58.9	-58.9	Ardley Peninsula	South Shetland Islands	55.72	0.91	17.05		8.34	0.14	4.14	7.55	3.13	0.92	0.21				99.64	1.53				272				36	35	49		173				19					11				3.8	17
GR-1	Machado et al. (2005b)	-62.05	-62.05	-58.4	-58.4	Fort Point	South Shetland Islands	55.99	0.61	17.4		7.46	0.14	3.89	7.26	3.67	1.05	0.13				99.09	1.49				263				24.71		43			2.71	1.61	0.88		2.86		3	0.52	12.25		0.28		3	12.57
GR-2	Machado et al. (2005b)	-62.05	-62.05	-58.4	-58.4	Fort Point	South Shetland Islands	53.95	0.78	18.87		8.49	0.16	4.57	9.2	2.95	0.2	0.11				99.87	0.59				112				11.65		37			3.13	1.93	0.89		2.73		2	0.61	5		0.31		1.1	8.17
GR-3	Machado et al. (2005b)	-62.05	-62.05	-58.4	-58.4	Fort Point	South Shetland Islands	47.47	0.83	25.74		8.67	0.12	3.06	9.33	3.23	0.45	0.04				100.95	2.01				184				12.17	23	82	1	0	2.46	1.26	0.94	23	2.05		1	0.44	5.22		0.2		1.24	8.72
KG-1	Machado et al. (2005b)	-62.17	-62.17	-58.9	-58.9	Fildes Peninsula	South Shetland Islands	50.19	0.84	19.89		9.64	0.18	4.31	9.97	3.31	0.57	0.13				100.04	1.01				149				14	31	59	0.2	113	2.34	1.27	0.92	24	2.36		1.5	0.45	6.45		0.2		0.9	9.68
KG-10	Machado et al. (2005b)	-62.17	-62.17	-58.9	-58.9	Fildes Peninsula	South Shetland Islands	46.91	0.62	23.15		7.83	0.16	4.61	11	2.66	0.51	0.09				100.08	2.54				263				12	35	13		108				19					4				0	9
KG-11	Machado et al. (2005b)	-62.17	-62.17	-58.9	-58.9	Fildes Peninsula	South Shetland Islands	50.34	0.45	20.56		7.59	0.12	6.15	10.9	2.16	0.79	0.09				100.93	1.78				155				13.88	33	105	0.3	64	1.86	0.93	0.63	20	1.57		1	0.3	6.24		0.16		0.93	8.76
KG-12	Machado et al. (2005b)	-62.17	-62.17	-58.9	-58.9	Fildes Peninsula	South Shetland Islands	49.8	0.75	18.68		9.04	0.17	5.85	11.7	2.46	0.58	0.22				100.13	0.88				284				42	42	50		118				18					16				1.8	24
KG-13	Machado et al. (2005b)	-62.17	-62.17	-58.9	-58.9	Fildes Peninsula	South Shetland Islands	52.64	0.71	20.64		7.96	0.14	4.25	10.39	1.84	0.4	0.12				99.2	0.11				151				16.6	27.5						1.02				2		7.2		0.19		0.6	13
KG-14	Machado et al. (2005b)	-62.17	-62.17	-58.9	-58.9	Fildes Peninsula	South Shetland Islands	52.14	0.85	17.96		10.05	0.18	3.73	7.79	3.58	0.67	0.15				99.13	2.03				174				16.38	27	68	0.2	159	3.09	1.64	1	24	2.64		2	0.59	7.69		0.27		1.54	11.67
KG-15	Machado et al. (2005b)	-62.17	-62.17	-58.9	-58.9	Fildes Peninsula	South Shetland Islands	50.5	0.84	19.7		10.28	0.17	4.33	9.78	3.14	0.48	0.13				100.02	0.67				218				15.12	28.5	43	0.1	150	2.5	1.24	0.99	25	2.24		1	0.49	7.03		0.21		1.57	10.07
KG-2	Machado et al. (2005b)	-62.17	-62.17	-58.9	-58.9	Fildes Peninsula	South Shetland Islands	53.22	0.88	17.18		8.22	0.14	4.68	8.35	3.18	1.03	0.14				99.64	2.62				204				21.98	28	123	0.5	64	2.8	1.5	1	23	2.94		2.5	0.55	10.24		0.27		4	13.98
KG-3	Machado et al. (2005b)	-62.17	-62.17	-58.9	-58.9	Fildes Peninsula	South Shetland Islands	57.16	0.96	17.34		8.03	0.29	3.13	7.15	4.3	0.81	0.27				99.91	0.47				349				37	40	15		94				19					15				5.4	21
KG-4	Machado et al. (2005b)	-62.17	-62.17	-58.9	-58.9	Fildes Peninsula	South Shetland Islands	60.92	0.97	16.81		6.58	0.16	2.85	5.25	3.46	1.02	0.31				99.14	0.81				464				32.82	14.5						1.6				3		16.04		0.37		6	21
KG-5	Machado et al. (2005b)	-62.17	-62.17	-58.9	-58.9	Fildes Peninsula	South Shetland Islands	52.03	1.06	18.73		9.2	0.2	3.91	8.1	3.58	1.34	0.26				99.67	1.26				354				41	29	39		143				22.5					17				5.7	24
KG-6	Machado et al. (2005b)	-62.17	-62.17	-58.9	-58.9	Fildes Peninsula	South Shetland Islands	50.98	0.78	19.05		9.06	0.15	5.08	10.73	2.9	0.3	0.16				99.99	0.8				171				25	43	34		137				19					8				1.1	12
KG-7	Machado et al. (2005b)	-62.17	-62.17	-58.9	-58.9	Fildes Peninsula	South Shetland Islands	52.3	0.84	18.85		9.03	0.11	4.75	7.76	3.89	0.92	0.19				99.59	0.95				295				28	34	73		137				22					12				3.5	21
KG-8	Machado et al. (2005b)	-62.17	-62.17	-58.9	-58.9	Fildes Peninsula	South Shetland Islands	55.39	0.7	19.19		8.81	0.16	2.9	7.34	4.06	0.92	0.22				100.05	0.36				242				30	31			81				21					12				1.1	17
KG-9A	Machado et al. (2005b)	-62.17	-62.17	-58.9	-58.9	Fildes Peninsula	South Shetland Islands	54.89	0.78	18.57		7.99	0.15	3.72	8.49	3.51	0.8	0.2				100.2	1.1				292				29	44	50		104				19					10				3.4	18
KG-9B	Machado et al. (2005b)	-62.17	-62.17	-58.9	-58.9	Fildes Peninsula	South Shetland Islands	54.16	0.78	19.08		8.03	0.2	3.7	8.48	3.14	0.91	0.21				99.98	1.29				280				35	31	50		101				21.5					14				4.5	17
LI-1	Machado et al. (2005b)	-62.58	-62.83	-60	-60.5	Byers Peninsula	South Shetland Islands	55.46	1.35	15.27		11.02	0.19	3.59	7.24	3.99	1.05	0.27				100.65	1.22				180				22	20	10		78	5.19	2.98	1.36		4.23		3	1.09	8		0.46		8	18
LI-10	Machado et al. (2005b)	-62.58	-62.83	-60	-60.5	Byers Peninsula	South Shetland Islands	60.9	0.8	16.77		6.49	0.19	2.46	5.45	4.31	1.04	0.27				99.56	0.88				227				29.4	29	20	0.5	10	4.2	2.8	1.49	16	4.6		3.5	0.9	13.1		0.45		2	17.7
LI-12A	Machado et al. (2005b)	-62.58	-62.83	-60	-60.5	Byers Peninsula	South Shetland Islands	54	1.57	16		10.1	0.21	2.6	7	4.4	0.68	0.6				99.76	2.6				308				41.7	40	20	7	10	6.9	4.2	2.21	20	7.5		4	1.4	17.8		0.6		3	27.4
LI-12B	Machado et al. (2005b)	-62.58	-62.83	-60	-60.5	Byers Peninsula	South Shetland Islands	50.54	1.1	17.03		9.57	0.18	8.01	9.65	2.88	0.19	0.23				100.25	0.87				87				23	62	366		35				16					8				2.6	16
LI-13	Machado et al. (2005b)	-62.58	-62.83	-60	-60.5	Byers Peninsula	South Shetland Islands	49.6	1.31	17.3		11.6	0.18	4.1	9.3	3.9	0.33	0.28				99.7	1.8				126				17.3	22	20	1	33	3.5	2	1.28	17	3.7		2	0.7	7.2		0.29		0	12.3
LI-14	Machado et al. (2005b)	-62.58	-62.83	-60	-60.5	Byers Peninsula	South Shetland Islands	56.73	0.74	17.42		7.55	0.2	3.08	6.27	4.15	1.03	0.24				99.36	1.95				145				25.5	16	20	0.5	12	3.5	2.2	1.32	14	3.9		2.5	0.7	11.2		0.35		1	15.9
LI-15	Machado et al. (2005b)	-62.58	-62.83	-60	-60.5	Byers Peninsula	South Shetland Islands	57.96	1.31	15.07		9.46	0.19	2.36	6.42	3.72	0.66	0.39				99.69	2.15				329				40.8	34	20	4.5	10	6.1	3.6	1.83	19	6.6		4.5	1.3	18.5		0.55		3	25.7
LI-2	Machado et al. (2005b)	-62.58	-62.83	-60	-60.5	Byers Peninsula	South Shetland Islands	48.4	0.91	18.29		9.24	0.16	7.59	11.51	2.37	0.42	0.18				100.24	1.17				295				10.7	49	115	0.5	57	1.8	1	0.87	15	2.1		1	0.4	4.5		0.13		0	7.6
LI-3	Machado et al. (2005b)	-62.58	-62.83	-60	-60.5	Byers Peninsula	South Shetland Islands	50.7	1.18	15.9		11.4	0.16	5.2	9.4	3.7	0.81	0.19				99.64	1				109				16.7	43	57	0.5	50	3.6	2.3	1.17	17	3.5		2	0.7	7.2		0.34		2	11.2
LI-4	Machado et al. (2005b)	-62.58	-62.83	-60	-60.5	Byers Peninsula	South Shetland Islands	50.4	0.97	16		10.3	0.14	6.2	11.2	3.1	0.26	0.16				100.13	1.4				77				12.8	52	123	0.5	79	3	1.8	0.98	16	2.8		2	0.6	5.4		0.26		1	8.9
LI-5	Machado et al. (2005b)	-62.58	-62.83	-60	-60.5	Byers Peninsula	South Shetland Islands	53.07	0.7	16.93		9.23	0.17	6.45	10.3	2.66	0.5	0.08				100.31	0.22				91				9.9	42	158	0.5	48	2.5	1.7	0.71	14	2.2		2	0.5	4.3		0.25		1	6.9
LI-6	Machado et al. (2005b)	-62.58	-62.83	-60	-60.5	Byers Peninsula	South Shetland Islands	49.5	1.42	15.9		12.8	0.18	4.2	9.3	3.6	0.62	0.21				100.03	2.3				75				15.3	60	27	0.5	140	4.6	3	1.43	21	4.3		2	1	6.3		0.44		0	11.7
LI-6	Machado et al. (2005b)	-62.58	-62.83	-60	-60.5	Byers Peninsula	South Shetland Islands	53.88	1.02	19.63		8.34	0.13	2.79	8.8	3.97	0.96	0.13				102.01	2.36				176				25	22	10		38	4.72	2.65	1.26		3.98		3	0.96	10		0.4		5	16
LI-7	Machado et al. (2005b)	-62.58	-62.83	-60	-60.5	Byers Peninsula	South Shetland Islands	53.6	1.63	15.9		11.3	0.17	3.09	7.5	4.1	1.35	0.44				100.88	1.8				245				40.2	23	20	0.5	45	5.8	3.7	1.85	18	6.1		4	1.2	17.6		0.52		3	25.3
LI-8	Machado et al. (2005b)	-62.58	-62.83	-60	-60.5	Byers Peninsula	South Shetland Islands	48.41	1.11	20.51		9.55	0.14	4.73	12.29	2.47	0.28	0.17				101.2	1.54				71				11	29	26		48	2.35	1.18	0.79		2.23		1	0.48	4		0.19		6	9
LI-9	Machado et al. (2005b)	-62.58	-62.83	-60	-60.5	Byers Peninsula	South Shetland Islands	60.98	0.8	16.69		6.43	0.19	2.42	5.44	4.24	1.03	0.26				99.49	1.01				204				26.8	24	227	0.5	10	4	2.4	1.33	13	4		3	0.8	12		0.4		3	16.2
RO-1	Machado et al. (2005b)	-62.35	-62.35	-59.6	-59.6	Coppermine Peninsula	South Shetland Islands	49.13	0.95	17.64		9.38	0.16	7.76	9.65	3.17	0.68	0.26				99.93	1.15				302				25.8	38	339		73			1.22	19			2.5		11.9		0.21		1.7	15
RO-2	Machado et al. (2005b)	-62.35	-62.35	-59.6	-59.6	Coppermine Peninsula	South Shetland Islands	48.09	0.97	16.93		9.5	0.14	8.86	10.03	2.66	0.58	0.35				99.74	1.63				327				30.4	41	455		108			1.3	18			2		13.9		0.21		2	18.3
RO-3	Machado et al. (2005b)	-62.35	-62.35	-59.6	-59.6	Coppermine Peninsula	South Shetland Islands	49.21	0.91	18.2		9.56	0.16	7.47	10.31	2.58	0.28	0.14				100.11	1.29				132				11.9	37	328		80			0.83	18			1		5.1		0.2		1.1	8.28
RO-4	Machado et al. (2005b)	-62.35	-62.35	-59.6	-59.6	Coppermine Peninsula	South Shetland Islands	49.4	0.79	18.3		8.9	0.14	7.33	10.54	2.64	0.3	0.13				99.88	1.41				126				11	34	281		80			0.79	17.5			1		4.9		0.21		1.6	6.24
RO-5	Machado et al. (2005b)	-62.35	-62.35	-59.6	-59.6	Coppermine Peninsula	South Shetland Islands	49.31	0.89	17.5		9.6	0.17	8	10.82	2.51	0.21	0.15				100.24	1.08				122				15	47	329		72				18.5					3				0.7	9
1	Smellie (1983)	-62.58	-62.83	-60	-60.5	Byers Peninsula	South Shetland Islands	48.3	1.07	15.5	2.36	7.85	0.2	9.6	10.5	2.5	0.24	0.22				98.34					71				16		256											4				3
2	Smellie (1983)	-62.58	-62.83	-60	-60.5	Byers Peninsula	South Shetland Islands	78	0.11	12.4	0.06	0.14	0.01	0.2	0.3	2.26	5.48	0.01				98.97					665				35													19				9
3	Smellie (1983)	-62.35	-62.35	-59.6	-59.6	Coppermine Peninsula	South Shetland Islands	49.8	0.67	17.1	2.46	6.14		9.8	11.39	2.24	0.34	0.12				100.06					157				16		360						20
4	Smellie (1983)	-62.05	-62.05	-58.4	-58.4	Fildes Peninsula	South Shetland Islands	50.7	0.87	19.9	2.74	6.85	0.17	3.9	11.57	3.38	0.32	0.12				100.52					149				17								24
5	Smellie (1983)	-62.05	-62.05	-58.4	-58.4	Potter Peninsula, Fildes Formation	South Shetland Islands	53.1	0.97	17.2	2.46	6.15	0.16	5.7	8	3.36	1	0.22				98.32					333				20		20						21					16
6	Smellie (1983)	-62.05	-62.05	-58.4	-58.4	Point Hennequin, Vieville Glacier Formation	South Shetland Islands	67.5	0.64	16.2	0.74	1.86	0.17	0.7	2.11	5.12	3.81	0.14				98.99					860				75		3						19					48				9
7	Smellie (1983)	-62.05	-62.05	-58.4	-58.4	Cinder spur	South Shetland Islands	53.7	0.86	24	0.82	2.74	0.13	1.8	10.35	4.16	0.66	0.2				99.42					246				21		19						24					10				1
8	Smellie (1983)	-62.58	-62.83	-60	-60.5	Half Moon Island	South Shetland Islands	48.2	0.39	18.7	2.08	5.19	0.13	8.7	13.9	8.7	0.2	0.04				106.23					62						150						21
9	Smellie (1983)	-62.05	-62.05	-58.4	-58.4	Wegger Peak	South Shetland Islands	54.1	0.75	17.3	2.32	5.8	0.14	6.4	8.39	3.3	1.41	0.17				100.08					262				33		20						24					19
10	Smellie (1983)	-62.05	-62.05	-58.4	-58.4	Noel Hill	South Shetland Islands	58.2	0.77	16.9	2.24	5.61	0.21	4.1	7.72	3.33	2.18	0.21				101.47					407				52								25					29				3
11	Smellie (1983)	-63.2	-63.2	-62	-62	Cape Wallace	South Shetland Islands	64	0.54	15.2	1.62	4.05	0.12	1.9	4.44	4.12	1.82	0.12				97.93					319				37								19					19				5
12	Smellie (1983)	-63.2	-63.2	-62	-62	north of Cape Hooker	South Shetland Islands	71.4	0.39	14.4	0.86	2.15	0.09	1.1	2.4	4.6	2.52	0.05				99.96					318				34								15					18
D.3759.1	Smellie (1987)	-64.2	-64.2	-57.75	-57.75	James Ross Island	Larsen Rift	48.1	1.72	15.95	0.38	10	0.15	8.88	8.26	3.37	1.08	0.5				99.2	0.81				146				47		260											17				25
D.4053.9	Smellie (1987)	-64.2	-64.2	-57.75	-57.75	James Ross Island	Larsen Rift	48.2	2.38	17.62	1.71	8.04	0.16	4.9	8.58	4.37	1.85	0.7				98.88	0.37				208				59		34											30				44
D.4085.7	Smellie (1987)	-64.2	-65.05	-57.75	-57.75	James Ross Island	Larsen Rift	51	3.37	14.51	7.88	3.92	0.17	3.09	6.74	4.85	2.65	0.92				99.42	0.32				284				92		20											45				58
15452	Smellie et al. (1984)	-62.58	-62.83	-60	-60.5	Chester Cone, Byers Peninsula	South Shetland Islands	57	0.78	16.2	1.96	4.89	0.21	5.4	6.03	4	1.16	0.24				97.87					206				23		12											10				6
15454	Smellie et al. (1984)	-62.58	-62.83	-60	-60.5	Byers Peninsula	South Shetland Islands	78	0.11	12.4	0.06	0.14	0.01	0.2	0.27	2.26	5.48	0.01				98.94					665				35													19				9
15455	Smellie et al. (1984)	-62.58	-62.83	-60	-60.5	Byers Peninsula	South Shetland Islands	76.8	0.12	12.9	0.28	0.71	0.02	0.3	0.56	3.62	3.83	0.01				99.15					586				32													40				8
15461	Smellie et al. (1984)	-62.58	-62.83	-60	-60.5	Byers Peninsula	South Shetland Islands	51.4	1.38	16.1	2.68	8.94	0.23	4.9	9.81	3.28	0.24	0.23				99.19					150				26		27											6				3
16131	Smellie et al. (1984)	-62.05	-62.05	-58.4	-58.4	Martins Head	South Shetland Islands	57.2	0.59	18.2	1.71	4.28	0.17	4.2	7.06	4.36	0.94	0.26				98.97					408				31		20						25					13				1
16135	Smellie et al. (1984)	-62.05	-62.05	-58.4	-58.4	Martins Head	South Shetland Islands	52.7	0.73	18.2	1.96	6.54	0.18	4	9.24	3.69	0.82	0.23				98.29					259				26		46						26					11				4
16136	Smellie et al. (1984)	-62.05	-62.05	-58.4	-58.4	Martins Head	South Shetland Islands	49.8	0.81	18.1	1.93	6.44	0.21	5.9	10.27	3.33	0.58	0.14				97.51					177				21		57						25					7				1
16137	Smellie et al. (1984)	-62.05	-62.05	-58.4	-58.4	Martins Head	South Shetland Islands	51.5	0.75	17.7	2	6.65	0.19	5.2	9.53	3.71	0.8	0.22				98.25					234				25		43						24					12				3
16138	Smellie et al. (1984)	-62.05	-62.05	-58.4	-58.4	Martins Head	South Shetland Islands	50.2	0.75	16.5	2	6.66	0.37	5.3	11.36	3.37	0.64	0.24				97.39					215				25		212						23					13				3
16144	Smellie et al. (1984)	-62.05	-62.05	-58.4	-60	Cinder Spur	South Shetland Islands	54.1	0.85	18	1.58	5.27	0.16	5.4	7.84	3.7	1.02	0.14				98.06					325				19		28						26					8
16145	Smellie et al. (1984)	-62.05	-62.5	-58.4	-58.4	Cinder Spur	South Shetland Islands	52.6	0.82	17.7	1.52	5.06	0.14	5.7	9.66	3.42	0.95	0.14				97.71					214				20		43						25					9				1
16147	Smellie et al. (1984)	-62.05	-62.05	-58.4	-58.4	Cinder Spur	South Shetland Islands	51.4	0.87	19.8	1.71	5.69	0.14	4.1	9.9	3.74	0.81	0.2				98.36					223				26		23						28					11
16148	Smellie et al. (1984)	-62.05	-62.5	-58.4	-60	Cinder Spur	South Shetland Islands	53.7	0.86	24	0.82	2.74	0.13	1.8	10.35	4.16	0.66	0.2				99.42					246				21		19						24					10				1
16153	Smellie et al. (1984)	-62.05	-62.05	-58.4	-58.4	Cinder Spur	South Shetland Islands	50.8	0.78	22	1.48	4.94	0.31	4.4	7.96	4.91	0.88	0.24				98.7					421				22		27						28					9				1
16572	Smellie et al. (1984)	-62.58	-62.83	-60	-60.5	Chester Cone, Byers Peninsula	South Shetland Islands	62.1	0.55	16.3	1.58	3.94	0.26	3.6	6.45	3.38	0.89	0.22				99.27					218				35		11						15					13				4
G.13.1	Smellie et al. (1984)	-62.05	-62.05	-58.4	-58.4	Ternyck Needle	South Shetland Islands	55.4	0.7	18.7	2.15	5.39	0.13	4.9	8.92	3.82	1.44	0.14				101.69					258				27		60						26					12				3
G.14.2	Smellie et al. (1984)	-62.05	-62.05	-58.4	-58.4	Precious Peaks, Hennequin Formation	South Shetland Islands	55.1	0.83	15.9	2.24	5.6	0.13	6.2	7.09	3.1	2.28	0.2				98.67					407				47		40						24					21				5
G.23.6	Smellie et al. (1984)	-62.05	-62.05	-58.4	-58.4	Wegger Peak	South Shetland Islands	53.5	0.74	16.5	2.42	6.05	0.16	6.9	7.93	3.37	1.42	0.2				99.19					265				32		20						25					11
G.25.4	Smellie et al. (1984)	-62.05	-62.05	-58.4	-58.4	Rose Peak	South Shetland Islands	58.6	0.66	17.4	1.85	4.64	0.1	5	6.42	4.53	1.99	0.19				101.38					356				40		40						25					16				4
G.26.1	Smellie et al. (1984)	-62.05	-62.05	-58.4	-58.4	False Round Point, Hennequin Formation	South Shetland Islands	56	0.74	16.1	1.98	4.95	0.1	4.9	8.1	2.81	1.19	0.17				97.04																	24
G.28.1	Smellie et al. (1984)	-62.05	-62.05	-58.4	-58.4	Esther Nunatak, Hennequin Formation	South Shetland Islands	57.2	0.73	16.2	1.97	4.92	0.21	6.5	7.04	3.71	1.75	0.15				100.38																	22
G.29.1	Smellie et al. (1984)	-62.05	-62.05	-58.4	-58.4	Brimstone Peak, Hennequin Formation	South Shetland Islands	57.2	0.68	17.1	1.85	4.63	0.09	5.4	7.59	4.23	1.56	0.21				100.54																	25
G.30.3	Smellie et al. (1984)	-62.05	-62.05	-58.4	-58.4	North Foreland, Hennequin Formation	South Shetland Islands	54.8	0.66	17.1	2.04	5.1	0.16	8.1	3.91	3.79	0.21	0.19				96.06																	26
G.30.7	Smellie et al. (1984)	-62.05	-62.05	-58.4	-58.4	North Foreland, Hennequin Formation	South Shetland Islands	58.6	0.64	17.7	1.75	4.37	0.11	4.8	6.39	4.53	1.69	0.2				100.78																	24
G.490.1	Smellie et al. (1984)	-62.05	-62.05	-58.4	-58.4	Rose Peak	South Shetland Islands	57.3	0.79	16.6	2.08	5.2	0.14	6.1	6.89	3.92	1.75	0.25				101.02					425												22
P.1114.1	Smellie et al. (1984)	-62.05	-62.05	-58.4	-58.4	Suffield Point, Fildes Peninsula, Fildes Formation	South Shetland Islands	55.9	0.81	18.9	2.28	5.71	0.15	3.9	8	3.74	0.87	0.16				100.42					319				32		30						22					16
P.1125.1	Smellie et al. (1984)	-62.05	-62.05	-58.4	-58.4	Northern Fildes Peninsula, Fildes Formation	South Shetland Islands	55.2	1.35	16.2	2.87	7.18	0.21	3.4	7.47	4.48	0.79	0.25				99.4					293				41								23					15
P.1129.1	Smellie et al. (1984)	-62.05	-62.5	-58.4	-59	northern Fildes Peninsula, Fildes Formation	South Shetland Islands	50.2	0.53	19.2	2.26	8.66	0.13	6.7	12.06	2.58	0.56	0.08				102.96					129				16		90						22					11
P.1136.1	Smellie et al. (1984)	-62.05	-62.05	-58.4	-58.4	Jasper Point, Fildes Peninsula, Fildes Formation	South Shetland Islands	62.2	0.86	16.3	1.68	4.2	0.17	1.1	5.14	4.95	1.36	0.29				98.25					450				53								21					25				8
P.1147.3	Smellie et al. (1984)	-62.05	-62.05	-58.4	-58.4	Northern Fildes Peninsula, Fildes Formation	South Shetland Islands	49.6	0.5	19.6	2.33	5.84	0.14	7.4	12.22	2.04	0.38	0.08				100.13					122				20		40						19
P.1149.1	Smellie et al. (1984)	-62.05	-62.05	-58.4	-58.4	Northern Fildes Peninsula, Fildes Formation	South Shetland Islands	57.9	0.92	15.9	2.26	5.64	0.19	3.2	7.32	4.21	0.5	0.14				98.18					268				28								25
P.1162.5	Smellie et al. (1984)	-62.05	-62.05	-58.4	-58.4	Northern Fildes Peninsula, Fildes Formation	South Shetland Islands	50.7	0.87	19.9	2.74	6.85	0.17	3.9	11.57	3.38	0.32	0.12				100.52					149				17								24
P.1166.7	Smellie et al. (1984)	-62.05	-62.05	-58.4	-58.4	Northern Fildes Peninsula, Fildes Formation	South Shetland Islands	53.1	1.06	17.6	2.82	7.06	0.18	4.8	9.69	3.81	0.57	0.14				100.83					192				21		30						23
P.1177.1	Smellie et al. (1984)	-62.05	-62.5	-58.4	-59	Gemel Peaks, Fildes Peninsula, Fildes Formation	South Shetland Islands	51.8	0.78	18.3	2.66	6.66	0.18	5	9.46	3.14	0.93	0.13				99.04					162				17								22					8
P.1177.2	Smellie et al. (1984)	-62.05	-62.5	-58.4	-59	Gemel Peaks, Fildes Peninsula, Fildes Formation	South Shetland Islands	52.9	0.67	21.2	2.38	5.94	0.13	5.2	10.7	3.3	0.82	0.1				103.34					147				15		20						22					7
P.1181.3	Smellie et al. (1984)	-62.05	-62.5	-58.4	-58.4	Jasper Point, Fildes Peninsula, Fildes Formation	South Shetland Islands	62	0.85	16.2	1.61	4.02	0.15	1.2	5.54	3.92	1.38	0.28				97.15					540				47								22					24
P.1182.1	Smellie et al. (1984)	-62.05	-62.05	-58.4	-58.4	Northern Fildes Peninsula, Fildes Formation	South Shetland Islands	63.7	0.92	15.4	1.56	3.9	0.2	1.4	3.61	5.37	2.04	0.24				98.34					492				58								23					27				4
P.1183.2	Smellie et al. (1984)	-62.05	-62.05	-58.4	-58.4	Northern Fildes Peninsula, Fildes Formation	South Shetland Islands	64.5	0.92	15.5	1.45	3.63	0.2	1.2	3.46	5.48	2.13	0.24				98.71					518				57								22					26
P.1187.4	Smellie et al. (1984)	-62.05	-62.05	-58.4	-58.4	Ezcurra Inlet, Fildes Formation	South Shetland Islands	56.9	0.78	17.7	2.22	5.54	0.16	5	7.5	3.36	1.64	0.18				100.98					274				48		20						24					25
P.1188.1	Smellie et al. (1984)	-62.05	-62.05	-58.4	-58.4	Precious Peaks, Hennequin Formation	South Shetland Islands	53.6	0.83	15.7	2.38	5.96	0.14	6.5	6.78	3.02	2.24	0.29				97.44					496				51		30						25					19
P.1189.1	Smellie et al. (1984)	-62.05	-62.05	-58.4	-58.4	Stenhouse Bluff	South Shetland Islands	54.7	0.79	15.7	2.15	5.39	0.13	5.3	8.43	2.71	2.15	0.23				97.68					374				44		30						23					20
P.1192.1	Smellie et al. (1984)	-62.05	-62.05	-58.4	-58.4	Wegger Peak	South Shetland Islands	54.9	0.8	16.8	2.29	5.72	0.14	5.8	7.29	3.46	1.74	0.24				99.18					323				43		10						23					20				5
P.1192.1	Smellie et al. (1984)	-62.05	-62.05	-58.4	-58.4	Crepin Point, Hennequin Formation	South Shetland Islands	52.6	0.79	16.9	2.49	6.22	0.18	6.9	9.27	2.55	0.5	0.19				98.59					273				35		30						25					12
P.1192.5	Smellie et al. (1984)	-62.05	-62.05	-58.4	-58.4	Wegger Peak	South Shetland Islands	54.1	0.75	17.3	2.32	5.8	0.14	6.4	8.39	3.3	1.41	0.17				100.08					262				33		20						24					19
P.1195.2	Smellie et al. (1984)	-62.5	-62.05	-59	-58.4	Duthoit Point, Fildes Formation	South Shetland Islands	54.1	1.71	15.5	2.99	7.47	0.18	5.2	8.23	3.58	0.88	0.24				100.08					268				27		20						20					17				6
P.1195.9	Smellie et al. (1984)	-62.5	-62.05	-59	-58.4	Duthoit Point, Fildes Formation	South Shetland Islands	50	1.09	15.3	2.71	6.77	0.18	8.7	8.54	3.03	0.35	0.17				96.84					204				20		150						19					17				5
P.1198.1	Smellie et al. (1984)	-62.5	-62.05	-59	-59	Stansbury Peninsula, Fildes Formation	South Shetland Islands	66.1	0.78	14.9	1.23	3.08	0.14	1	3.52	4.8	1.85	0.13				97.53					602				57								22					25				7
P.1198.5	Smellie et al. (1984)	-62.5	-62.05	-59	-58.4	Stansbury Peninsula, Fildes Formation	South Shetland Islands	51.7	0.8	16.2	2.39	5.98	0.15	8.3	9.79	3.04	0.51	0.14				99					154				19		30						25					7
P.1203.1	Smellie et al. (1984)	-62.5	-62.05	-59	-58.4	Stansbury Peninsula, Fildes Formation	South Shetland Islands	50.3	0.84	18.9	2.51	6.29	0.15	5.4	11.44	2.81	0.5	0.14				99.28					142				17		10						22					6				6
P.1205.1	Smellie et al. (1984)	-62.5	-62.5	-59	-59	Stansbury Peninsula, Fildes Formation	South Shetland Islands	49.3	0.47	20.1	2.29	5.72	0.11	6	13.22	2.29	0.61	0.08				100.19					109				15		20						20					11				4
P.1214.1	Smellie et al. (1984)	-62.5	-62.5	-59	-59	Harmony Point	South Shetland Islands	51.2	0.6	18.6	2.4	6.01	0.15	9.2	10.06	1.88	0.58	0.09				100.77					116				15		80						21
P.1215.1	Smellie et al. (1984)	-62.5	-62.5	-59	-59	Harmony Point	South Shetland Islands	67	0.73	14.5	1.29	3.24	0.17	1.4	3.56	3.19	1.88	0.18				97.14					344				27								18					9				5
P.1216.2	Smellie et al. (1984)	-62.5	-62.5	-59	-59	Harmony Point	South Shetland Islands	51.4	0.65	18.7	2.22	5.55	0.15	5.4	10.13	2.75	0.2	0.1				97.25					103				10								20
P.1219.1	Smellie et al. (1984)	-62.5	-62.5	-59	-59	Harmony Point	South Shetland Islands	49.7	0.66	17.4	2.38	5.96	0.14	8.2	12.03	2.15	0.4	0.11				99.13					161				16		120						21
P.1224.1	Smellie et al. (1984)	-62.5	-62.05	-59	-58.4	Rip Peninsula, Stansbury Peninsula, Fildes Formation	South Shetland Islands	51.1	0.53	19.2	2.22	5.56	0.14	6.4	11.2	2.97	0.87	0.08				100.27					151				15		50						21					11				5
P.1236.1	Smellie et al. (1984)	-62.05	-62.05	-58.4	-58.4	Three Brothers hill, Potter Peninsula, Fildes Formation	South Shetland Islands	55.7	1.31	18.1	2.63	6.57	0.17	3.8	7.99	3.85	1.36	0.29				101.77					328				46								21					27				4
P.1240.1	Smellie et al. (1984)	-62.05	-62.05	-58.4	-58.4	Three Brothers hill, Potter Peninsula, Fildes Formation	South Shetland Islands	54.3	1.02	21.2	2.28	5.7	0.17	3.4	9.35	4.13	0.82	0.22				102.59					240				23								24					15				5
P.1241.1	Smellie et al. (1984)	-62.05	-62.05	-58.4	-58.4	Three Brothers hill, Potter Peninsula, Fildes Formation	South Shetland Islands	50.5	0.83	18.2	2.67	6.66	0.14	6.7	11.78	2.5	0.26	0.13				100.37					138				19		160						22					17
P.1246.1	Smellie et al. (1984)	-62.05	-62.05	-58.4	-58.4	Anvil Crag, Fildes Formation	South Shetland Islands	52.6	0.84	20.6	2.46	6.14	0.15	4.6	9.67	3.4	0.91	0.22				101.59					238				33		20						25					15
P.1250.2	Smellie et al. (1984)	-62.58	-62.83	-60	-60.5	Half Moon Island	South Shetland Islands	55	1.1	16.3	2.62	6.56	0.19	5.5	8.09	3.56	0.92	0.28				100.12					266				31								23					15
P.1251.1	Smellie et al. (1984)	-62.58	-62.83	-60	-60.5	Half Moon Island	South Shetland Islands	56	1.26	15.2	2.74	6.84	0.2	4.8	7.6	3.57	1.12	0.26				99.59					311				31								23					17				3
P.1251.10	Smellie et al. (1984)	-62.58	-62.83	-60	-60.5	Half Moon Island	South Shetland Islands	58.2	1.12	17.2	2.37	5.92	0.17	4.3	7.03	4.41	0.88	0.22				101.82					347				24								24					9				4
P.1251.7	Smellie et al. (1984)	-62.58	-62.83	-60	-60.5	Half Moon Island	South Shetland Islands	57.2	1.2	15.2	2.55	6.37	0.19	4.3	6.4	4.18	1.27	0.3				99.16					376				34								21					24				5
P.1251.8	Smellie et al. (1984)	-62.58	-62.35	-60	-59.6	Half Moon Island	South Shetland Islands	69.2	0.43	15.3	1.16	2.9	0.12	0.4	2.07	6.21	2.41	0.13				100.33					544				44								24					25				8
P.1252.4	Smellie et al. (1984)	-62.58	-62.83	-60	-60.5	Half Moon Island	South Shetland Islands	48.2	0.39	18.7	2.08	5.19	0.13	8.7	13.9	2.19	0.2	0.04				99.72					62						150						21
P.1253.18	Smellie et al. (1984)	-62.58	-62.35	-60	-60	NE False Bay	South Shetland Islands	77.5	0.05	14.5	0.04	0.09	0	0.1	3.19	5.28	0.19	0.01				100.95					110				32								9					21
P.1253.5	Smellie et al. (1984)	-62.58	-62.833	-60	-60.5	NE False Bay	South Shetland Islands	53.2	0.97	16.9	2.49	6.23	0.16	6.2	9.7	3.14	0.72	0.17				99.88					184				28		80						20					10				3
P.1256.2	Smellie et al. (1984)	-62.58	-62.833	-60	-60.5	NE False Bay	South Shetland Islands	47.6	1.44	9	2.9	7.25	0.2	14.8	13.47	1.81	0.39	0.03				98.89					85				15		570						13					8
P.1259.2	Smellie et al. (1984)	-62.58	-62.833	-60	-60.5	NE False Bay	South Shetland Islands	61.1	0.59	16.3	1.49	3.73	0.11	2.6	6.19	3.97	1.53	0.15				97.76					307				32								23					15
P.1406.1	Smellie et al. (1984)	-62.05	-62.05	-58.4	-58.4	Ullmann Spur, Hennequin Formation	South Shetland Islands	54.7	0.81	18.9	2.18	5.45	0.14	4.1	7.27	2.58	2.42	0.24				98.79					391				45								22					26
P.1408.1	Smellie et al. (1984)	-62.05	-62.05	-58.4	-58.4	Ullmann Spur, Hennequin Formation	South Shetland Islands	50.5	0.91	19.2	2.1	5.24	0.18	4.9	8.4	3.61	0.6	0.32				95.96					390				49		30						20					28
P.1409.1	Smellie et al. (1984)	-62.05	-62.05	-58.4	-58.4	Ullmann Spur, Hennequin Formation	South Shetland Islands	56.8	0.86	17.8	2.27	5.67	0.14	5.2	4.98	3.33	3.19	0.18				100.42					559				46								23					27				4
P.1411.1	Smellie et al. (1984)	-62.05	-62.05	-58.4	-58.4	Ezcurra Inlet, Fildes Formation	South Shetland Islands	59	0.84	18.3	2.13	5.33	0.15	4.3	6.53	3.84	2.24	0.19				102.85					352				49								22					30
P.1415.1	Smellie et al. (1984)	-62.05	-62.05	-58.4	-58.4	Admiralen Peak, Hennequin Formation	South Shetland Islands	55.7	1.02	16.1	2.54	6.36	0.15	6.6	5.38	3.27	1.59	0.2				98.91					596				43		10						22					25				4
P.1416.1	Smellie et al. (1984)	-62.05	-62.05	-58.4	-58.4	Ezcurra Inlet, Fildes Formation	South Shetland Islands	48.9	0.96	15.8	2.71	6.78	0.25	9.3	9.78	2.61	0.24	0.23				97.56					149				25		62						29					14				3
P.1418.2	Smellie et al. (1984)	-62.5	-62.05	-59	-58.4	O'Cain Point, Fildes Formation	South Shetland Islands	66.2	1	14.7	1.6	4	0.18	0.7	3.81	5.36	1.63	0.27				99.45					479				59								22					34				5
P.1421.1	Smellie et al. (1984)	-62.5	-62.05	-59	-59	O'Cain Point, Fildes Formation	South Shetland Islands	66.2	1	14.7	1.58	3.95	0.2	0.7	4.27	5.11	1.15	0.26				99.12					436				56								22					35				7
P.1427.1	Smellie et al. (1984)	-62.05	-62.05	-58.4	-58.4	Barton Peninsula, Fildes Formation	South Shetland Islands	57.8	1.05	17.8	2.42	6.05	0.17	5.35	4.95	2.64	1.68	0.21				100.12					377				43		10						23					25
P.1430.1	Smellie et al. (1984)	-62.05	-62.05	-58.4	-58.4		South Shetland Islands	58.2	0.77	16.9	2.24	5.61	0.21	4.1	7.72	3.33	2.18	0.21				101.47					407				52								25					29				3
P.1431.1	Smellie et al. (1984)	-62.05	-62.05	-58.4	-58.4	Barton Peninsula, Fildes Formation	South Shetland Islands	55.9	0.78	16.2	2.38	5.95		7	9.47	2.5	0.42	0.18				100.78					140				27		40						24					17
P.1435.1	Smellie et al. (1984)	-62.05	-62.05	-58.4	-58.4	Barton Peninsula, Fildes Formation	South Shetland Islands	54.2	0.84	19.8	2.44	6.1	0.15	3.9	8.39	3.69	0.27	0.25				100.03					178				43		10						22					28				4
P.1440.1	Smellie et al. (1984)	-62.05	-62.05	-58.4	-58.4	Barton Peninsula, Fildes Formation	South Shetland Islands	47.8	0.61	20.3	2.46	6.16	0.15	7.6	10.52	2.85	0.43	0.09				98.97					155				11		40						22					14
P.1443.1	Smellie et al. (1984)	-62.05	-62.05	-58.4	-58.4	Barton Peninsula, Fildes Formation	South Shetland Islands	53.4	0.93	17.5	2.58	6.44	0.16	6.1	8.08	3.48	1.07	0.21				99.95					330				39		20						23					25
P.1452.2	Smellie et al. (1984)	-62.05	-62.05	-58.4	-58.4	Keller Peninsula, Hennequin Formation	South Shetland Islands	56.3	0.76	6.1	2.22	5.55	0.12	6.4	6.38	3.53	2.04	0.23				89.63					349				48		30						24					22				6
P.1454.1	Smellie et al. (1984)	-62.05	-62.05	-58.4	-58.4	Keller Peninsula, Hennequin Formation	South Shetland Islands	55.2	0.85	16.6	2.22	5.54	0.2	5.8	8.5	3.12	1.23	0.18				99.44					304				48		30						24					29				3
P.1458.2	Smellie et al. (1984)	-62.05	-62.05	-58.4	-58.4	Keller Peninsula, Hennequin Formation	South Shetland Islands	57.9	1.06	17	2.28	5.71	0.17	3.6	6.35	3.94	1.72	0.4				100.13					458				63								24					38				6
P.1458.3	Smellie et al. (1984)	-62.05	-62.05	-58.4	-58.4	Keller Peninsula, Hennequin Formation	South Shetland Islands	56.4	1.05	16	2.26	5.64	0.17	3.5	6.58	3.83	2.05	0.38				97.86					461				62								24					26				4
P.1463.1	Smellie et al. (1984)	-62.05	-62.05	-58.4	-58.4	Keller Peninsula, Hennequin Formation	South Shetland Islands	49.8	0.79	15.3	2.44	6.11	0.15	7.4	9.39	2.67	0.2	0.2				94.45					129				37		30						23					17
P.1464.2	Smellie et al. (1984)	-62.05	-62.05	-58.4	-58.4	Keller Peninsula, Hennequin Formation	South Shetland Islands	56.5	0.86	15.6	2.23	5.58	0.18	4.8	6.28	2.57	1.83	0.22				96.65					376				45								24					21
P.1465.1	Smellie et al. (1984)	-62.05	-62.05	-58.4	-58.4	Keller Peninsula, Hennequin Formation	South Shetland Islands	57.6	0.7	16.8	2.04	5.1	0.11	6	5.01	3.66	2.33	0.13				99.48					452				49		20						23					20
P.1472.7	Smellie et al. (1984)	-62.05	-62.5	-58.4	-59	Weaver Peninsula, Fildes Formation	South Shetland Islands	45.1	0.51	19.5	2.1	5.25	0.11	8.5	13.78	1.49	0.19	0.07				96.6					53				12		30						21					8
P.1473.2	Smellie et al. (1984)	-62.05	-62.5	-58.4	-59	Weaver Peninsula, Fildes Formation	South Shetland Islands	53.6	0.69	18.3	2.35	5.88	0.15	5.7	8.37	2.96	1.33	0.16				99.49					294				35		10						23					23
P.1473.4	Smellie et al. (1984)	-62.05	-62.05	-58.4	-58.4	Weaver Peninsula, Fildes Formation	South Shetland Islands	50.9	0.72	19.7	2.29	5.73	0.14	7.1	10.49	2.82	0.53	0.12				100.54					154				18		21						25					12
P.1473.5	Smellie et al. (1984)	-62.05	-62.5	-58.4	-59	Marian Cove	South Shetland Islands	50	0.55	23.4	1.93	4.82	0.09	5	12.7	2.23	0.49	0.1				101.31					126				12		20						24					13
P.1475.7	Smellie et al. (1984)	-62.05	-62.05	-58.4	-58.4	Weaver Peninsula, Fildes Formation	South Shetland Islands	55.9	1.18	15.9	2.67	6.68	0.18	4.1	6.65	3.06	1.62	0.41				98.35					439				65								22					39				5
P.1480.1	Smellie et al. (1984)	-62.05	-62.05	-58.4	-58.4	Weaver Peninsula, Fildes Formation	South Shetland Islands	54.9	0.51	17.6	2.4	6	0.18	5.76	8.23	3.07	0.64	0.13				99.42					206				18								25					14				3
P.1480.2	Smellie et al. (1984)	-62.05	-62.5	-58.4	-58.4	Weaver Peninsula, Fildes Formation	South Shetland Islands	48.5	0.59	19.9	2.27	5.68	0.14	5.9	11.99	1.81	0.99	0.07				97.84					175				13		20						20					12
P.1481.1	Smellie et al. (1984)	-62.05	-62.05	-58.4	-58.4	Weaver Peninsula, Fildes Formation	South Shetland Islands	47.3	0.76	16.3	2.56	6.4	0.12	9.78	12.32	1.37	0.45	0.1				97.46					177				20		20						21					22				4
P.1484.1	Smellie et al. (1984)	-62.35	-62.35	-59.6	-59.6	Coppermine Peninsula, Coopermine Formation	South Shetland Islands	52.1	0.76	17.5	2.36	5.9	0.17	7.5	11.31	2.65	1	0.15				101.4									31		200						18					24				4
P.1492.2	Smellie et al. (1984)	-62.35	-62.35	-59.6	-59.6	Coppermine Peninsula, Coopermine Formation	South Shetland Islands	50.9	0.75	16.9	2.46	6.16	0.15	8.3	12.06	2.3	0.21	0.02				100.21									15		290						18					13
P.1494.2	Smellie et al. (1984)	-62.35	-62.35	-59.6	-59.6	Coppermine Peninsula, Coopermine Formation	South Shetland Islands	51.8	1.07	17.6	2.6	6.51	0.16	8.3	10.55	2.56	0.71	0.34				102.2					233				32		210						21					24
P.15468	Smellie et al. (1984)	-62.58	-62.83	-60	-60.5	Negro Hill, Byers Peninsula	South Shetland Islands	49.9	1.04	16	2.4	8.01	0.2	6.8	11.79	2.68	0.21	0.15				99.18					68				15		124											6
P.1603.1	Smellie et al. (1984)	-62.35	-62.05	-59.6	-60	Catharina Point, Coopermine Formation	South Shetland Islands	53.4	0.88	18.4	2.38	5.94	0.14	6.4	9.37	3.38	0.94	0.22				101.45					240				17		140						25					10				4
P.1607.1	Smellie et al. (1984)	-62.35	-62.35	-59.6	-59.6	Coppermine Peninsula, Coopermine Formation	South Shetland Islands	50.8	0.88	14.4	2.56	6.41	0.16	12.2	9.05	2.73	0.49	0.37				100.05					206				27		210						21					23				3
P.1613.1	Smellie et al. (1984)	-62.35	-62.05	-59.6	-58.4	Fort William, Coopermine Formation	South Shetland Islands	51.1	0.8	16.9	2.57	6.42	0.16	9.6	10.43	2.93	0.87	0.23				102.01					308				28		350						19					19				3
P.215.1	Smellie et al. (1984)	-63.2	-63.2	-62	-62	Cape Hooker	South Shetland Islands	71.4	0.39	14.4	0.86	2.15	0.09	1.1	2.4	4.6	2.52	0.05				99.96					318				34								15					18
P.215.3	Smellie et al. (1984)	-62.58	-62.83	-60	-60.5	Half Moon Island	South Shetland Islands	54.8	0.69	16	2.32	5.81	0.19	6.2	8.68	2.96	0.74	0.11				98.5					105				23		70						19					10
P.219.2	Smellie et al. (1984)	-63.2	-63.2	-62	-62		South Shetland Islands	77.1	0.16	13.5	0.29	0.72	0.04	0.2	0.45	4.24	4.85	0.04				101.59					407				43								14					22				6
P.232.1	Smellie et al. (1984)	-62.05	-62.05	-58.4	-58.4	Potter Peninsula, Fildes Formation	South Shetland Islands	50.6	0.82	20.1	2.45	6.13	0.16	4.6	10.1	3.2	0.66	0.11				98.93					209				15		10						22					11				4
P.232.6	Smellie et al. (1984)	-62.05	-62.05	-58.4	-58.4	Potter Peninsula, Fildes Formation	South Shetland Islands	49.9	1	18.2	2.5	6.25	0.26	5.6	10.75	3.39	0.31	0.22				98.38					205				31		30						23					16				4
P.317.12	Smellie et al. (1984)	-62.05	-62.05	-58.4	-58.4	Pottinger Point, Hennequin Formation	South Shetland Islands	51.7	0.81	16.4	2.54	6.35	0.15	5	6.85	2.09	2.51	0.16				94.56					343				33		10						22					17				7
P.317.2	Smellie et al. (1984)	-62.05	-62.05	-58.4	-58.4	Pottinger Point, Hennequin Formation	South Shetland Islands	54.1	0.75	17.4	2.21	5.53	0.13	4.8	8.88	2.76	1.78	0.22				98.56					309				40		20						24					19
P.318.2	Smellie et al. (1984)	-62.05	-62.05	-58.4	-58.4	Barton Peninsula, Fildes Formation	South Shetland Islands	56.7	0.77	17	2.22	5.54	0.14	5.36	6.89	3.75	2.03	0.22				100.62					378				42		10						23					21				4
P.321.2	Smellie et al. (1984)	-62.05	-62.05	-58.4	-58.4	Barton Peninsula, Fildes Formation	South Shetland Islands	51.3	1.66	13.9	3.31	8.27	0.22	5.8	8.63	3.18	0.21	0.29				96.77					152				43								24					19				9
P.328.2	Smellie et al. (1984)	-62.05	-62.05	-58.4	-58.4	Barton Peninsula, Fildes Formation	South Shetland Islands	51.9	1.58	14.8	3.17	7.93	0.2	5.5	8.2	2.79	1.3	0.3				97.67					373				31								25					17				11
P.363.1	Smellie et al. (1984)	-62.05	-62.05	-58.4	-58.4	Keller Peninsula, Hennequin Formation	South Shetland Islands	53.2	0.94	18.5	2.27	5.67	0.15	3.4	9.95	3.69	0.34	0.25				98.36					294				43								23					18				6
P.363.3	Smellie et al. (1984)	-62.05	-62.05	-58.4	-58.4	Keller Peninsula, Hennequin Formation	South Shetland Islands	53.2	0.88	15.9	2.29	5.73	0.14	5.3	8.13	3.54	0.92	0.18				96.21					406				58		40						27					24				10
P.404.3	Smellie et al. (1984)	-63.2	-63.2	-62	-62	Cape Hooker	South Shetland Islands	60.4	0.74	14.8	1.71	4.27	0.11	2.1	5.34	4.26	1.78	0.18				95.69					310				25		10						20					9				3
P.405.6	Smellie et al. (1984)	-63.2	-63.2	-62	-62		South Shetland Islands	54.9	1.03	15.3	2.72	6.8	0.2	5.9	7.55	2.91	1.02	0.11				98.44					154				16		20						24
P.407.3	Smellie et al. (1984)	-63.2	-63.2	-62	-62	Cape Wallace	South Shetland Islands	75.1	0.13	13.6	0.46	1.16	0.04	0.3	0.73	3.56	5.6	0.03				100.71					421				37								14					23				3
P.407.4	Smellie et al. (1984)	-63.2	-63.2	-62	-62	Cape Wallace	South Shetland Islands	64	0.54	15.2	1.62	4.05	0.12	1.9	4.44	4.12	1.82	0.12				97.93					319				37								19					19				5
P.411.3	Smellie et al. (1984)					President Head	South Shetland Islands	58.4	1.02	17.2	2.31	5.76	0.13	3.4	7.72	3.74	0.89	0.14				100.71					312				32		10						21					15				4
P.417.2	Smellie et al. (1984)					President Head	South Shetland Islands	68.5	0.58	15.3	1.43	3.57	0.09	1.9	4.32	4.05	0.96	0.11				100.81					382				39								17					26				4
P.419.1	Smellie et al. (1984)	-62.58	-62.833	-60	-60.5	east of Brunow Bay	South Shetland Islands	54.9	0.84	16.2	2.33	5.84	0.1	5.8	8.44	4.2	0.42	0.16				99.23					132				25								23					11
P.419.2	Smellie et al. (1984)	-62.58	-62.833	-60	-60.5	east of Brunow Bay	South Shetland Islands	52.8	0.96	17.4	2.47	6.17	0.15	5.2	8.37	4.66	0.82	0.23				99.23					258				34								25					13				5
P.419.3	Smellie et al. (1984)	-62.58	-62.833	-60	-60.5	east of Brunow Bay	South Shetland Islands	44.7	0.98	15.6	3.27	8.18	0.18	12.2	14.61	0.95	0.11	0.01				100.79					30				10		50						17					7
P.419.4	Smellie et al. (1984)	-62.58	-62.5	-60	-59.6	east of Brunow Bay	South Shetland Islands	67.7	0.39	16.4	0.84	2.09	0.02	0.8	2.22	5.14	3.67	0.09				99.36					661				34								21					23				4
P.422.3	Smellie et al. (1984)	-62.58	-62.833	-60	-60.5	near Renier Point	South Shetland Islands	51.2	1.11	18.5	2.42	6.05	0.15	5	10.83	3.36	0.65	0.63				99.9					217				30		20						22					12
P.424.1	Smellie et al. (1984)	-62.58	-62.83	-60	-60.5	Renier Point	South Shetland Islands	49	1.74	14.5	4.23	10.58	0.16	7.6	5.12	5.2	0.14	0.19				98.46					100				12		60						24
P.424.3	Smellie et al. (1984)	-62.58	-62.83	-60	-60.5	Renier Point	South Shetland Islands	46.2	1.25	18.9	3.15	7.87	0.12	6.7	9.01	2.67	0.15	0.13				96.15					118				9		30						28
P.431.3	Smellie et al. (1984)	-62.5	-62.5	-60	-60	Ephraim bluff	South Shetland Islands	53.8	0.77	16.1	2.58	6.45	0.22	7.5	10.84	2.74	0.24	0.13				101.37					65				14		80						21
P.433.5	Smellie et al. (1984)	-62.05	-62.05	-58.4	-58.4	fort Point	South Shetland Islands	59.7	0.9	16.7	2.13	5.31	0.15	4	6.2	3.7	2.38	0.21				101.38					392				50								21					27				4
P.440.1	Smellie et al. (1984)	-62.05	-62.05	-58.4	-58.4	Dufayel Island, Hennequin Formation	South Shetland Islands	55.7	1.18	14.9	2.66	6.66	0.15	5.4	4.66	3.4	3.16	0.26				98.13					384				43								26					20				3
P.443.16	Smellie et al. (1984)	-62.05	-62.05	-58.4	-58.4	Point Thomas, Hennequin Formation	South Shetland Islands	58	0.91	17.7	2.28	5.71	0.15	3.4	7.25	3.61	1.26	0.22				100.49					266				56		10						24					26				4
P.443.5	Smellie et al. (1984)	-62.05	-62.05	-58.4	-58.4	Point Thomas, Hennequin Formation	South Shetland Islands	64.7	0.85	15.1	1.55	3.86	0.14	0.9	3.96	4.52	2.6	0.23				98.41					543				69								21					37				5
P.443.5	Smellie et al. (1984)	-62.05	-62.05	-58.4	-58.4	Jardine Peak, Hennequin Formation	South Shetland Islands	58.5	0.79	17.5	2.06	5.15	0.11	6.4	7.69	3.85	1.13	0.13				103.31					278				21		120						20					18
P.444.10	Smellie et al. (1984)	-62.05	-62.05	-58.4	-58.4	Point Thomas, Hennequin Formation	South Shetland Islands	54.2	0.77	18.7	2.46	6.16	0.15	5.5	8.7	3.54	1.2	0.16				101.54					229				30		20						26					13
P.466.1	Smellie et al. (1984)	-62.58	-62.83	-60	-60.5	Hannah Point	South Shetland Islands	53.7	1.34	15.5	3.02	7.55	0.22	4.7	8.82	3.15	0.75	0.12				98.87					158				19		30						24
P.476.1	Smellie et al. (1984)	-62.58	-62.83	-60	-60.5	Hannah Point	South Shetland Islands	56	1.44	15.4	2.74	6.86	0.22	3.4	8.79	3.34	1.21	0.26				99.66					236				33		20						20					12				6
P.495.1	Smellie et al. (1984)	-62.35	-62.35	-59.6	-59.6	Edwards Point	South Shetland Islands	53.5	0.88	16.8	2.51	6.28	0.17	6	8.11	3.32	0.72	0.08				98.37					158				12		20						18
P.51.1	Smellie et al. (1984)	-62.58	-62	-60	-60.5	Gleaner Heights	South Shetland Islands	50.3	1.08	18.1	2.55	6.38	0.15	5	11.27	4.15	0.56	0.17				99.71					175				8		110						24					9				3
P.535.2	Smellie et al. (1984)	-62.05	-62.05	-58.4	-58.4		South Shetland Islands	63.1	0.58	16.5	1.4	3.5	0.11	2.5	4.95	4.2	2.72	0.16				99.72					400				46								19					25
P.535.3	Smellie et al. (1984)	-62.05	-62.05	-58.4	-58.4		South Shetland Islands	61.7	0.57	15.3	1.29	3.22	0.13	2.9	4.6	4	2.5	0.19				96.4					436				44								21					25
P.535.4	Smellie et al. (1984)	-62.05	-62.05	-58.4	-58.4	Barton Peninsula, Fildes Formation	South Shetland Islands	57.4	0.87	17.9	2.29	5.73	0.15	6.2	8.39	3.01	1.1	0.18				103.22					244				36								23					22				5
P.54.1	Smellie et al. (1984)	-62.5	-62.5	-60	-60	Mount Plymouth	South Shetland Islands	48.4	1.26	17.1	2.74	6.84	0.16	8.2	11.45	3.96	0.42	0.18				100.71					124				14		470						21					12				3
P.547.2	Smellie et al. (1984)	-62.05	-62.05	-58.4	-58.4	north of Sphinx Hill, Hennequin Formation	South Shetland Islands	56.7	1	20.1	2.15	5.37	0.15	3.4	7.28	4.36	1.78	0.32				102.61					437				59								23					34
P.55.1	Smellie et al. (1984)	-62.5	-62.5	-60	-60	Mount Plymouth	South Shetland Islands	48.2	1.31	15.5	2.81	7.02	0.16	10.2	10.79	3.62	0.49	0.19				100.29					143				20		700						19					14				4
P.662.1	Smellie et al. (1984)	-62.05	-62.05	-58.4	-58.4	Barton Peninsula, Fildes Formation	South Shetland Islands	52.4	0.74	15.7	2.23	5.57	0.15	6.7	7.51	2.68	1.44	0.2				95.32																	24
P.663.1	Smellie et al. (1984)	-62.05	-62.05	-58.4	-58.4	Barton Peninsula, Fildes Formation	South Shetland Islands	50.8	1.36	14.7	2.86	7.15	0.23	5.8	8.94	3	0.18	0.31				95.33					131				47		17						27					15				3
P.669.1	Smellie et al. (1984)	-62.05	-62.05	-58.4	-58.4	Barton Peninsula, Fildes Formation	South Shetland Islands	51.6	1.67	13.9	3.25	8.13	0.21	5.8	8.73	3.15	0.2	0.29				96.93					166				40								25					13				5
P.674.1	Smellie et al. (1984)	-62.05	-62.05	-58.4	-58.4	Barton Peninsula, Fildes Formation	South Shetland Islands	53.8	0.76	15.8	2.38	5.96	0.15	6	8.78	2.38	0.99	0.17				97.17					323				37		10						22					13				3
P.676.1	Smellie et al. (1984)	-62.05	-62.05	-58.4	-58.4		South Shetland Islands	61.7	0.58	16.5	1.52	3.79	0.14	4	5.43	4.23	2.28	0.16				100.33					447				46		24						17					20				4
P.679.1	Smellie et al. (1984)	-62.05	-62.05	-58.4	-58.4		South Shetland Islands	49.1	1.09	21.13	2.4	8	0.19	7.43	5.27	2.82	2.14	0.16				99.73					637				52		29						20					22				4
P.679.1	Smellie et al. (1984)	-62.05	-62.05	-58.4	-58.4	Barton Peninsula, Fildes Formation	South Shetland Islands	48.7	1.17	21.1	2.71	6.78	0.17	7.1	4.56	2.77	2.77	0.15				97.98					686				49		20						32					17
P.680.1	Smellie et al. (1984)	-62.05	-62.05	-58.4	-58.4		South Shetland Islands	60	0.59	16	1.84	4.59	0.16	5.6	5.58	3.82	1.59	0.19				99.96					334				36		45											16				5
P.681.1	Smellie et al. (1984)	-62.05	-62.05	-58.4	-58.4		South Shetland Islands	62.1	0.6	16.2	1.48	3.69	0.14	3.5	4.76	4.17	2.69	0.19				99.52					497				51		21						17					21				5
P.681.3	Smellie et al. (1984)	-62.05	-62.05	-58.4	-58.4		South Shetland Islands	61.2	0.65	15.9	1.46	3.65	0.12	3	5.12	4.05	2.59	0.19				97.93					440				44								23					19				4
P.681.3	Smellie et al. (1984)	-62.05	-62.05	-58.4	-58.4		South Shetland Islands	61.4	0.66	16	1.55	3.88	0.15	4	5.24	3.93	2.23	0.2				99.24					452				47		21						16					21				5
P.682.1	Smellie et al. (1984)	-62.05	-62.05	-58.4	-58.4		South Shetland Islands	63.2	0.58	16.1	1.44	3.59	0.14	3.2	4.94	3.91	2.68	0.15				99.93					466				46		19						16					20				5
P.683.4	Smellie et al. (1984)	-62.05	-62.05	-58.4	-58.4	Barton Peninsula, Fildes Formation	South Shetland Islands	47.5	0.71	16.9	2.51	6.29	0.21	8.5	9.9	3.02	0.53	0.11				96.18					145				15		30						24
P.685.4	Smellie et al. (1984)	-62.05	-62.05	-58.4	-58.4	Three Brothers Hill, Potter Peninsula, Fildes Formation	South Shetland Islands	56.5	0.77	17.8	2.15	5.39	0.13	4.3	6.9	3.65	2.05	0.18				99.82					354				51		20						22					20				4
P.693.1	Smellie et al. (1984)	-62.05	-62.05	-58.4	-58.4	Potter Peninsula, Fildes Formation	South Shetland Islands	51	1.03	17.6	2.56	6.41	0.18	6.4	9.62	3.13	0.47	0.25				98.65					314				17		50						24					13				5
P.694.2	Smellie et al. (1984)	-62.05	-62.05	-58.4	-58.4	Potter Peninsula, Fildes Formation	South Shetland Islands	51.1	1.15	15.5	2.86	7.16	0.2	7.1	8.27	2.93	0.75	0.22				97.24					197				21		20						22					13				5
P.696.1	Smellie et al. (1984)	-62.05	-62.05	-58.4	-58.4	Potter Peninsula, Fildes Formation	South Shetland Islands	53.5	0.63	16.1	2.2	5.49	0.14	6.6	9.31	2.48	0.36	0.17				96.98					173				35		20						23					14
P.696.2	Smellie et al. (1984)	-62.05	-62.05	-58.4	-58.4	Potter Peninsula,, Fildes Formation	South Shetland Islands	55.2	0.61	17.2	2.15	5.38	0.13	6.2	7.92	3.04	1.15	0.18				99.16					294				22		20						24					15
P.697.2	Smellie et al. (1984)	-62.05	-62.05	-58.4	-58.4	Potter Peninsula, Fildes Formation	South Shetland Islands	53.1	0.97	17.2	2.46	6.15	0.16	5.7	8	3.36	1	0.22				98.32					333				20		20						21					16
P.751.1	Smellie et al. (1984)	-62.05	-62.05	-58.4	-58.4	Potter Peninsula, Fildes Formation	South Shetland Islands	49.4	1.01	18	2.62	6.54	0.2	5.5	11.29	2.91	0.2	0.18				97.85					134				18		20						22					13				5
P.754.2	Smellie et al. (1984)	-62.05	-62.05	-58.4	-58.4	Potter Peninsula, Fildes Formation	South Shetland Islands	53.1	1.37	16.4	2.76	6.9	0.18	3.8	8.98	3.6	0.38	0.22				97.69					242				17								23					18				3
P.757.2	Smellie et al. (1984)	-62.05	-62.05	-58.4	-58.4	Potter Peninsula, Fildes Formation	South Shetland Islands	55.6	1.44	14.4	2.74	6.84	0.22	3.5	7.71	3.52	1.25	0.3				97.52					318				36								25					19				3
P.758.1	Smellie et al. (1984)	-62.05	-62.05	-58.4	-58.4	Potter Peninsula, Fildes Formation	South Shetland Islands	52.3	1.49	14.9	2.93	7.32	0.18	4	8.1	3.17	0.63	0.28				95.3					297				35								23					23				4
P.760.1	Smellie et al. (1984)	-62.05	-62.05	-58.4	-58.4	Potter Peninsula, Fildes Formation	South Shetland Islands	49.3	1.05	17.9	2.65	9.63	0.16	6.3	10.71	2.9	0.33	0.2				101.13					179				28		40						22					15
P.840.3	Smellie et al. (1984)	-62.35	-62.35	-59.6	-59.6	Coppermine Peninsula, Coopermine Formation	South Shetland Islands	49.8	0.67	17.1	2.46	6.14	0.14	9.8	11.39	2.24	0.34	0.12				100.2					157				16		360						20
P.841.12	Smellie et al. (1984)	-62.35	-62.35	-59.6	-59.6	Coppermine Peninsula, Coopermine Formation	South Shetland Islands	51.5	0.66	18.4	2.37	5.94	0.14	7.9	11.03	2.73	0.69	0.11				101.47					156				12		246						20
P.841.2	Smellie et al. (1984)	-62.35	-62.35	-59.6	-59.6	Coppermine Peninsula, Coopermine Formation	South Shetland Islands	47.9	0.86	13.9	2.67	6.68	0.15	11.7	9.66	2.03	0.63	0.26				96.44					265				23		360						22					8				4
P.841.6	Smellie et al. (1984)	-62.35	-62.35	-59.6	-59.6	Coppermine Peninsula, Coopermine Formation	South Shetland Islands	50.3	1.05	17.4	2.21	5.52	0.12	5.4	8.64	4.97	1.59	0.3				97.5					373				27		89						25					11				3
P.841.7	Smellie et al. (1984)	-62.35	-62.35	-59.6	-59.6	Coppermine Peninsula, Coopermine Formation	South Shetland Islands	47.5	0.75	14.1	2.57	6.43	0.15	12.2	9.93	2.76	0.52	0.2				97.11					240				20		360						21					7
P.841.9	Smellie et al. (1984)	-62.35	-62.35	-59.6	-59.6	Coppermine Peninsula, Coopermine Formation	South Shetland Islands	49.5	0.99	17.28	2.29	5.73	0.13	6.1	8.65	4.34	1.76	0.25				97.02					859				26		80						22					9
P.842.4	Smellie et al. (1984)	-62.5	-62.35	-60	-59.6	Coopermine Formation	South Shetland Islands	51.7	1.06	16.7	2.59	6.48	0.15	8.8	10.63	2.59	0.69	0.11				101.5					229				31		230						21					12
P.842.9	Smellie et al. (1984)	-62.35	-62.35	-59.6	-59.6	Coppermine Peninsula, Coopermine Formation	South Shetland Islands	50.3	1.1	16.5	2.57	6.43	0.17	8.9	10.48	2.56	0.54	0.48				100.03					224				33		200						21					12				4
P.843.1	Smellie et al. (1984)	-62.35	-62.5	-59.6	-59.6	The Triplets, Coopermine Formation	South Shetland Islands	49.2	0.91	15.5	2.64	6.59	0.16	10.2	10.08	2.42	0.33	0.14				98.17					120				15		291						23
P.901.3	Smellie et al. (1984)	-62.58	-62.83	-60	-60.5	Elephant Point	South Shetland Islands	55.6	1.6	14.55	3.19	7.98	0.21	3.6	7.44	3.45	0.87	0.24				98.73					206				35								21					18				11
P.903.4	Smellie et al. (1984)	-62.58	-62.83	-60	-60.5	Elephant Point	South Shetland Islands	52.1	2	15.2	3.65	9.12	0.23	4.4	8.28	3.41	0.51	0.23				99.13					153				28								21					16				4
P.904.1	Smellie et al. (1984)	-62.58	-62.83	-60	-60.5	Elephant Point	South Shetland Islands	50.6	1.83	15.5	3.56	8.91	0.23	4.7	8.97	2.23	0.71	0.19				97.43					140				19		20						22					18
P.905.2	Smellie et al. (1984)	-62.35	-62.35	-59.6	-59.6	Robert Point	South Shetland Islands	55	0.72	18.4	2.05	5.13		4.1	7.73	3.8	0.69	0.09				97.71					178				14								23					8				6
P.917.1	Smellie et al. (1984)	-62.35	-62.35	-59.6	-59.6	Edwards Point	South Shetland Islands	59.4	0.91	17.7	2.08	5.21	0.16	3.9	5.6	4.57	1.16	0.15				100.84					309				26								24					17
P.922.2	Smellie et al. (1984)	-62.5	-62.05	-60	-58.4	duff Point, Coopermine Formation	South Shetland Islands	49.6	0.89	17.7	2.57	6.42	0.14	6.5	10.73	2.76	0.76	0.2				98.27					226				21		90						23					15
P.926.7	Smellie et al. (1984)	-62.35	-62.05	-59.6	-58.4	Express Island, Coopermine Formation	South Shetland Islands	50.4	0.86	19.1	2.6	6.5	0.16	6.3	11.35	2.89	0.43	0.13				100.72					85				10		90						19					11				3
43	Smellie et al. (1996)	-62.62	-62.62	-60.23	-60.23	Mount Bowles	South Shetland Islands	53.84	1.29	17.09	9.72		0.19	3.59	8.73	3.54	0.32	0.23				100.2	1.66				143				28		31											7				4	14
44	Smellie et al. (1996)	-62.62	-62.62	-60.23	-60.23	Mount Bowles	South Shetland Islands	54.05	1.73	15.35	11.35		0.21	3.6	5.68	4.35	1.01	0.27				99.8	2.2				298				34		15											7				7	19
230	Smellie et al. (1996)	-62.65	-62.65	-60.25	-60.25	1.6 km SE of Burdick Peak	South Shetland Islands	46.64	0.99	16.21	10.31		0.17	11.42	10.7	2.92	0.34	0.18				99.5	-0.38				85				11		594											0				2	14
260	Smellie et al. (1996)	-62.56	-62.56	-60.13	-60.13	1 km S of Samuel Peak	South Shetland Islands	47.4	1.15	16.16	10.51		0.17	10.96	10.37	3.2	0.46	0.21				100.09	-0.5				126				27		443											1				6	27
262	Smellie et al. (1996)	-62.62	-62.62	-60.13	-60.13	5.5 km E of Mount Bowles	South Shetland Islands	53.13	1.27	16.04	10.93		0.18	4.89	5.92	4.67	0.49	0.21				99.87	2.14				218				21		92											4				4	24
278	Smellie et al. (1996)	-62.56	-62.56	-60.31	-60.31	Siddons Point	South Shetland Islands	50.42	0.97	17.86	9.68		0.16	6.74	10.74	2.56	0.5	0.16				100.19	0.4				186				13		126											1				3	17
407	Smellie et al. (1996)	-62.64	-62.64	-60.6	-60.6	Hannah Point (middle)	South Shetland Islands	51.76	1.39	15.92	11.43		0.2	4.63	7.59	3.64	1.59	0.26				99.97	1.56				272				35		43											10				6	16
434	Smellie et al. (1996)	-62.64	-62.64	-60.6	-60.6	Hannah Point (top)	South Shetland Islands	52.6	1.21	16.51	11.27		0.18	4.52	8.71	3.18	0.62	0.13				99.97	1.04				115				19		60											0				4	11
105E	Smellie et al. (1996)	-62.69	-62.69	-60.33	-60.33	0.6 km NE of Moores Peak, E Hurd Peninsula	South Shetland Islands	47.22	1.08	16.96	10.98		0.18	9	9.98	1.83	0.3	0.17				100.08	2.38				67				28		488											3				4	23
258A	Smellie et al. (1996)	-62.66	-62.66	-60.27	-60.27	Willan Nunatak Pluton	South Shetland Islands	59.75	0.59	18.04	6.22		0.12	3.06	6.68	3.77	1.29	0.13				100.03	0.38				336				27		19											1				3	14
258B	Smellie et al. (1996)	-62.66	-62.66	-60.27	-60.27	Willan Nunatak Pluton	South Shetland Islands	58.32	0.62	18.46	6.57		0.11	3.17	7.18	3.77	1.09	0.14				99.89	0.46				277				25		18											4				3	10
325C3	Smellie et al. (1996)	-62.49	-62.49	-60.75	-60.75	Cape Shirreff	South Shetland Islands	48.55	1.24	18.12	10.85		0.17	6.52	10.61	2.02	0.31	0.29				99.49	0.81				81				39		128											3				5	22
45D	Smellie et al. (1996)	-62.66	-62.66	-60.27	-60.27	0.9 km W of Willan Nunatak	South Shetland Islands	57.49	0.96	17.29	8.25		0.14	3.45	6.91	3.67	1.29	0.19				100.37	0.73				297				32		20											4				4	28
80A	Smellie et al. (1996)	-62.66	-62.66	-60.27	-60.27	0.9 km W of Willan Nunatak	South Shetland Islands	55.87	1.05	17.04	9.11		0.15	3.76	7.38	3.81	1.07	0.18				100.31	0.89				309				29		32											13				3	34
9	Tarney et al. (1977)	-62.58	-62.83	-60	-60.5	Byers Peninsula	South Shetland Islands	51.5	0.98	15.35	9.7		0.19	5.83	10.82	2.52	0.45	0.25				97.59					144				21		178											11				5
10	Tarney et al. (1977)	-62.58	-62.83	-60	-60.5		South Shetland Islands	51.41	0.73	16.47	10.72		0.23	6.64	9.8	3.24	0.51	0.15				99.9					183				21		81											8				3
11	Tarney et al. (1977)	-62.06	-62.06	-57.56	-57.56		South Shetland Islands	48.87	1.23	15.44	10.59		0.19	9.07	10.1	3.74	0.53	0.3				100.06					186				26		508						22					10				2
12	Tarney et al. (1977)	-62.03	-62.03	-56.45	-56.45		South Shetland Islands	53.94	0.65	18.54	7.29		0.13	5.19	9.73	3.59	0.56	0.06				99.68					110				10		68						20					3				1
P.640.1B	Weavers et al. (1979)	-62.03	-62.03	-56.45	-56.45		South Shetland Islands	52.88	0.64	17.68	7.43		0.13	6.14	10.3	3.54	0.47	0.06				99.27					70				10		130			2.02	1.25	0.65	19	1.9				2				1	5.47
P.640.3A	Weavers et al. (1979)	-62.03	-62.03	-56.45	-56.45		South Shetland Islands	54.06	0.75	19.04	7.51		0.13	4.39	9.33	3.86	0.57	0.06				99.7					84				9		40						22					2				1
P.642.2C	Weavers et al. (1979)	-62.03	-62.03	-56.45	-56.45		South Shetland Islands	54.72	0.6	18.83	6.87		0.13	5.04	9.85	3.49	0.57	0.07				100.17					80				8		67			2.28	1.48	0.61	21	2.16				3				1	6.12
P.642.4	Weavers et al. (1979)	-62.03	-62.03	-56.45	-56.45		South Shetland Islands	53.04	0.58	18.26	7.39		0.13	5.94	10.37	3.11	0.53	0.06				99.41					86				8		87						19					4				1
P.646.1	Weavers et al. (1979)	-62.03	-62.03	-56.45	-56.45		South Shetland Islands	53.96	0.64	18.17	7.38		0.13	5.1	9.5	3.61	0.67	0.07				99.23					101				8		59						20					3				1
P.721.3	Weavers et al. (1979)	-62.06	-62.06	-57.56	-57.56		South Shetland Islands	49.02	1.08	15.81	9.95		0.18	8.95	10.08	3.95	0.48	0.28				99.78					148				20		494			2.84	1.59	1.06	21	3.06				10				2	13.1
P.802.1	Weavers et al. (1979)	-62.06	-62.06	-57.56	-57.56		South Shetland Islands	49.25	1.22	15.34	10.39		0.18	8.84	10.46	3.7	0.47	0.26				100.11					132				19		447						22					7				4
P.807.2	Weavers et al. (1979)	-62.06	-62.06	-57.56	-57.56		South Shetland Islands	49.57	1.19	16.64	9.54		0.17	7.79	10.15	4.18	0.6	0.42				100.25					157				24		306			3.18	1.79	1.25	29	3.45				10				4	15.6
P.808.1	Weavers et al. (1979)	-62.06	-62.06	-57.56	-57.56		South Shetland Islands	49.3	1.22	16.58	9.62		0.18	7.74	10.03	4.13	0.58	0.32				99.7					146				22		307						25					9				4
P.810.4	Weavers et al. (1979)	-62.06	-62.06	-57.56	-57.56		South Shetland Islands	49.28	1.26	17.23	9.81		0.18	6.78	9.71	4.3	0.6	0.3				99.45					173				23		192						26					12				4
P.1957.7A	Willan & Kelley (1999)	-62.58	-62.833	-60	-60.5	Hurd Peninsula	South Shetland Islands	62.31	0.47	16.97	4.23		0.34	1.84	2.93	0.16	4.85	0.25				99.52	5.17				373				54.2	5.3	67	7.85	16			1.41	20			4.65		27.1		0.49		11	28.3
P.1967.2	Willan & Kelley (1999)	-62.58	-62.833	-60	-60.5		South Shetland Islands	45.42	0.91	17.83	9.78		0.15	9.13	7.85	3.06	1.24	0.18				100.3	4.75				292				12.8	37.1	448	1.69	54			0.85	16			1.4		5.9		0.19		1	8.9
P.1984.1	Willan & Kelley (1999)	-62.58	-62.833	-60	-60.5		South Shetland Islands	51.14	1.19	16.83	9.87		0.16	6.69	4.06	4.52	1.81	0.24				99.84	3.33				1079				21.4	30	224		39			1.25	14			2.52		9.3		0.34		1	14.4
P.2058.2	Willan & Kelley (1999)	-62.58	-62.833	-60	-60.5	Hurd Peninsula	South Shetland Islands	44.4	1.12	18.56	9.3		0.14	3.88	9.74	1.77	3.15	0.27				99.87	7.54				775				20.6	25.5	52	0.45	38			0.96	17			2.5		9.6		0.28		7	12.9
P.2060.5	Willan & Kelley (1999)	-62.58	-62.833	-60	-60.5	Johson Dock diorite stock	South Shetland Islands	54.54	1.1	17.53	9.48		0.17	3.96	7.49	3.1	1.21	0.28				100.5	1.64				323				52.3	20.3	20	0.95	31			1.66	19			6.19		24.6		0.49		7	28.8
P.2060.9	Willan & Kelley (1999)	-62.58	-62.833	-60	-60.5	Johnson Dock stock	South Shetland Islands	48.86	0.92	18.13	9.29		0.15	6.97	9.71	2.17	0.86	0.18				100.16	2.92				419				26.2	31.6	135		51			1.28	20			1.9		12.3		0.2		3	17.4
P.2374.3	Willan & Kelley (1999)	-62.58	-62.833	-60	-60.5	Barnard Point pluton	South Shetland Islands	61.7	0.44	17.42	4.67		0.09	2.66	5.42	4.49	1.71	0.15				100.12	1.37				549						18		66				20									3
P.2381.4	Willan & Kelley (1999)	-62.58	-62.833	-60	-60.5		South Shetland Islands	48.15	0.87	15.17	7.68		0.14	11.36	7.96	4.07	1.41	0.18				100.32	3.33				303				25.1	35.3	310	0.2	31			1.23	17			2.37		10.4		0.23		3	16.3
P.2400.4	Willan & Kelley (1999)	-62.58	-62.833	-60	-60.5	Moores Peak	South Shetland Islands	50.27	0.78	17.96	9.61		0.16	6.92	10.6	1.95	0.31	0.11				100.37	1.7				95				12.4	31	96	0.81	101			0.81	19			1.03		6.4		0.2		3	8.4
References
Birkenmajer, K., Francalanci, L. and Peccerillo, A., 1991. Petrological and geochemical constraints on the genesis of Mesozoic–Cenozoic magmatism of King George Island, South Shetland Islands, Antarctica. Antarctic Science, 3(3): 293-308. http://dx.doi.org/10.1017/S0954102091000354 Birkenmajer, K., Narebski, W., Bakun-Czubarow, N. and Kalmus, M., 1985. Geochemistry and petrogenesis of calc-alkali…
+		N = normalized to chondrite composition (Sun and McDonough, 1989)
[truncated: 26 more columns]

## Sheet: S1_2 Geochemistry bibliography
Table S1_2a: Whole rock chemical analyses of Deception Island rock samples - Bibliographic data for Figure 12
	UTM WGS84 20S					wt %																ppm
Sample	x	y	Description	phase	Reference	SiO2	TiO2	Al2O3	Fe2O3	FeO	FeOt	MnO	MgO	CaO	Na2O	K2O	P2O5	H20+-	H20--	Sum	LOI (%)	Ag	As	Au	Be	Bi	Cd	Li	Mo	Pt	Ra	Se	Te	Tl	W	Sb	Sn	Ge	Co	Cs	Ce	Dy	Er	Eu	Gd	Hf	Ho	Lu	La
OG.232	nd.	nd.	Almost aphyric basaltic andesite with olivine; north of Cross Hill	post-caldera	Gonzalez and Katsui 1971	49.72	1.5	17.91	3.04	6.17	8.90539	0.18	6.1	10.64	3.77	0.5	0.33	0.22	0.12	99.5554
OG.229	nd.	nd.	Basaltic andesite with olivine; west coast	nd.	Gonzalez and Katsui 1971	50.18	1.54	17.75	3.56	5.79	8.99329	0.14	6.68	9.19	3.92	0.49	0.34	0.22	0.18	99.2233
OG.356	nd.	nd.	Aphyric basaltic andesite; Macaroni Point	nd.	Gonzalez and Katsui 1971	50.63	1.67	17.59	2.38	6.34	8.48152	0.17	5.56	10.22	4.12	0.44	0.29	0.34	0.14	99.1715
OG.244	nd.	nd.	Basaltic andesite with olivine; Pendulum Cove	nd.	Gonzalez and Katsui 1971	52.42	2.26	16.31	2.72	8.24	10.6875	0.3	3.6	7.64	5.25	0.61	0.48	0.42	0.11	99.5575
OG.354	nd.	nd.	Aphyric andesite; north of Mount Pond	nd.	Gonzalez and Katsui 1971	54.22	1.88	15.61	2.37	7.93	10.0625	0.17	3.63	7.82		0.85	0.27	0.19	0.23	94.5125
OG.226	nd.	nd.	Glassy pyroxene-dacite; Cross Hill	post-caldera	Gonzalez and Katsui 1971	66.21	0.62	15.52	1.02	4.13	5.0478	0.17	0.63	2.4	6.87	1.71	0.21	0.21	0.18	99.3878
Y-10	nd.	nd.	Andesitic bomb from the edge of crater 9; August 12,1970, eruption.	post-caldera	Gonzalez-Ferran et al. 1971	57.53	1.64	17	1.99	5.03	6.8206	0.17	2.2		6.27	1.2				92.8306	0.21
Y13	nd.	nd.	Andesitic bomb from the INACH crater; August 12, 1970,eruption.	post-caldera	Gonzalez-Ferran et al. 1971	56.9	1.8	15.1	1.88	6.59	8.28162	0.04	2.6	7.5	6.4					98.6216	0.18
1969 Fissure	nd.	nd.	1969 Fissure	post-caldera	Baker and McReath 1971	54.9	2.07	16.1	2.98	6.95	9.6314	0.18	3.67	7.25	5.02	0.73	0.29	0.09		99.8414
1967 Island	nd.	nd.	1967 Island	post-caldera	Baker and McReath 1971	61	1.26	15.7	1.19	5.5	6.57076	0.17	1.71	4.11	6.23	1.23	0.42	0.18		98.4008
1967 Land Centre	nd.	nd.	1967 Land Centre	post-caldera	Baker and McReath 1971	57.2	1.89	15.8	2.82	5.67	8.20744	0.18	2.73	5.76	5.58	0.96	0.36	0.23		98.6674
B.701.2 Crater I	nd.	nd.	South side of crater 1.	post-caldera	Baker and McReath 1971	59.3	1.61	15.8	2.24	5.4	7.41555	0.18	2.34	5.06	5.92	1.08	0.41	0.47		99.1156
B.702.1 Crater 2	nd.	nd.	South-west side of crater 2.	post-caldera	Baker and McReath 1971	59.5	1.62	16	2.31	5.33	7.40854	0.17	2.42	5.02	6.17	1.09	0.4	0.49		99.7985
B.704.1 Centre 3	nd.	nd.	South side of crater 3	post-caldera	Baker and McReath 1971	59.5	1.65	16.1	2.59	5.09	7.42048	0.17	2.39	5.17	5.91	1.08	0.42	0.55		99.8105
B.711.1 Crater 5	nd.	nd.	South-east side of crater S.	post-caldera	Baker and McReath 1971	59.3	1.75	15.9	2.89	5.13	7.73042	0.18	2.46	5.26	5.9	1.03	0.41	0.11		99.9204
B.710.1 Cross Hill	nd.	nd.	South side of Cross Hill.	post-caldera	Baker and McReath 1971	58.7	1.6	15.8	2.45	5.18	7.38451	0.17	2.29		5.89	1.09	0.42	0.5		93.3445
B.707.l Land centre	nd.	nd.	100m. west of largest new crater; north of land centre	post-caldera	Baker and McReath 1971	58	1.91	15.9	2.38		2.14152	0.18	2.72	5.73	5.46	0.98	0.37	0.37		93.3915
B.803.4	nd.	nd.	Outer Coast Tuff; 1 km south of the Argentine station.	syn-caldera	Baker et al. 1975	53.98	1.61	16.77	9.17		8.25117	0.16	4.32	7.9	5.08	0.72	0.29			99.0812
B.809.1	nd.	nd.	Outer Coast Tuff; south end of STONETHROW RIDGE.	syn-caldera	Baker et al. 1975	49.92	1.69	18.54	9.61		8.64708	0.16	6.28	8.84	4.16	0.54	0.26			99.0371
B.814.1	nd.	nd.	Pyroclast flow; Fumarole Bay.	nd.	Baker et al. 1975	51.33	1.47	18.57	8.67		7.80127	0.15	5.39	10	3.6	0.59	0.23			99.1313
B.825.1	nd.	nd.	Pyroclast flow; between Cathedral Crags and South East Point.	nd.	Baker et al. 1975	53.81	1.76	16.42	9.98		8.98	0.17	4.4	8.34	4.13	0.79	0.29			99.09
B.802.1	nd.	nd.	Tuff; 0.5 km. south of the Argentine station.	nd.	Baker et al. 1975	53.18	1.83	16.87	9.88		8.89002	0.17	4.56	8.12	4.4	0.7	0.29			99.01
B.556.l	nd.	nd.	South end of fissure	post-caldera	Baker et al. 1975	56.2	1.97	15.9	9.77		8.79105	0.17	3.12	6.47	5.36	0.85	0.34			99.171
B.561.1	nd.	nd.	0.5 km distance from the south end of fissure	post-caldera	Baker et al. 1975	55	1.95	15.6	9.7		8.72806	0.17	3.2	6.46	5.25	0.84	0.35			97.5481
B.567.1	nd.	nd.	1 km distance from the south end of fissure	post-caldera	Baker et al. 1975	55.4	2.03	15.8	10.2		9.17796	0.17	3.45	6.94	5.94	0.77	0.29			99.968
B.568.3	nd.	nd.	1.3 km distance from the south end of fissure	post-caldera	Baker et al. 1975	55.1	2.04	16	10.2		9.17796	0.17	3.66	7.3	5.01	0.75	0.28			99.488
B.571.1	nd.	nd.	3 km distance from the south end of fissure	post-caldera	Baker et al. 1975	54.9	2.07	16.1	10.7		9.62786	0.17	3.67	7.25	5.02	0.73	0.29			99.8279
B.571.1*	nd.	nd.	3 km distance from the south end of fissure	post-caldera	Baker et al. 1975	54.8	1.95	16.83	2.34	7.39	9.49553	0.17	3.31	7.27	4.83	0.65	0.3	0.11	0.06	99.6055
B.560	nd.	nd.	4.4 km distance from the south end of fissure	post-caldera	Baker et al. 1975	59.1	1.73	16	8.25		7.42335	0.18	2.3	5.23	5.72	1.04	0.41			99.1334
B.701.2	nd.	nd.	South side of crater 1.	post-caldera	Baker et al. 1975	59.3	1.61	15.8	2.24	5.4	7.41555	0.18	2.34	5.06	5.92	1.08	0.41	0.47		99.1156
B.702.1	nd.	nd.	South-west side of crater 2.	post-caldera	Baker et al. 1975	59.5	1.62	16	2.31	5.33	7.40854	0.17	2.42	5.02	6.17	1.09	0.4	0.49		99.7985
B.704.1	nd.	nd.	South side of crater 3	post-caldera	Baker et al. 1975	59.5	1.65	16.1	2.59	5.09	7.42048	0.17	2.39	5.17	5.91	1.08	0.42	0.55		99.8105
B.711.1	nd.	nd.	South-east side of crater S.	post-caldera	Baker et al. 1975	59.3	1.75	15.9	2.89	5.13	7.73042	0.18	2.46	5.26	5.9	1.03	0.41	0.11		99.9204
B.710.1	nd.	nd.	South side of Cross Hill.	post-caldera	Baker et al. 1975	58.7	1.6	15.8	2.45	5.18	7.38451	0.17	2.29		5.89	1.09	0.42	0.5		93.3445
B.707.l	nd.	nd.	100 m west of largest new crater; north of land centre	post-caldera	Baker et al. 1975	58	1.91	15.9	2.38			0.18	2.72	5.73	5.46	0.98	0.37	0.37		91.25
1048	nd.	nd.	nd.	nd.	Keller et al. 1992	50.9	1.58	17.3		8.4	8.4	0.15	6.1	10.3	4.1	0.47	0.25			99.55
1049	nd.	nd.	nd.	nd.	Keller et al. 1992	52.7	2.09	15.9		9.5	9.5	0.18	4.3	8.5	4.8	0.59	0.37			98.93
1050	nd.	nd.	nd.	nd.	Keller et al. 1992	60	1.68	16		7.7	7.7	0.17	2.3	5.3	6.1	1.04	0.41			100.7
1051	nd.	nd.	nd.	nd.	Keller et al. 1992	51.6	2.44	15.2		11	11	0.19	4.9	9.1	4.7	0.5	0.36			99.99
1055	nd.	nd.	nd.	nd.	Keller et al. 1992	68.9	0.6	14.5		4.3	4.3	0.15	0.3	1.8	7.2	1.89	0.12			99.76
1057	nd.	nd.	nd.	nd.	Keller et al. 1992	69.2	0.59	14.8		4.4	4.4	0.15	0.3	1.8	7.3	1.9	0.12			100.56
1060	nd.	nd.	nd.	nd.	Keller et al. 1992	57.8	1.86	15.6		8.6	8.6	0.17	2.6		5.9	0.96	0.37			93.86
1063	nd.	nd.	nd.	nd.	Keller et al. 1992	52.8	2.31	15.4		10.8	10.8	0.19	4.3	8.6	4.9	0.53	0.53			100.36
1065	nd.	nd.	nd.	nd.	Keller et al. 1992	52.3	2.31	15.2		10.6	10.6	0.19	4.4	8.6	4.6	0.54	0.34			99.08
1066	nd.	nd.	nd.	nd.	Keller et al. 1992	59.9	1.6	15.8		7.3	7.3	0.17	2.1	5.1	6.2	1.08	0.44			99.69
1067	nd.	nd.	nd.	nd.	Keller et al. 1992	61.7	1.29	15.8		6.7	6.7	0.17	1.6	4.3	6.6	1.22	0.45			99.83
1075	nd.	nd.	nd.	nd.	Keller et al. 1992	63.9	1.12	15.6		6.7	6.7	0.17	1.2	3.6	6.7	1.43	0.42			100.84
1079	nd.	nd.	nd.	nd.	Keller et al. 1992	69	0.63	14.8		4.5	4.5	0.15	0.4	1.9	7.3	1.88	0.13			100.69
1081	nd.	nd.	nd.	nd.	Keller et al. 1992	54.2	1.81	16.3		9.2	9.2	0.17	4.7	8.8	4.8	0.57	0.29			100.84
1082	nd.	nd.	nd.	nd.	Keller et al. 1992	53.8	1.82	16.2				0.17	4.6	8.9	4.4	0.51	0.29			90.69
1084	nd.	nd.	nd.	nd.	Keller et al. 1992	56.7	1.85	15.1		8.9	8.9	0.17	3.1	6.6	5.4	0.87	0.31			99
1085	nd.	nd.	nd.	nd.	Keller et al. 1992	56.4	1.82	15.6		8.6	8.6	0.17	3.1	6.6	5.1	0.91	0.32			98.62
1087	nd.	nd.	nd.	nd.	Keller et al. 1992	53.7	1.82	16.2		8.8	8.8	0.17	4.6	8.9	4.6	0.55	0.29			99.63
1088	nd.	nd.	nd.	nd.	Keller et al. 1992	59.7	1.28	15.5				0.13	4.2	8.3	3.9	0.53	0.21			93.75
1092	nd.	nd.	nd.	nd.	Keller et al. 1992	54.2	1.59	16.9				0.16	4.7	9.3	4.5	0.51	0.24			92.1
B. 751.5a	nd.	nd.	nd.	pre-caldera	Smellie et al. 2002	51.95	1.52	16.84	9.46		8.51211	0.16	6.07	9.82	3.92	0.35	0.2			99.3421	-0.16																				29								2
B.751.6b	nd.	nd.	nd.	pre-caldera	Smellie et al. 2002	52.72	2.05	15.56	10.83		9.74483	0.18	4.97	8.81	4.63	0.5	0.28			99.4448	-0.52																				32								4
B.791.2	nd.	nd.	nd.	pre-caldera	Smellie et al. 2002	53.46	2.3	15.17	11.84		10.6536	0.19	3.88	7.53	4.96	0.62	0.37			99.1336	-0.1																				29								2
B.791.5	nd.	nd.	nd.	pre-caldera	Smellie et al. 2002	53.75	2.34	14.98	11.91		10.7166	0.2	3.64	7.16		0.69	0.39			93.8666	-0.14																				34								2
B.791.7	nd.	nd.	nd.	pre-caldera	Smellie et al. 2002	52.57	2.24	15.42	11.9		10.7076	0.19	4.49	8.2		0.54	0.33			94.6876	-0.29																				16								6
B.791.1	nd.	nd.	nd.	pre-caldera	Smellie et al. 2002	54.67	2.05	16	10.33		9.29493	0.18	3.53	7.03	5.12	0.74	0.33			98.9449	0.06																				31								2
B.753.13	nd.	nd.	Fumarole Bay	pre-caldera	Smellie et al. 2002	52.11	2.3	15.66	11.26		10.1317	0.18	4.65	8.49	4.3	0.62	0.35			98.7917	nd.																				31								0
B.760.38	nd.	nd.	Fumarole Bay	pre-caldera	Smellie et al. 2002	50.92	1.92	16.17	10.28		9.24994	0.17	5.58	9.54	4.31	0.47	0.26			98.5899	0.38																				33								0
B.786.6	nd.	nd.	Fumarole Bay	pre-caldera	Smellie et al. 2002	51.56	2.23	15.85	11.13		10.0148	0.18	4.83	9.03	4.4	0.59	0.35			99.0348	0.09																				36								5
B.793.9	nd.	nd.	Fumarole Bay	pre-caldera	Smellie et al. 2002	53.12	2.42	15.67	11.55		10.3927	0.18	3.86	7.22	5.089	0.57	0.38			98.9017	-0.03																				33								3
B.867.3	nd.	nd.	Fumarole Bay	pre-caldera	Smellie et al. 2002	51.62	2.4	15.73	12.13		10.9146	0.19	4.39	8.62	4.63	0.45	0.3			99.2446	-0.11																				2								6
B.751.2	nd.	nd.	Outer Coast Tuff	syn-caldera	Smellie et al. 2002	51.69	1.73	17.04	9.7		8.72806	0.16	5.74	9.65	4.1	0.44	0.25			99.5281	-0.05																				30								3
B.751.3	nd.	nd.	Outer Coast Tuff	syn-caldera	Smellie et al. 2002	51.75	2.51	15.27	12.39		11.1485	0.19	4.21	8.07	4.92	0.51	0.35			98.9285	-0.33																				60								8
B.789.9	nd.	nd.	Outer Coast Tuff	syn-caldera	Smellie et al. 2002	56.05	1.46	16.42	8.21		7.38736	0.16	4.06	6.99	5.12	0.88	0.25			98.7774	0.72																				30								3
B.789.11	nd.	nd.	Outer Coast Tuff	syn-caldera	Smellie et al. 2002	53.893	1.26	18.32	7.41		6.66752	0.13	5.09	9.19	4.18	0.61	0.2			99.5405	-0.15																				32								14
B.793.3	nd.	nd.	Outer Coast Tuff	syn-caldera	Smellie et al. 2002	56.17	1.46	16.82	8.44		7.59431	0.16	4.04	7.52	4.97	0.87	0.25			99.8543	-0.17																				29								8
B.822.7	nd.	nd.	Outer Coast Tuff	syn-caldera	Smellie et al. 2002	54.41	1.47	17.42	8.65		7.78327	0.15	4.41	8.53	4.7	0.61	0.21			99.6933	-0.25																				41								13
B.823.2	nd.	nd.	Outer Coast Tuff	syn-caldera	Smellie et al. 2002	56.68	1.37	16.82	7.89		7.09942	0.15	3.62	7.15	5.26	0.86	0.22			99.2294	-0.02																				17								2
B.837.5	nd.	nd.	Outer Coast Tuff	syn-caldera	Smellie et al. 2002	48.76	0.7	21.57	6.09		5.47978	0.09	8.19	12.43	2.37	0.22	0.08			99.8898	0.02																				105								33
B.839.1	nd.	nd.	Outer Coast Tuff	syn-caldera	Smellie et al. 2002	66.07	0.52	13.94	4.26		3.83315	0.16	0.34	1.17	7.08	2.23	0.06			95.4031	4.16																				85								27
B.848.6	nd.	nd.	Outer Coast Tuff	syn-caldera	Smellie et al. 2002	66.12	0.52	14.32	4.32		3.88714	0.16	0.35	1.54	7.12	2.15	0.07			96.2371	3.71																				36								8
B.858.6	nd.	nd.	Outer Coast Tuff	syn-caldera	Smellie et al. 2002	53.25	1.71	16.88	9.58		8.62008	0.16	4.36	8.09	4.47	0.55	0.22			98.3101	0.74																				33								3
B.859.3	nd.	nd.	Outer Coast Tuff	syn-caldera	Smellie et al. 2002	49.98	1.72	18.17	9.65		8.68307	0.16	6.34	10.01	3.83	0.47	0.25			99.6131	-0.3																				25								5
B.863.1	nd.	nd.	Outer Coast Tuff	syn-caldera	Smellie et al. 2002	54.67	1.48	17.08	8.66		7.79227	0.15	4.34	8.25	4.86	0.58	0.22			99.4223	-0.22																				79								14
B.868.1	nd.	nd.	Outer Coast Tuff	syn-caldera	Smellie et al. 2002	55.16	1.43	16.92	8.42		7.57632	0.16	4.03	7.85	4.86	0.72	0.22			98.9263	0.12																				17								7
B.775.4b	nd.	nd.	Kirkwood	post-caldera	Smellie et al. 2002	55.13	2.06	15.91	10.73		9.65485	0.18	3.56		5.17	0.77	0.31			92.7449	-0.48																				42								6
B.797.1	nd.	nd.	Kirkwood	post-caldera	Smellie et al. 2002	55.59	1.99	16.2	10.28		9.24994	0.17	3.44	7.09	5.23	0.77	0.32			100.05	-0.41																				37								7
B.797.4	nd.	nd.	Kirkwood	post-caldera	Smellie et al. 2002	58.69	1.69	15.97	8.54		7.68429	0.17	2.48	5.39	5.86	1.05	0.43			99.4143	-0.19																				32								7
B.799.9	nd.	nd.	Kirkwood	post-caldera	Smellie et al. 2002	54.85	2.04	15.93	10.61		9.54688	0.18	3.61	7.27	5.23	0.78	0.3			99.7369	-0.33																				27								0
B.753.4	nd.	nd.	Kendall Terrace	post-caldera	Smellie et al. 2002	50.17	1.61	17.73	9.42		8.47612	0.15	6.47	10.26	3.73	0.44	0.25			99.2861	-0.33																				35								13
B.753.6	nd.	nd.	Kendall Terrace	post-caldera	Smellie et al. 2002	54.9	1.95	16.18	10.04		9.03399	0.18	3.54	7.06	5.2	0.79	0.34			99.174	-0.46																				35								4
B.753.9	nd.	nd.	Kendall Terrace	post-caldera	Smellie et al. 2002	53.39	2.26	16.06	10.97		9.87081	0.19	3.82	7.44	5.19	0.69	0.36			99.2708	-0.37																				21								0
B.791.14	nd.	nd.	Kendall Terrace	post-caldera	Smellie et al. 2002	50.34	1.65	17.54	9.41		8.46712	0.15	6.3	10.12	3.92	0.46	0.27			99.2171	-0.22																				13								0
B.773.1	nd.	nd.	Kendall Terrace	post-caldera	Smellie et al. 2002	52.82	1.99	16.74	10.58		9.51988	0.17	4.48	8.63	4.73	0.6	0.32			99.9999	-0.39																				40								10
B.773.2	nd.	nd.	Kendall Terrace	post-caldera	Smellie et al. 2002	55.33	2.33	15.43	10.9		9.80782	0.17	3.33	6.85	5.24	0.84	0.43			99.7578	-0.39																				31								6
B.783.2	nd.	nd.	Baily Head	post-caldera	Smellie et al. 2002	54.57	2.17	15.92	10.75		9.67285	0.18	3.83	7.43	5.02	0.71	0.37			99.8728	-0.5																				18								2
B.792.1	nd.	nd.	Baily Head	post-caldera	Smellie et al. 2002	52.83	1.82	16.56	10		8.998	0.17	4.95	8.83	4.44	0.54	0.28			99.418	-0.11																				30								5
B.793.6	nd.	nd.	Baily Head	post-caldera	Smellie et al. 2002	52	1.62	16.59	9.41		8.46712	0.16	4.64	8.53	4.41	0.54	0.3			97.2571	1.53																				29								3
B.855.2	nd.	nd.	Baily Head	post-caldera	Smellie et al. 2002	53.33	1.6	17.19	9.31		8.37714	0.15	4.46	8.81	4.57	0.5	0.24			99.2271	0.08																				27								9
B.843.3	nd.	nd.	Baily Head	post-caldera	Smellie et al. 2002	50.77	2.32	15.31	11.74		10.5637	0.19	4.41	8.19	4.81	0.64	0.35			97.5537	nd.																				48								12
B.767.1	nd.	nd.	Telefon Bay	post-caldera	Smellie et al. 2002	59.59	1.6	16.07	8.27		7.44135	0.17	2.34	5.13	6.02	1.07	0.44			99.8713	-0.32																				50								6
B.770.2	nd.	nd.	Telefon Bay	post-caldera	Smellie et al. 2002	58.75	1.76	16.01	8.73		7.85525	0.17	2.47	5.44	5.98	1.02	0.42			99.8753	-0.36																				43								6
B.856.1	nd.	nd.	Telefon Bay	post-caldera	Smellie et al. 2002	57.85	1.89	16.13	9.06		8.15219	0.17	2.67	5.73	5.86	0.97	0.36			99.7822	-0.28																				52								17
B.856.4	nd.	nd.	Telefon Bay	post-caldera	Smellie et al. 2002	57.7	1.92	16.09	8.67		7.80127	0.16	2.68	5.68	5.66	0.93	0.37			98.9913	-0.35																				54								8
B.768.2b	nd.	nd.	Telefon Bay	post-caldera	Smellie et al. 2002	61.13	1.36	16.02	7.65		6.88347	0.17	1.91	4.44	6.38	1.19	0.47			99.9535	-0.21																				32								6
B.782.2	nd.	nd.	Telefon Bay	post-caldera	Smellie et al. 2002	56.17	2.04	15.84	10.07		9.06099	0.17	3.23	6.61	5.47	0.84	0.35			99.781	-0.38																				52								16
B.856.3	nd.	nd.	Telefon Bay	post-caldera	Smellie et al. 2002	57.55	1.91	16.08	9.1		8.18818	0.17	2.74	5.78	5.75	0.94	0.36			99.4682	-0.38																				16								0
B.785.2	nd.	nd.	Vapour Col	post-caldera	Smellie et al. 2002	52.85	1.79	16.67	9.9		8.90802	0.16	3.54	9.26	4.41	0.5	0.27			98.358	-0.46																				13								5
B.789.17	nd.	nd.	Vapour Col	post-caldera	Smellie et al. 2002	52.53	1.8	16.48	9.96		8.96201	0.16	4.88	9.08	4.49	0.53	0.27			99.182	-0.43																				31								2
B.799.3	nd.	nd.	Vapour Col	post-caldera	Smellie et al. 2002	53.75	2.48	15.39	11.28		10.1497	0.19	5.05	7.18	5.5	0.68	0.45			100.82	-0.47																				34								8
B.799.5	nd.	nd.	Crater Lake	post-caldera	Smellie et al. 2002	55.75	1.86	15.83	9.81		8.82704	0.17	3.33	6.76	5.37	0.87	0.33			99.097	-0.48																				30								3
B.799.1	nd.	nd.	Crater Lake	post-caldera	Smellie et al. 2002	56.23	1.93	15.95	9.96		8.96201	0.17	3.3	6.66	5.37	0.87	0.34			99.782	-0.46																				41								14
B.800.7	nd.	nd.	Crater Lake	post-caldera	Smellie et al. 2002	56.13	1.93	15.75	9.91		8.91702	0.17	3.22	6.5	5.52	0.93	0.33			99.397	-0.36																				48								2
B.801.1	nd.	nd.	Crater Lake	post-caldera	Smellie et al. 2002	55.82	1.91	15.66	9.95		8.95301	0.17	3.25	6.43	5.36	0.94	0.33			98.823	-0.3																				66								16
B.795.8	nd.	nd.	Collins Point	post-caldera	Smellie et al. 2002	61.61	1.27	15.49	7.77		6.99145	0.18	1.71	4.13	6.37	1.35	0.41			99.5114	-0.25																				29								3
B.795.1	nd.	nd.	Collins Point	post-caldera	Smellie et al. 2002	53		16	11		9.8978	0.2	4.3	8.3	4.8	0.6	0.3			97.3978																					13								4
B.795.12	nd.	nd.	Collins Point	post-caldera	Smellie et al. 2002	53.71	2.34	15.28	11.6		10.4377	0.19	3.68	7.37	5.18	0.67	0.41			99.2677	-0.18																				46								9
B.809.5	nd.	nd.	Kroner Lake	post-caldera	Smellie et al. 2002	57.9	1.83	15.77	9.19		8.26916	0.17	2.65	5.54	5.78	1.03	0.38			99.3192	-0.4																				52								11
B.841.2	nd.	nd.	Kroner Lake	post-caldera	Smellie et al. 2002	57.29	1.91	15.99	9.46		8.51211	0.17	2.83	5.97	5.45	0.92	0.34			99.3821	-0.34																				44								10
B.766.1	nd.	nd.	Cross Hill	post-caldera	Smellie et al. 2002	55.98	1.86	15.83	9.72		8.74606	0.17	3.25	6.6	5.46	0.91	0.33			99.1361	-0.4																				6								4
B.780.13	nd.	nd.	Cross Hill	post-caldera	Smellie et al. 2002	52.18	1.83	16.51	10.11		9.09698	0.16	5.2	9.35	4.49	0.48	0.28			99.577	-0.41																				19								4
B.764.1	nd.	nd.	Cross Hill	post-caldera	Smellie et al. 2002	53	2.3	15	12		10.7976	0.2	4.1	7.8	5.1	0.6	0.4			99.2976	nd.																				45								6
B.763.2	nd.	nd.	Cross Hill	post-caldera	Smellie et al. 2002	54.8	1.99	16.04	10.26		9.23195	0.17	3.91	7.64	4.9	0.74	0.35			99.7719	-0.31																				27								11
B.763.4	nd.	nd.	Cross Hill	post-caldera	Smellie et al. 2002	54.31	1.95	15.97	10.1		9.08798	0.17	3.98	7.71	4.81	0.73	0.34			99.058	0.14				2											1.8	1	1	25		28	5.3	3.3	1.58	5.3	4.2	1.1	0.43	11
DI-01A	616584	3014628	nd.	post-caldera	Kraus et al. 2013	53.8423	1.90285	16.7873		9.29777	9.29777	0.175631	4.59012	8.50141	3.9544	0.614171	0.334023			100					2											2.4	1	1	25		28.3	5.4	3.4	1.59	5.4	4.3	1.1	0.44	11.1
DI-01B	616614	3014598	nd.	post-caldera	Kraus et al. 2013	53.581	1.86129	16.7441		9.06894	9.06894	0.1642	4.80717	8.73932	3.92135	0.788591	0.324079			100					2											2.6	1	1	26		28.8	5.5	3.6	1.68	5.5	4.5	1.2	0.47	11.3
DI-02	616622	3014430	nd.	post-caldera	Kraus et al. 2013	53.5499	1.87282	16.6728		9.19808	9.19808	0.163995	4.70119	8.64801	4.26387	0.601315	0.32799			100					2											2.6	2	2	31		28.6	5.5	3.5	1.68	5.5	4.1	1.2	0.46	11.3
DI-04A	616408	3014007	nd.	post-caldera	Kraus et al. 2013	53.3289	1.86404	16.655		9.2009	9.2009	0.166653	4.93786	9.03218	3.91943	0.576084	0.318904			100					2											1.6	1	1	32		24.4	4.4	2.8	1.4	4.5	3.4	0.9	0.37	9.8
DI-04B	616408	3014007	nd.	nd.	Kraus et al. 2013	51.1018	1.60032	18.0914		8.67233	8.67233	0.153607	5.84308	10.1099	3.76487	0.401586	0.261031			100					2											2.1	1	1	26		27.3	5.2	3.3	1.6	5.2	4.1	1.1	0.43	10.9
DI-05A	616426	3014091	nd.	post-caldera	Kraus et al. 2013	54.2547	1.89428	17.0016		9.25341	9.25341	0.169035	4.27494	8.65894	3.51156	0.719761	0.261731			100					2											2.3	1	2	28		28.6	5.4	3.4	1.64	5.3	4.3	1.1	0.45	11.2
DI-05B	616426	3014091	nd.	post-caldera	Kraus et al. 2013	53.8105	1.80654	16.949		9.15042	9.15042	0.16746	4.25247	8.70792	4.30321	0.5582	0.294324			100					2										38			1	34		25	5.1	3.2	1.52	4.7	4	1.1	0.41	11
DI-06	616423	3014104	nd.	post-caldera	Kraus et al. 2013	52.5408	1.8573	16.6661		9.47076	9.47076	0.170216	5.07417	9.37267	4.02917	0.517113	0.301649			100					2										57		16	2	35		27.7	5.2	3.2	1.6	4.9	4.1	1.1	0.46	11.5
DI-07	616452	3014142	nd.	nd.	Kraus et al. 2013	53.6091	1.81886	16.4519		9.17027	9.17027	0.168471	4.82534	8.87072	4.26377	0.530371	0.291184			100			17		2										34			1	26		27	5.1	3.1	1.5	4.6	4.4	1	0.47	11.2
DI-08A	616546	3014181	nd.	syn-caldera	Kraus et al. 2013	55.3801	1.69496	16.6332		7.89	7.89	0.163847	4.599	6.59906	6.13577	0.644086	0.259895			100					2											1.4	2	1	25		36.7	7.6	4.8	2.15	7.5	6	1.6	0.64	14
DI-08B	616546	3014181	nd.	nd.	Kraus et al. 2013	54.9269	2.41658	15.7093		10.3579	10.3579	0.192193	3.13579	6.86839	5.20945	0.79912	0.384387			100					2									0.1		2.6	1	1	23	0.5	27.4	5.2	3.4	1.53	5.3	4.5	1.1	0.46	10.8
DI-09A	616518	3014207	nd.	syn-caldera	Kraus et al. 2013	55.3923	1.74001	17.0541		8.38566	8.38566	0.161835	3.92869	6.84172	5.53588	0.669663	0.290187			100					2											1.8	1	2	30		20.6	5.1	3.2	1.5	5.1	3.6	1.1	0.42	7.7
DI-09B	616518	3014207	nd.	nd.	Kraus et al. 2013	52.376	1.63162	16.7574		8.30094	8.30094	0.133403	5.61318	10.703	3.90973	0.359161	0.215497			100					2											3.5		1	32		23.9	4.3	2.8	1.42	4.4	3.3	0.9	0.37	9.7
DI-10	616628	3014371	nd.	nd.	Kraus et al. 2013	50.649	1.51076	17.9124		8.35492	8.35492	0.146823	6.47035	10.6118	3.6959	0.394904	0.253144			100		2.9			2				3							1.1	2	1	33	0.5	34.1	6.8	4.3	2.09	6.9	4.8	1.4	0.55	13.2
DI-11	616641	3014552	nd.	post-caldera	Kraus et al. 2013	53.1218	2.60315	15.493		10.8397	10.8397	0.19179	4.0156	8.07115	4.66489	0.559387	0.439518			100			8		3				3					0.3	1	2.8	4	2	2	1.7	59.1	10.1	6.7	2.16	9.2	10.3	2.1	1.01	24.6
DI-12B	616825	3018516	nd.	post-caldera	Kraus et al. 2013	68.6716	0.761312	14.7248		4.34588	4.34588	0.148374	0.736753	2.04654	6.54892	1.83165	0.184188			100					1										2	1.7	1	1	28	0.8	24.1	4.7	3	1.46	4.8	3.3	1	0.37	9.5
DI-13A	616909	3019484	nd.	post-caldera	Kraus et al. 2013	53.695	1.82909	16.1085		8.89407	8.89407	0.177829	6.88219	4.03001	6.48959	1.60508	0.288683			100		0.5	6.5		3				2.5					0.35	1	2.8	4	2	2.5	1.7	61.7	9.75	6.75	2.115	8.95	11.95	2.15	0.985	25.2
DI-13B	616909	3019484	nd.	post-caldera	Kraus et al. 2013	68.0861	0.754439	15.1039		4.17471	4.17471	0.145744	0.640466	1.80541	7.30232	1.80036	0.186592			100		0.9			2				2								1	1	31		24.5	4.6	2.9	1.44	4.4	3.6	1	0.37	9.9
DI-13C	616909	3019484	nd.	post-caldera	Kraus et al. 2013	50.572	1.64994	17.6034		8.66025	8.66025	0.157567	6.23243	10.558	3.8338	0.461662	0.270975			100					2										39	0.6		1	34		24.2	5.3	3.3	1.5	4.8	3.8	1.1	0.43	10.9
DI-14	623982	3013052	nd.	syn-caldera	Kraus et al. 2013	53.3642	2.01394	16.5536		10.1768	10.1768	0.185758	5.5257	7.72423	3.35069	0.799463	0.305677			100					2										26			1	29		22	4.7	2.8	1.39	4.3	3.5	1	0.4	8.8
DI-15A	623870	3012987	nd.	pre-caldera	Kraus et al. 2013	52.945	1.99867	16.076		9.90693	9.90693	0.181697	5.114	8.44713	4.47626	0.553516	0.300824			100					2										56	0.9		1	51		25.8	5.6	3.5	1.67	5.3	3.8	1.2	0.45	10.5
DI-15B	623870	3012987	nd.	pre-caldera	Kraus et al. 2013	52.5288	2.03595	16.0523		10.3448	10.3448	0.179198	5.05209	8.7656	4.27485	0.442598	0.323852			100					1											1.9	1	1	32		26.7	4.9	3.1	1.53	5	3.6	1	0.4	10.6
DI-16A	615832	3017759	nd.	post-caldera	Kraus et al. 2013	52.3309	1.72097	16.767		8.76269	8.76269	0.164108	5.38748	10.03	4.03791	0.496641	0.302303			100			12		2										182			1	44	0.5	38.1	7.4	4.4	2.07	6.7	5.7	1.5	0.66	15.4
DI-16B	615832	3017759	nd.	nd.	Kraus et al. 2013	56.5977	2.35089	15.7227		8.58394	8.58394	0.190396	3.367	6.70394	5.18077	0.911896	0.390813			100		4			2				3							3.8	2	2	29		36.1	6.3	4	1.88	6.3	5.3	1.3	0.53	14.4
DI-17	615784	3017715	nd.	pre-caldera	Kraus et al. 2013	55.0962	1.88924	16.4151		8.96184	8.96184	0.175228	4.01817	7.8752	4.59219	0.654589	0.322259			100		2.4	7		2				14						1	4.5	2	2	33	0.8	43.8	6.9	4.4	2.04	6.9	5.9	1.4	0.59	17.7
DI-18	615474	3016858	nd.	post-caldera	Kraus et al. 2013	55.6951	1.86905	16.0859		8.93528	8.93528	0.29099	3.48985	7.25441	5.07707	0.946227	0.356107			100																2.1		1	26		16.2	2.8	1.8	1	2.9	2.3	0.6	0.24	6.6
DI-19	615732	3016564	nd.	pre-caldera	Kraus et al. 2013	51.2543	1.18784	19.43		6.94259	6.94259	0.125468	6.71899	10.7879	3.01358	0.328328	0.211068			100					2										115	0.6		1	42	0.7	33.9	6.7	4.1	1.91	6.3	5.2	1.4	0.54	14.6
DI-20A	615731	3016556	nd.	nd.	Kraus et al. 2013	53.0454	2.41982	15.5108		11.32	11.32	0.194662	4.27636	8.36633	3.82076	0.652325	0.393466			100			14		2										76	7.9	2	1	32		32.1	6.1	3.6	1.78	5.6	4.4	1.2	0.51	13.1
DI-20B	615731	3016556	nd.	nd.	Kraus et al. 2013	54.3982	2.59765	16.1003		9.54377	9.54377	0.211707	4.09654	8.12957	3.91659	0.698635	0.306976			100					1											1.7		1	28		20.6	3.6	2.3	1.15	3.7	2.8	0.8	0.3	8.4
DI-21	615693	3016516	nd.	pre-caldera	Kraus et al. 2013	53.7062	1.21135	17.5276		7.34844	7.34844	0.138642	6.25409	10.1199	3.13716	0.333956	0.222637			100		0.7			2				3						3	2.3	1	2	33		30.5	5.6	3.4	1.7	5.5	4.1	1.1	0.44	12.3
DI-22B	617681	3014905	nd.	post-caldera	Kraus et al. 2013	53.7145	1.80482	16.4307		8.88902	8.88902	0.160724	4.88314	9.1111	4.16654	0.542571	0.296878			100					2											2	2	1	26	0.6	33.6	6.2	4	1.78	6	5.3	1.3	0.51	13.7
DI-23	617642	3014855	nd.	post-caldera	Kraus et al. 2013	55.8475	2.07439	15.7206		9.59831	9.59831	0.17812	3.61243	7.35494	4.49302	0.770517	0.350235			100																			23		23.32	6.25	3.7	1.58	5.22	4.78	1.3	0.54	12.52
DE-32	nd.	nd.	1842 Eruption	post-caldera	De Rosa et al. 1995	54.32	2.05	16.48	3.41	6.49	9.55832	0.18	4.01	6.99	5.2	0.67	0.21			99.6683																					5								10
DE-13	nd.	nd.	1842 Eruption	post-caldera	De Rosa et al. 1995	52.52	1.69	17.46	1.43	8.11	9.39671	0.16	4.46	8.64	4.78	0.48	0.26			99.8467																					36								13
DE-33	nd.	nd.	1842 Eruption	post-caldera	De Rosa et al. 1995	53.02	1.94	16.17	2.98	6.34	9.0214	0.17	6.91	6.55	5.08	0.65	0.2			99.7114																					26								10
DE-46	nd.	nd.	1842 Eruption	post-caldera	De Rosa et al. 1995	51.26	2.34	16.46	3.75	6.33	9.70425	0.19	6.05	7.92	4.98	0.48	0.24			99.6243																					26								10
DE-87	nd.	nd.	1842 Eruption	post-caldera	De Rosa et al. 1995	51.74	1.68	17.4	2.48	6.1	8.3315	0.16	6.72	8.4	4.67	0.46	0.19			99.7515																					37								14
DE-57	nd.	nd.	1842 Eruption	post-caldera	De Rosa et al. 1995	54.32	2.23	16.02	4.19	5.69	9.46016	0.18	4.44	6.56	5.37	0.7	0.3			99.5802																					43								19
DE-56	nd.	nd.	1967 Eruption	post-caldera	De Rosa et al. 1995	58.49	1.85	16.08	2.09	6.35	8.23058	0.18	2.24	5.48	6.01	0.92	0.3			99.7806																					49								18
DE-86	nd.	nd.	1967 Eruption	post-caldera	De Rosa et al. 1995	59.15	1.7	15.83	2.93	5.53	8.16641	0.19	2.04	4.92	6.39	0.99	0.32			99.6964																					21								11
DE-6	nd.	nd.	1969 Eruption	post-caldera	De Rosa et al. 1995	53.25	1.55	17.28	4.75	4.09	8.36405	0.16	4.94	8.79	4.51	0.5	0.18			99.5241																					23								12
DE-6**	nd.	nd.	1969 Eruption	post-caldera	De Rosa et al. 1995	53.51	1.6	17.41	4.5	4.18	8.2291	0.16	4.72	8.61	4.63	0.49	0.19			99.5491																					39								16
DE-23	nd.	nd.	1970 Eruption	post-caldera	De Rosa et al. 1995	55.91	2.18	16.41	2.14	7.69	9.61557	0.28	2.39	6.68	5.32	0.76	0.24			99.7856																					45								18
DE-64	nd.	nd.	1970 Eruption	post-caldera	De Rosa et al. 1995	58.68	1.76	16.2	2.74	5.35	7.81545	0.18	2.93	5.03	5.93	0.92	0.29			99.7355																					30								17
DE-30	nd.	nd.	1970 Eruption	post-caldera	De Rosa et al. 1995	57.47	2.04	16.19	2.72	6.49	8.93746	0.24	2.35	5.89	5.43	0.87	0.29			99.7075
References
Baker, P. E., & McReath, I. (1971). 1970 Volcanic Eruption at Deception Island. Nature Physical Science, 231(3), 5–9. https://doi.org/10.1038/physci231005a0 Baker, P. E., McReath, I., Harvey, M. R., Roobol, M. J. &, & Davies, T. G. (1975). The geology of the south Shetland islands: Volcanic evolution of Deception island. British Antarctic Survey Scientific Reports, 78, 81 pp. De Rosa, R., Mazzuol…
+		N = normalized to chondrite composition (Sun and McDonough, 1989)
Table S1_2b: Whole rock chemical analyses of Deception Island of the rock samples collected by the Spanish RECALDEC and POSVOLDEC projects. Data for Figure 12 (continuation)
		UTM WGS84 20S					wt % estimated with X-ray Fluorescence														ppm estimated with * inductively coupled plasma mass spectrometry (ICP-MS) or ^X-Ray fluorescence
IGSN	Sample	x	y	phase	Project	Data first published in:	SiO2	TiO2	Al2O3	FeOt	MnO	MgO	CaO	Na2O	K2O	P2O5	Sum	LOI (%)			Ba*	Cr^	Cs*	Cu^	Ga^	Hf*	Nb^	Ni^	Pb *	Rb *	Ta *	Th *	Sc *	Sr *	U *	V^	Y^	Zn^	Zr^	La *	Ce *	Pr *	Nd *	Sm *	Eu *	Gd *	Tb *	Dy *	Ho *
IED11001INF	DI-1INF	618162	3.01458e+06	post-caldera	RECALDEC	Geyer et al. 2019	55.677	2.03291	15.8632	9.13425	0.176668	3.34676	6.73646	5.10652	0.825037	0.350745	99.2496	0.150045			130.715	2.0937	0.67717	48.0554	20.3388	5.91201	8.7736	7.5772	4.96275	11.3614	0.578662	1.92971	24.883	351.748	0.55035	252.042	41.3755	93.0201	251.842	14.999	37.0829	5.26828	23.6706	6.23632	2.10187	7.16311	1.2387	7.84035	1.62414
IED110002	DI-2	618843	3.01411e+06	post-caldera	RECALDEC	Geyer et al. 2019	55.9111	2.08782	15.9095	9.36557	0.179291	3.34335	6.74135	5.12758	0.829175	0.357295	99.852	0.145364			128.647	1.4955	0.674429	47.6566	20.5382	5.81268	8.3748	7.3778	4.8513	11.083	0.575142	1.87347	24.9071	348.033	0.538067	259.22	41.874	94.9144	255.731	14.9758	37.2468	5.3172	23.8366	6.38733	2.08054	7.23472	1.24305	7.79452	1.6382
IED110003	DI-3	619035	3013974	post-caldera	RECALDEC	Geyer et al. 2019	55.315	2.03926	15.7497	9.36698	0.175033	3.36072	6.72396	4.94175	0.834938	0.337185	98.8445	0.887936			129.913	2.2931	0.657658	58.823	20.1394	5.77881	8.3748	7.976	4.88502	11.0028	0.571139	1.86771	25.4293	350.533	0.542387	266.897	41.0764	92.8207	251.743	14.8652	36.6048	5.18961	22.9535	6.12862	2.04056	6.96523	1.20759	7.63041	1.5888
IED11004SUP	DI-4SUP	619380	3013650	post-caldera	RECALDEC	Geyer et al. 2019	55.7395	2.03376	15.9703	9.40253	0.17618	3.45279	6.89728	5.01667	0.810272	0.349429	99.8488	-0.940094			126.142	3.4895	0.679861	52.7413	21.4355	5.67214	8.3748	7.7766	4.71338	10.9184	0.557245	1.83787	25.5213	353.455	0.535715	262.111	40.9767	93.4189	249.051	14.6663	36.3426	5.15737	23.0518	6.25476	2.08193	7.06184	1.21848	7.69147	1.60722
IED11004INF	DI-4INF	619380	3013650	post-caldera	RECALDEC	Geyer et al. 2019	56.5632	1.99047	16.1152	9.25189	0.176967	3.31527	6.75805	5.15975	0.860939	0.353327	100.545	-0.191032			133.81	1.1964	0.726512	52.841	20.7376	5.93501	9.3718	8.8733	5.07464	11.5201	0.585527	1.97173	24.5694	347.155	0.567546	253.836	42.5719	91.6243	262.111	15.2776	37.4923	5.32025	23.8156	6.36201	2.08478	7.16854	1.2296	7.82622	1.62666
IED11005INF	DI-5INF	619119	3013967	post-caldera	RECALDEC	Geyer et al. 2019	55.8445	2.03936	15.939	9.15066	0.177496	3.49265	6.89001	5.01717	0.811528	0.346497	99.7089	-0.681363			128.417	11.7646	0.65711	48.6536	20.3388	5.78988	9.0727	8.973	4.82236	10.9954	0.557138	1.87075	25.6948	352.385	0.550096	251.743	41.4752	93.3192	250.048	14.8267	36.5395	5.17902	23.6637	6.31842	2.11462	7.20201	1.23735	7.82324	1.63476
IED11006A	DI-6A	616510	3014678	?	RECALDEC	Martí et al. 2013	52.2392	1.74178	16.4536	8.78303	0.161386	4.94472	9.10871	4.18443	0.49863	0.267714	98.3832	0.325733			88.1375	60.137	0.389322	52.2844	17.4944	3.82448	6.461	22.9614	3.26077	6.11964	0.432598	1.12249	31.91	391.316	0.333291	248.401	30.2176	75.4446	165.004	10.2601	25.4388	3.67077	16.6404	4.72579	1.70812	5.34832	0.9392	5.81293	1.19478
IED110010	DI-10	616235	3015055	post-caldera	RECALDEC	Geyer et al. 2019	54.4058	1.91035	16.1352	8.93113	0.175501	3.54263	7.1388	4.94871	0.796731	0.332294	98.3171	0.110631			117.548	5.467	0.551785	31.2116	19.6812	5.61985	9.0454	6.1628	4.63444	9.94922	0.582978	1.83913	26.0561	385.745	0.526938	253.47	40.0582	93.3366	240.647	14.9862	36.9578	5.25497	23.3499	6.286	2.09554	6.9178	1.20703	7.5517	1.5599
IED110011	DI-11	615930	3016117	pipe breccia	RECALDEC	Geyer et al. 2019	51.6242	1.37627	18.4203	7.08296	0.134359	5.38839	10.3135	3.45917	0.450491	0.222825	98.4724	0.80024			93.5975	129.021	0.244702	55.167	17.395	2.97835	6.461	52.4832	2.74587	4.49262	0.360389	0.865817	30.029	460.628	0.259087	240.548	23.856	63.3178	128.127	9.39207	22.3449	3.1726	14.1497	3.81254	1.4149	4.21879	0.729359	4.61499	0.930466
IED110012	DI-12	615927	3016139	pre-caldera	RECALDEC	Geyer et al. 2019	51.1242	1.36867	18.1028	7.13142	0.132272	5.347	10.1915	3.40343	0.4025	0.219942	97.4237	0.945104			90.7562	129.717	0.217263	53.8748	16.9974	3.01637	5.467	51.7874	2.84621	4.11566	0.362154	0.876557	30.2649	464.301	0.259752	231.105	24.1542	63.2184	127.729	9.44182	22.5216	3.17563	14.3908	3.85179	1.42015	4.33019	0.743888	4.63958	0.93513
IED11016A	DI-16A	615927	3016139	pre-caldera	RECALDEC	Geyer et al. 2019	49.5354	2.26822	15.9963	10.4004	0.181137	4.81428	9.22346	3.8311	0.376865	0.324541	96.9517	3.29033			92.657	43.0402	0.0456209	47.5132	21.0728	4.69376	7.455	22.862	3.58738	2.29062	0.453226	1.16892	35.472	404.866	0.289145	318.577	38.1696	94.5294	203.372	12.9187	32.2684	4.66963	21.2654	5.88174	2.02292	6.61844	1.14108	7.14099	1.47125
IED11016B	DI-16B	615927	3016139	pre-caldera	RECALDEC	Geyer et al. 2019	49.1684	2.25389	15.3909	9.99624	0.176425	4.23656	8.89706	3.86632	0.442767	0.356757	94.7853	4.60138			105.573	25.844	0.0315433	39.4618	18.9854	4.91798	7.952	14.413	3.84345	2.80629	0.478324	1.2682	32.0258	410.882	0.313473	312.514	38.269	92.442	213.412	13.6509	34.347	4.93254	22.4735	6.09787	2.09771	6.8186	1.17704	7.37286	1.50642
IED110018	DI-18	615927	3016139	pre-caldera	RECALDEC	Geyer et al. 2019	48.673	1.46038	17.387	7.5292	0.138156	5.05592	10.2352	3.71484	0.319084	0.228083	94.7408	4.86224			85.6553	143.434	0.0376691	57.652	16.401	3.07237	4.2742	36.778	2.46073	1.68919	0.29158	0.680362	33.0771	525.907	0.167497	263.808	26.2416	65.9022	128.524	8.61702	21.4691	3.13392	14.3738	4.06465	1.49595	4.63565	0.805537	5.06223	1.03458
IED110019	DI-19	615927	3016139	post-caldera	RECALDEC	Geyer et al. 2019	52.685	1.7377	16.4408	8.61829	0.161535	4.68708	8.93252	4.35802	0.531542	0.271461	98.4239	-0.449714			93.1127	30.9134	0.414279	58.0496	18.6872	4.0053	6.8586	18.7866	3.42182	6.34547	0.407173	1.1801	31.1903	399.564	0.348587	251.383	32.305	75.6434	172.061	10.7188	26.5505	3.80768	17.2785	4.84773	1.75787	5.53025	0.957395	5.97133	1.22339
IED110024	DI-24	620276	3.01322e+06	post-caldera	RECALDEC	Geyer et al. 2019	67.3986	0.586192	14.5581	4.38432	0.143275	0.539792	1.74185	6.74783	1.82578	0.131317	98.057	-0.183057			258.245	1.6898	1.14455	4.6718	21.2716	12.0206	14.3136	1.5904	9.65385	28.2456	0.977999	4.64133	9.34794	131.72	1.28489	5.964	63.616	98.7042	513.202	26.557	62.6822	8.40288	35.3129	8.92385	2.22783	9.42331	1.73773	11.1297	2.38351
IED110025	DI-25	621430	3012506	post-caldera	RECALDEC	Geyer et al. 2019	56.6215	1.9621	16.0361	8.94852	0.174226	3.32738	6.73601	5.17366	0.86755	0.3325	100.18	-0.870784			134.926	3.3898	0.731543	54.1371	20.4385	5.94558	9.2721	8.8733	5.11882	11.9116	0.586258	1.97983	24.1631	345.962	0.562361	252.839	41.2758	93.2195	262.61	15.2543	37.4671	5.27241	23.9563	6.41707	2.08354	7.06518	1.2323	7.6792	1.61166
IED110026	DI-26	621609	3012507	post-caldera	RECALDEC	Geyer et al. 2019	55.5661	1.99332	15.8867	9.36025	0.174824	3.13636	6.91494	5.09799	0.814958	0.642048	99.5875	-0.34075			127.75	5.8823	0.603247	46.0614	20.5382	5.76342	8.7736	6.2811	4.8034	10.0932	0.564431	1.85272	25.7142	369.192	0.551351	241.473	43.0704	95.5126	250.347	15.6195	38.2189	5.47759	24.557	6.5752	2.15856	7.39441	1.29312	8.10816	1.68026
IED110029	DI-29	616482	3014208	syn-caldera	RECALDEC	Martí et al. 2013	52.7032	1.91437	16.1447	9.19301	0.174805	4.21429	8.36356	4.54527	0.58308	0.290467	98.1267	0.855223			88.9231	16.3016	0.306208	43.4378	20.7746	4.70669	6.8586	14.413	3.60361	5.89546	0.423203	1.28112	29.4082	359.693	0.36356	251.383	38.4678	85.2852	203.372	11.3237	28.7746	4.2136	19.4938	5.56746	1.93313	6.33911	1.11828	7.06445	1.45825
IED110031	DI-31	616412	3014189	syn-caldera	RECALDEC	Martí et al. 2013	55.6367	1.4477	16.1729	7.42081	0.156943	3.88754	6.91203	5.13666	0.865366	0.253818	97.8905	1.66768			112.148	22.4644	0.586893	51.9862	20.4764	5.91482	8.946	13.7172	4.83106	12.6523	0.522652	1.92171	24.7283	342.971	0.56774	178.125	38.8654	82.005	256.949	13.8769	34.749	4.88775	21.7008	5.89797	1.85602	6.44681	1.14561	7.18394	1.49363
IED110033	DI-33	616381	3.01414e+06	post-caldera	RECALDEC	Martí et al. 2013	49.9642	1.62234	18.9236	8.4168	0.147848	6.37965	10.6977	3.72778	0.441883	0.274563	100.596	0.13			57.7204	124.747	0.132315	41.1516	16.898	3.27007	8.0514	42.9408	1.90992	3.08115	0.488704	0.749511	28.9494	449.115	0.258044	214.605	26.2416	66.3992	153.275	9.46046	23.5009	3.33468	15.2105	4.1442	1.5265	4.54474	0.802714	4.91923	1.02891
IED110034	DI-34	616380	3.01414e+06	post-caldera	RECALDEC	Martí et al. 2013	49.5493	1.61727	18.6434	8.20818	0.147122	6.32998	10.5613	3.69325	0.480857	0.266283	99.4969	0.123343			59.0217	124.548	0.153078	39.6606	17.6932	3.32973	8.1508	43.5372	2.01163	3.6516	0.495526	0.767194	29.2957	442.408	0.270409	215.102	25.347	65.2064	153.076	9.62563	23.7178	3.40641	15.373	4.26388	1.54584	4.62402	0.803319	4.96005	1.02784
IED110035	DI-35	616365	3.01413e+06	syn-caldera	RECALDEC	Martí et al. 2013	54.0687	1.2845	17.9218	7.12248	0.140581	4.60045	9.13434	4.28466	0.602334	0.213571	99.3734	-0.0603258			90.6596	86.3786	0.382294	67.7908	19.7806	4.3197	6.1628	33.3984	3.65299	7.36755	0.379516	1.43875	26.2167	399.949	0.407012	178.522	31.311	67.592	190.152	10.619	26.3866	3.79022	17.2418	4.68796	1.58039	5.21712	0.929153	5.87069	1.19596
IED110036	DI-36	616367	3.01413e+06	syn-caldera	RECALDEC	Martí et al. 2013	54.4873	1.34687	17.2071	7.34518	0.146873	4.35268	8.44882	4.56559	0.668743	0.228143	98.7972	-0.123064			99.2736	58.8448	0.454863	85.5834	19.4824	4.77351	6.7592	28.1302	4.19846	8.38557	0.432729	1.60341	26.3408	389.66	0.46073	182.3	33.299	74.2518	207.945	11.7401	29.2654	4.14995	18.5585	5.0674	1.72164	5.59361	0.988881	6.24	1.32356
IED110037	DI-37	616381	3.01414e+06	post-caldera	RECALDEC	Geyer et al. 2019	48.5619	1.70983	17.3166	8.33243	0.14911	5.67011	9.67156	3.84704	0.4523	0.276004	95.9869	2.67985			60.3534	103.575	0.225956	37.3744	17.7926	3.63708	8.449	26.7386	2.2363	3.48617	0.515102	0.884142	28.9186	412.105	0.283783	225.837	30.5158	64.7094	167.29	10.2677	25.4085	3.67282	16.6316	4.55002	1.64261	5.10376	0.896471	5.47078	1.12313
IED11039OBS	DI-39OBS	617160	3019177	post-caldera	RECALDEC	Geyer et al. 2019	68.4508	0.72464	14.8747	4.32147	0.1496	0.717132	1.96702	6.8939	1.8303	0.173657	100.103	-0.301598			259.45	1.5952	1.67628	3.988	21.4355	11.7524	14.5562	2.2931	10.3578	29.297	0.994236	4.64003	9.76554	140.134	1.33764	8.4745	63.9077	96.3102	503.884	26.2015	62.2541	8.44992	35.6406	9.09021	2.34361	9.56683	1.74678	11.2696	2.42178
IED11039POMEZ	DI-39POMEZ	617160	3019177	post-caldera	RECALDEC	Geyer et al. 2019	67.2436	0.721808	14.6895	4.36148	0.147237	0.724041	1.95248	6.74583	1.79973	0.171444	98.5572	0.404122			260.791	2.2931	1.71576	4.2871	20.7376	11.7143	14.5562	1.3958	10.2445	29.0525	0.987744	4.63441	9.83358	141.08	1.32029	8.7736	62.4122	94.8147	499.098	26.1234	62.2122	8.4215	35.3544	9.01637	2.32116	9.58621	1.74762	11.1895	2.38475
IED110041	DI-41	617044	3019357	post-caldera	RECALDEC	Geyer et al. 2019	67.1844	0.724081	14.6593	4.30198	0.148403	0.736943	1.97705	6.69899	1.80208	0.173299	98.4066	1.56364			255.36	1.6949	1.60183	5.4835	21.8343	11.5298	14.2571	1.5952	10.1163	28.8159	0.973456	4.53569	9.88594	141.866	1.30473	9.4715	62.6116	94.2165	494.512	25.7628	61.06	8.21701	34.8277	8.87597	2.26552	9.4475	1.69422	11.0969	2.33547
IED110043	DI-43	617328	3019314	post-caldera	RECALDEC	Geyer et al. 2019	67.7347	0.724318	14.6888	4.15681	0.1424	0.698007	1.92554	6.79024	1.81099	0.16896	98.8407	0.0403796			260.78	1.7892	1.45192	3.8766	21.4704	11.7792	14.8106	1.3916	10.2355	28.7741	1.00763	4.65057	10.2243	143.122	1.33676	12.3256	61.0316	90.7522	504.057	25.1305	59.8099	8.1217	33.8057	8.67562	2.26758	9.0735	1.69659	10.8296	2.30744
IED110044	DI-44	620336	3.02132e+06	post-caldera	RECALDEC	Geyer et al. 2019	57.4141	1.94688	16.0029	8.57016	0.176788	2.90853	6.06236	5.49647	0.923252	0.374354	99.8757	-0.692702			146.934	0.997	0.793402	31.1064	20.3388	6.36229	9.7706	3.5892	5.57963	12.7356	0.636919	2.19357	21.5814	346.644	0.632822	191.623	43.868	93.9174	280.456	16.8207	40.5639	5.70433	25.6147	6.84953	2.17984	7.51006	1.30661	8.33334	1.72179
IED110045	DI-45	620532	3021309	post-caldera	RECALDEC	Geyer et al. 2019	58.0124	1.83729	16.0497	8.12252	0.175133	2.62993	5.59394	5.61604	0.975923	0.396896	99.4097	0.110809			156.374	2.3928	0.866951	21.5352	20.4385	6.72828	9.8703	2.4925	5.89369	13.6568	0.67872	2.32813	19.6535	343.32	0.673063	156.33	45.4632	95.5126	295.91	17.8425	43.5002	6.07475	27.1546	7.23576	2.27061	7.8887	1.36486	8.61173	1.78949
IED110046	DI-46	620172	3020698	post-caldera	RECALDEC	Geyer et al. 2019	55.9067	2.01353	16.0966	8.91964	0.171394	3.28724	6.78612	5.13353	0.836543	0.325092	99.4764	0.483701			131.804	3.988	0.803752	54.5359	20.2391	5.69359	8.5742	7.3778	4.95192	11.3519	0.577004	1.90747	24.8368	358.168	0.570009	255.132	40.3785	91.4249	251.045	14.9583	36.5022	5.19409	23.0032	6.09978	2.01155	6.81864	1.17261	7.61186	1.56965
IED110047	DI-47	619922	3013101	post-caldera	RECALDEC	Geyer et al. 2019	55.7898	1.97548	15.8999	9.12595	0.173448	3.25151	6.65914	5.11873	0.845316	0.327594	99.1669	-0.112428			135.126	1.7946	0.685896	59.7203	19.4415	5.83706	8.6739	7.1784	5.14013	11.4324	0.585164	1.96829	24.5414	347.742	0.57651	256.229	40.5779	91.8237	256.628	15.2504	37.3968	5.24944	23.4881	6.31373	2.04971	7.04873	1.20733	7.75658	1.60979
IED110048	DI-48	624081	3013413	pre-caldera	RECALDEC	Geyer et al. 2019	50.9837	2.36805	14.9079	10.5657	0.190142	3.70719	7.44585	5.17963	0.617264	0.326618	96.292	2.6149			100.932	0.6958	0.281784	63.0196	19.9794	5.25977	7.1568	8.8466	3.44553	6.44246	0.454955	1.33353	29.1458	307.199	0.3736	329.909	40.1576	97.3126	225.439	12.4388	32.143	4.69054	22.2078	6.27343	2.16919	7.20479	1.26557	7.87506	1.63136
IED110050	DI-50	624081	3013413	pre-caldera	RECALDEC	Martí et al. 2013	50.005	1.81419	15.9256	9.17054	0.169904	5.24993	9.89208	3.87174	0.343318	0.259603	96.702	2.91242			62.1855	64.7094	0.0836357	67.2938	17.9914	3.96246	5.1688	25.1482	2.44899	2.1169	0.318665	0.777153	35.1013	418.893	0.244694	277.823	33.1996	80.4146	174.546	9.04638	24.0516	3.59305	17.0872	4.96528	1.7568	5.63415	1.00482	6.25684	1.27967
IED110054	DI-54	618217	3.01428e+06	post-caldera	RECALDEC	Geyer et al. 2019	55.3462	2.02923	16.0173	9.53877	0.173438	3.50448	7.1853	4.99193	0.772117	0.303616	99.8623	-0.342742			126.678	4.0877	0.618829	73.6783	19.7406	5.42177	8.3748	8.4745	4.72011	10.4049	0.534654	1.77864	26.7564	363.173	0.522442	287.535	38.7833	91.4249	237.884	13.9697	34.1723	4.85139	21.9023	5.76772	1.9463	6.58056	1.13595	7.23906	1.50989
IED110055	DI-55	617784	3.02051e+06	post-caldera	RECALDEC	Geyer et al. 2019	59.7021	1.45846	15.862	7.03183	0.170487	2.0202	4.65303	6.01584	1.12229	0.456267	98.4925	-0.010018			178.835	1.1964	0.930643	13.0607	20.8373	7.70984	11.1664	1.3958	6.82724	15.6579	0.744267	2.73459	15.4883	319.524	0.791834	92.6213	50.5479	96.4099	335.989	20.4827	49.9018	6.99797	30.8509	8.2398	2.46187	8.83031	1.50782	9.51936	1.99889
IED110056	DI-56	617610	3020991	post-caldera	RECALDEC	Geyer et al. 2019	54.2509	2.29757	15.315	10.0157	0.178165	3.46738	7.02072	4.75307	0.747071	0.389906	98.4355	0.0903342			131.346	2.7832	0.64811	100.593	19.5818	5.22619	8.3496	8.8466	5.35208	9.99703	0.575591	1.84997	27.8224	383.668	0.53591	320.366	38.9648	93.1378	225.042	14.6198	35.8668	5.11896	23.1626	6.2669	2.09122	6.91874	1.19614	7.52302	1.56138
IED110057	DI-57	617438	3020837	post-caldera	RECALDEC	Geyer et al. 2019	59.2749	1.6062	16.0175	7.54973	0.172302	2.29752	5.02432	5.87394	1.08465	0.43853	99.3396	0.290465			168.309	1.2961	0.949891	17.946	22.0337	7.36205	10.7676	2.991	6.53659	14.7795	0.708852	2.56559	17.169	328.183	0.736209	112.063	48.6536	95.6123	321.832	19.3678	47.2606	6.72752	29.5364	7.71249	2.37505	8.45911	1.45786	9.12457	1.91756
IED110061	DI-61	621822	3.01886e+06	post-caldera	RECALDEC	Geyer et al. 2019	53.6093	1.92144	16.4273	9.48263	0.170397	4.22128	8.20861	4.65009	0.610224	0.296508	99.5977	-0.0507202			105.087	13.2601	0.483032	46.2608	18.7436	4.36597	7.5772	11.964	3.74316	7.74117	0.454256	1.40347	28.0466	390.462	0.398178	277.266	34.2968	86.6393	191.125	11.9801	29.4419	4.23449	19.1883	5.25194	1.84215	5.9193	1.00642	6.44777	1.32936
IED110063	DI-63	623146	3.01474e+06	post-caldera	RECALDEC	Geyer et al. 2019	57.1573	1.93611	15.8801	8.81902	0.175681	2.95815	6.102	5.42649	0.930281	0.36886	99.754	0.181415			147.077	0	0.765595	54.6356	20.6379	6.46864	9.4715	4.8853	5.59089	12.5465	0.635782	2.20134	22.2947	337.425	0.631009	219.44	43.9677	94.1168	280.057	16.6512	40.6499	5.75839	25.7283	6.75993	2.1587	7.55129	1.3143	8.24825	1.71592
IED110064	DI-64	622943	3.01442e+06	post-caldera	RECALDEC	Geyer et al. 2019	57.2896	1.91387	15.8469	8.67461	0.174625	2.85549	6.00409	5.4561	0.934239	0.385889	99.5354	-0.110842			150.617	1.3958	0.806674	51.3455	19.94	6.55304	9.3718	4.2871	5.8155	13.1818	0.655622	2.25448	22.2202	336.121	0.65861	211.165	44.1671	92.9204	285.94	17.0776	41.3865	5.83753	25.857	6.82967	2.21138	7.58574	1.31657	8.28202	1.73175
IED110066	DI-66	615562	3.01899e+06	pre-caldera	RECALDEC	Geyer et al. 2019	50.6963	1.60296	17.2963	8.38452	0.154428	5.27522	9.93779	4.01932	0.508391	0.262973	98.1382	0.424714			82.0999	98.1078	0.108674	16.5998	16.898	3.72142	7.2562	23.9554	2.79878	4.72308	0.446463	1.07983	31.5482	460.49	0.316556	243.629	28.7266	74.4506	161.923	10.9177	26.6459	3.75744	16.9636	4.57679	1.61657	5.07978	0.896168	5.55119	1.14629
IED1303A1	DEI-2013-3-A1	620275	3021466	post-caldera	PEVOLDEC	Pedrazzi et al. 2017	55.9527	1.88169	16.2868	8.57622	0.17183	3.42302	6.7708	5.05746	0.8215	0.34829	99.2903	0.312256			131.034	16.3	0.713664	35.4	19.3	5.90228	8.8	9	4.90635	10.5913	0.607452	1.92044	24.2315	360.5	0.556643	211.8	40.5	89.8	242.483	15.2678	37.5237	5.31535	23.6535	6.39398	2.11807	7.1099	1.21561	7.63687	1.5662
IED1303A11	DEI-2013-3-A11	620275	3021466	post-caldera	PEVOLDEC	Pedrazzi et al. 2017	58.1746	1.94388	16.0512	8.29965	0.17698	2.71675	5.8128	5.53072	0.94741	0.3804	100.034	0			151.883	0	0.791164	26.8	20.6	6.69647	10	3.8	5.82346	12.8073	0.697728	2.29758	20.7249	341.673	0.658472	174	45.6	91.5	278.009	17.3671	42.2407	5.94309	26.5508	7.04139	2.22964	7.64842	1.34458	8.33506	1.75263
IED1303B7	DEI-2013-3-B7	620275	3021466	post-caldera	PEVOLDEC	Pedrazzi et al. 2017	57.5282	1.9104	16.0019	8.48488	0.175528	2.7896	5.96444	5.43181	0.927987	0.363921	99.5787	0			149.946	0	0.744196	33.233	19.104	6.6169	9.6515	4.975	5.80639	12.8376	0.67544	2.24273	21.5133	342.699	0.642044	187.956	43.581	93.729	271.084	16.9986	41.3684	5.81487	25.9892	6.77438	2.22967	7.68234	1.33347	8.29495	1.70737
IED1304E1	DEI-2013-4-E1	618766	3021381	post-caldera	PEVOLDEC	Pedrazzi et al. 2017	58.2863	1.74183	15.8809	7.70561	0.17515	2.46508	5.30754	5.87914	1.01816	0.400229	98.8599	0.416945			162.222	0	0.874571	18.6065	20.099	7.09429	9.353	2.587	6.23162	13.967	0.728709	2.46301	18.6383	336.027	0.70191	133.827	45.173	94.6245	292.9	18.523	45.1471	6.32124	27.9927	7.33222	2.30126	8.14756	1.42183	8.79976	1.82838
IED1304F5	DEI-2013-4-F5	618766	3021381	post-caldera	PEVOLDEC	Pedrazzi et al. 2017	58.8567	1.74779	16.061	7.79385	0.174732	2.44731	5.35122	5.7061	1.00865	0.40393	99.5512	0.143823			161.905	0	0.917405	18.308	21.094	7.0039	10.2485	3.98	6.19777	14.3523	0.733784	2.45434	18.6031	335.593	0.704037	138.305	46.367	92.535	294.516	18.4355	45.0209	6.3349	27.8398	7.35081	2.3257	8.09971	1.40697	8.82013	1.8228
IED1301C2	DEI-2013-1-C2	622596	3013962	post-caldera	PEVOLDEC	Pedrazzi et al. 2017	57.6527	1.91289	15.9029	8.71737	0.175042	2.8238	5.96867	5.43282	0.933847	0.363013	99.8831	0.0717231			149.56	0	0.728671	54.054	20.196	6.56432	9.801	5.346	5.78497	12.8607	0.678321	2.27983	22.7534	337.335	0.6442	210.474	43.659	92.961	272.958	17.0016	41.6591	5.85175	25.9495	6.86791	2.23012	7.63152	1.33066	8.3579	1.71472
IED1301D5	DEI-2013-1-D5	622596	3013962	post-caldera	PEVOLDEC	Pedrazzi et al. 2017	57.3917	1.90679	15.8456	8.67633	0.175578	2.80522	5.97158	5.40319	0.931837	0.358369	99.4662	0			150.541	0	0.789079	54.526	19.6015	6.61504	9.8505	3.184	5.82038	12.8366	0.67816	2.26499	22.4824	335.115	0.650284	210.542	43.6805	91.2415	273.508	17.0287	41.6396	5.91353	25.8548	6.85605	2.19145	7.5469	1.32192	8.33227	1.72976
	Project Reference
RECALDEC Project	CTM2009-05919-E
PEVOLDEC Project	CTM2011-13578-E
References
Geyer, A., Álvarez-Valero, A. M., Gisbert, G., Aulinas, M., Hernández-Barreña, D., Lobo, A., & Marti, J. (2019). Deciphering the evolution of Deception Island’s magmatic system. Scientific Reports, 9(1), 373. https://doi.org/10.1038/s41598-018-36188-4 Martí, J., Geyer, A., & Aguirre-Diaz, G. (2013). Origin and evolution of the Deception Island caldera (South Shetland Islands, Antarctica). Bulleti…
+		N = normalized to chondrite composition (Sun and McDonough, 1989)
[truncated: 23 more columns]

## Sheet: S1_3_Glass_chemistry_EMP
Table S1-3: Chemical analyses of the glasses in juvenile fragments of Deception Island samples collected by the Spanish RECALDEC and POSVOLDEC projects. . Data for Figure 13.
		UTM WGS84 20S					Major elements (wt%) normalized to 100% (anhydrous) with Fe distributed between FeO and Fe2O3 following Middlemost (1989)													Raw data from JEOL JXA-8230 Electron Microprobe (wt %)
ID analysis point	Sample	x	y	Project	Data first published in:	phase	SiO2	TiO2	Al2O3	Fe2O3	FeO	FeOt	MnO	MgO	CaO	Na2O	K2O	P2O5		SiO2	TiO2	Al2O3	FeO	MnO	MgO	CaO	Na2O	K2O	NiO	Cr2O3	V2O3	Total
DEI-2013-1-C2-A-GLASS-1	DEI-2013-1-C2	622596	3013962	PEVOLDEC	Antoniades et al.2018	post-caldera	58.7537	2.35659	13.3742	3.18733	7.96831	10.8363	0.180068	2.40695	4.99517	5.39801	1.37971	0		58.34	2.34	13.28	10.76	0.1788	2.39	4.96	5.36	1.37	0.0344	0.0361		99.0494
DEI-2013-1-C2-A-GLASS-2	DEI-2013-1-C2	622596	3013962	PEVOLDEC	Antoniades et al.2018	post-caldera	59.5239	2.72075	13.8859	3.02322	7.55806	10.2784	0.213125	1.49671	4.21212	5.84457	1.5216	0		59.07	2.7	13.78	10.2	0.2115	1.4853	4.18	5.8	1.51	0.0089	0.0118		98.9576
DEI-2013-1-C2-A-GLASS-3	DEI-2013-1-C2	622596	3013962	PEVOLDEC	Antoniades et al.2018	post-caldera	58.9943	2.78275	12.9018	3.24424	8.11061	11.0298	0.2549	2.20596	4.85716	5.19109	1.45715	0		58.3	2.75	12.75	10.9	0.2519	2.18	4.8	5.13	1.44	0.0494	0		98.5514
DEI-2013-1-C2-A-GLASS-4	DEI-2013-1-C2	622596	3013962	PEVOLDEC	Antoniades et al.2018	post-caldera	58.9262	2.11381	15.0071	2.63725	6.59313	8.96616	0.192848	2.23403	5.71029	5.44982	1.13555	0		58.82	2.11	14.98	8.95	0.1925	2.23	5.7	5.44	1.1335	0	0		99.5561
DEI-2013-1-C2-A-GLASS-5	DEI-2013-1-C2	622596	3013962	PEVOLDEC	Antoniades et al.2018	post-caldera	58.6855	2.53075	13.1121	3.21783	8.04457	10.94	0.261046	2.2418	5.26077	5.42019	1.22552	0		58.9	2.54	13.16	10.98	0.262	2.25	5.28	5.44	1.23	0	0.0451		100.087
DEI-2013-1-C2-B-GLASS-1	DEI-2013-1-C2	622596	3013962	PEVOLDEC	Antoniades et al.2018	post-caldera	59.5278	2.67243	13.0459	3.0932	7.73301	10.5163	0.249291	1.86662	4.83485	5.51826	1.45861	0		58.36	2.62	12.79	10.31	0.2444	1.83	4.74	5.41	1.43	0.0285	0		97.763
DEI-2013-1-C2-B-GLASS-2	DEI-2013-1-C2	622596	3013962	PEVOLDEC	Antoniades et al.2018	post-caldera	58.9747	2.55926	13.0604	3.23211	8.08028	10.9886	0.220482	2.43739	4.87478	5.25055	1.3101	0		58.07	2.52	12.86	10.82	0.2171	2.4	4.8	5.17	1.29	0	0		98.1472
DEI-2013-1-C2-B-GLASS-3	DEI-2013-1-C2	622596	3013962	PEVOLDEC	Antoniades et al.2018	post-caldera	58.8784	2.95002	13.4379	3.06389	7.65971	10.4166	0.202636	2.02433	5.50332	5.22866	1.05122	0		57.88	2.9	13.21	10.24	0.1992	1.99	5.41	5.14	1.0334	0.0226	0		98.0253
DEI-2013-1-C2-B-GLASS-4	DEI-2013-1-C2	622596	3013962	PEVOLDEC	Antoniades et al.2018	post-caldera	58.9171	2.78683	12.6821	3.25801	8.14503	11.0766	0.266667	2.36274	4.81636	5.402	1.36312	0		58.35	2.76	12.56	10.97	0.2641	2.34	4.77	5.35	1.35	0	0.0097		98.7238
DEI-2013-1-C2-B-GLASS-5	DEI-2013-1-C2	622596	3013962	PEVOLDEC	Antoniades et al.2018	post-caldera	60.2443	2.49231	13.248	2.93629	8.38941	11.0315	0.268944	2.19609	4.88247	3.93253	1.40958	0		58.98	2.44	12.97	10.8	0.2633	2.15	4.78	3.85	1.38	0.0319	0		97.6452
DEI-2013-1-C2-C-GLASS-1	DEI-2013-1-C2	622596	3013962	PEVOLDEC	Antoniades et al.2018	post-caldera	59.7132	2.30834	14.1437	2.77839	6.94596	9.44598	0.213319	2.1666	5.22414	5.32539	1.181	0		58.98	2.28	13.97	9.33	0.2107	2.14	5.16	5.26	1.1665	0.0005	0.0207		98.5184
DEI-2013-1-C2-C-GLASS-2	DEI-2013-1-C2	622596	3013962	PEVOLDEC	Antoniades et al.2018	post-caldera	60.6251	2.33017	13.4824	2.72656	6.81641	9.2698	0.211343	2.23859	4.81297	5.39297	1.3635	0		59.58	2.29	13.25	9.11	0.2077	2.2	4.73	5.3	1.34	0.0332	0.0801		98.1211
DEI-2013-1-C2-C-GLASS-3	DEI-2013-1-C2	622596	3013962	PEVOLDEC	Antoniades et al.2018	post-caldera	59.5962	2.4853	13.3432	2.90607	7.26517	9.88008	0.215426	2.51586	5.20487	5.1845	1.28339	0		58.51	2.44	13.1	9.7	0.2115	2.47	5.11	5.09	1.26	0.0017	0		97.8933
DEI-2013-1-C2-C-GLASS-4	DEI-2013-1-C2	622596	3013962	PEVOLDEC	Antoniades et al.2018	post-caldera	59.1923	2.11329	14.8436	2.57261	6.43152	8.74638	0.153795	2.20429	5.59162	5.91518	0.98182	0		58.54	2.09	14.68	8.65	0.1521	2.18	5.53	5.85	0.971	0	0		98.6432
DEI-2013-1-C2-C-GLASS-5	DEI-2013-1-C2	622596	3013962	PEVOLDEC	Antoniades et al.2018	post-caldera	59.4214	2.39859	13.592	2.96071	7.40178	10.0659	0.22356	2.41909	5.17644	5.11493	1.29155	0		57.97	2.34	13.26	9.82	0.2181	2.36	5.05	4.99	1.26	0	0		97.2682
DEI-2013-1-C2-C-GLASS-6	DEI-2013-1-C2	622596	3013962	PEVOLDEC	Antoniades et al.2018	post-caldera	59.8569	2.37178	13.4231	2.89573	7.23934	9.84495	0.176759	2.41268	5.02982	5.27517	1.31879	0		58.55	2.32	13.13	9.63	0.1729	2.36	4.92	5.16	1.29	0.034	0		97.5669
DEI-2013-1-C2-D-GLASS-1	DEI-2013-1-C2	622596	3013962	PEVOLDEC	Antoniades et al.2018	post-caldera	59.0856	2.38811	13.7924	2.70152	7.71863	10.1495	0.156948	2.5399	5.42385	4.99885	1.19426	0		58.39	2.36	13.63	10.03	0.1551	2.51	5.36	4.94	1.1802	0	0		98.5554
DEI-2013-1-C2-D-GLASS-2	DEI-2013-1-C2	622596	3013962	PEVOLDEC	Antoniades et al.2018	post-caldera	59.2675	2.32262	13.6505	2.70335	7.72385	10.1564	0.260174	2.61804	5.34813	4.94065	1.16528	0		58.18	2.28	13.4	9.97	0.2554	2.57	5.25	4.85	1.1439	0.0847	0		97.9841
DEI-2013-1-C2-D-GLASS-4	DEI-2013-1-C2	622596	3013962	PEVOLDEC	Antoniades et al.2018	post-caldera	58.9427	2.32668	13.7356	2.7271	7.7917	10.2456	0.27114	3.07163	4.9289	5.02074	1.18385	0		57.76	2.28	13.46	10.04	0.2657	3.01	4.83	4.92	1.1601	0	0.0614		97.7873
DEI-2013-1-C2-D-GLASS-5	DEI-2013-1-C2	622596	3013962	PEVOLDEC	Antoniades et al.2018	post-caldera	58.9566	2.34359	13.6234	2.69048	7.68708	10.108	0.223354	2.88363	5.45139	4.93173	1.20878	0		57.86	2.3	13.37	9.92	0.2192	2.83	5.35	4.84	1.1863	0.0009	0		97.8765
DEI-2013-1-C2-E-GLASS-1	DEI-2013-1-C2	622596	3013962	PEVOLDEC	Antoniades et al.2018	post-caldera	58.8664	2.44477	13.5473	3.0071	7.51776	10.2236	0.210735	2.50538	5.22292	5.35425	1.32341	0		58.27	2.42	13.41	10.12	0.2086	2.48	5.17	5.3	1.31	0.0217	0.0256		98.736
DEI-2013-1-C2-E-GLASS-2	DEI-2013-1-C2	622596	3013962	PEVOLDEC	Antoniades et al.2018	post-caldera	58.6011	2.39769	13.9391	2.89269	7.23172	9.83458	0.223716	2.5704	5.54719	5.49639	1.09999	0		57.68	2.36	13.72	9.68	0.2202	2.53	5.46	5.41	1.0827	0	0		98.143
DEI-2013-1-C2-E-GLASS-3	DEI-2013-1-C2	622596	3013962	PEVOLDEC	Antoniades et al.2018	post-caldera	58.8695	2.38135	13.6851	3.01218	7.53045	10.2408	0.223009	2.53466	5.32483	5.04888	1.38998	0		57.6	2.33	13.39	10.02	0.2182	2.48	5.21	4.94	1.36	0.0009	0		97.5492
DEI-2013-1-C2-E-GLASS-4	DEI-2013-1-C2	622596	3013962	PEVOLDEC	Antoniades et al.2018	post-caldera	58.9927	2.48508	13.602	2.9745	7.43626	10.1128	0.1771	2.64737	5.18317	5.07159	1.43019	0		58.16	2.45	13.41	9.97	0.1746	2.61	5.11	5	1.41	0.009	0.0572		98.3609
DEI-2013-1-C2-E-GLASS-5	DEI-2013-1-C2	622596	3013962	PEVOLDEC	Antoniades et al.2018	post-caldera	58.6342	2.4177	13.8764	2.98793	7.46982	10.1584	0.209669	2.70213	5.323	5.18078	1.19839	0		57.72	2.38	13.66	10	0.2064	2.66	5.24	5.1	1.1797	0	0		98.1462
DEI-2013-1-C2-E-GLASS-6	DEI-2013-1-C2	622596	3013962	PEVOLDEC	Antoniades et al.2018	post-caldera	58.8642	2.55398	13.8119	2.93274	7.33184	9.97075	0.202991	2.39053	5.29185	5.33272	1.28721	0		57.62	2.5	13.52	9.76	0.1987	2.34	5.18	5.22	1.26	0.0328	0		97.6316
DEI-2013-1-C2-E-GLASS-8	DEI-2013-1-C2	622596	3013962	PEVOLDEC	Antoniades et al.2018	post-caldera	58.6853	2.55901	13.7155	2.92152	7.3038	9.93261	0.168814	2.68039	5.32032	5.28997	1.35537	0		58.02	2.53	13.56	9.82	0.1669	2.65	5.26	5.23	1.34	0.0281	0		98.6051
DEI-2013-1-C2-H-GLASS-1	DEI-2013-1-C2	622596	3013962	PEVOLDEC	Antoniades et al.2018	post-caldera	60.9036	3.23043	12.1646	3.28405	8.21014	11.1652	0.259141	1.29772	3.75537	5.19897	1.69597	0		60.33	3.2	12.05	11.06	0.2567	1.2855	3.72	5.15	1.68	0.0068	0.0153		98.7543
DEI-2013-1-C2-H-GLASS-2	DEI-2013-1-C2	622596	3013962	PEVOLDEC	Antoniades et al.2018	post-caldera	61.2335	3.20484	13.0404	2.97275	7.43188	10.1068	0.212886	1.24436	3.4761	5.71647	1.46679	0		60.95	3.19	12.98	10.06	0.2119	1.2386	3.46	5.69	1.46	0.0026	0		99.2432
DEI-2013-1-C2-H-GLASS-3	DEI-2013-1-C2	622596	3013962	PEVOLDEC	Antoniades et al.2018	post-caldera	60.3855	3.007	12.5803	3.0896	7.72399	10.504	0.17909	1.39519	3.89683	5.78899	1.95353	0		59.04	2.94	12.3	10.27	0.1751	1.3641	3.81	5.66	1.91	0	0.0111		97.4804
DEI-2013-1-C2-H-GLASS-GENERAL	DEI-2013-1-C2	622596	3013962	PEVOLDEC	Antoniades et al.2018	post-caldera	59.0772	3.08071	11.7691	3.3166	8.2915	11.2758	0.289547	2.20482	5.44662	4.94324	1.58063	0		58.68	3.06	11.69	11.2	0.2876	2.19	5.41	4.91	1.57	0	0.0023		99
DEI-2013-1D5-A-GLASS-1	DEI-2013-1D5	622596	3013962	PEVOLDEC	Antoniades et al.2018	post-caldera	59.4906	2.45838	13.3528	2.71244	7.74984	10.1905	0.19973	2.55018	5.28398	4.90655	1.29549	0		58.32	2.41	13.09	9.99	0.1958	2.5	5.18	4.81	1.27	0	0		97.7659
DEI-2013-1D5-A-GLASS-3	DEI-2013-1D5	622596	3013962	PEVOLDEC	Antoniades et al.2018	post-caldera	59.0751	2.4162	13.5125	3.0458	7.61451	10.3552	0.204159	2.35529	5.21818	5.2994	1.25886	0		58.19	2.38	13.31	10.2	0.2011	2.32	5.14	5.22	1.24	0	0.0194		98.2206
DEI-2013-1D5-A-GLASS-5	DEI-2013-1D5	622596	3013962	PEVOLDEC	Antoniades et al.2018	post-caldera	58.9555	2.31899	13.5462	2.97778	7.44445	10.1239	0.230163	2.5846	5.24072	5.40417	1.29741	0		57.71	2.27	13.26	9.91	0.2253	2.53	5.13	5.29	1.27	0.0404	0		97.6357
DEI-2013-1D5-B-GLASS-1	DEI-2013-1D5	622596	3013962	PEVOLDEC	Antoniades et al.2018	post-caldera	58.7928	2.37649	13.5785	3.06189	7.65473	10.4098	0.185245	2.43743	5.29125	5.33187	1.28981	0		57.89	2.34	13.37	10.25	0.1824	2.4	5.21	5.25	1.27	0	0		98.1625
DEI-2013-1D5-B-GLASS-2	DEI-2013-1D5	622596	3013962	PEVOLDEC	Antoniades et al.2018	post-caldera	59.0698	2.44976	13.5961	2.98431	7.46077	10.1461	0.18955	2.34768	5.23635	5.45071	1.21498	0		57.87	2.4	13.32	9.94	0.1857	2.3	5.13	5.34	1.1903	0	0.0016		97.6777
DEI-2013-1D5-B-GLASS-3	DEI-2013-1D5	622596	3013962	PEVOLDEC	Antoniades et al.2018	post-caldera	58.8403	2.48679	13.6979	2.96207	7.40517	10.0705	0.188051	2.58955	5.45655	5.19965	1.17393	0		57.26	2.42	13.33	9.8	0.183	2.52	5.31	5.06	1.1424	0.0187	0.0302		97.0743
DEI-2013-1D5-B-GLASS-4	DEI-2013-1D5	622596	3013962	PEVOLDEC	Antoniades et al.2018	post-caldera	59.1911	2.46501	13.4138	3.00893	7.52233	10.2298	0.235306	2.52664	5.25869	5.09436	1.28386	0		57.63	2.4	13.06	9.96	0.2291	2.46	5.12	4.96	1.25	0.0264	0		97.0956
DEI-2013-1D5-B-GLASS-5	DEI-2013-1D5	622596	3013962	PEVOLDEC	Antoniades et al.2018	post-caldera	59.1811	2.43363	13.9908	2.73447	6.83618	9.29668	0.217194	2.36236	5.50877	5.62078	1.11469	0		58.12	2.39	13.74	9.13	0.2133	2.32	5.41	5.52	1.0947	0	0.0466		97.9846
DEI-2013-1D5-C-GLASS-1	DEI-2013-1D5	622596	3013962	PEVOLDEC	Antoniades et al.2018	post-caldera	59.7215	2.317	14.2695	2.678	6.695	9.10469	0.182298	1.99038	5.51181	5.29746	1.33712	0		58.51	2.27	13.98	8.92	0.1786	1.95	5.4	5.19	1.31	0.0396	0.0478		97.796
DEI-2013-1D5-C-GLASS-2	DEI-2013-1D5	622596	3013962	PEVOLDEC	Antoniades et al.2018	post-caldera	58.9562	2.49411	13.6061	2.99703	7.49258	10.1893	0.249715	2.14939	5.17071	5.55598	1.32816	0		58.15	2.46	13.42	10.05	0.2463	2.12	5.1	5.48	1.31	0	0		98.3364
DEI-2013-1D5-C-GLASS-3	DEI-2013-1D5	622596	3013962	PEVOLDEC	Antoniades et al.2018	post-caldera	59.4246	2.69	13.2055	2.98206	7.45516	10.1385	0.273076	2.26205	5.2883	4.96224	1.45708	0		58.32	2.64	12.96	9.95	0.268	2.22	5.19	4.87	1.43	0	0.011		97.8591
DEI-2013-1D5-C-GLASS-4	DEI-2013-1D5	622596	3013962	PEVOLDEC	Antoniades et al.2018	post-caldera	59.3868	2.57051	13.0769	3.0543	7.63574	10.384	0.219513	2.3257	5.10021	5.16141	1.46886	0		58.22	2.52	12.82	10.18	0.2152	2.28	5	5.06	1.44	0	0		97.7353
DEI-2013-1D5-C-GLASS-5	DEI-2013-1D5	622596	3013962	PEVOLDEC	Antoniades et al.2018	post-caldera	58.7928	2.64916	13.1639	3.05365	7.63412	10.3818	0.222877	2.50596	5.36991	5.33922	1.26832	0		57.48	2.59	12.87	10.15	0.2179	2.45	5.25	5.22	1.24	0	0.0095		97.4774
DEI-2013-1D5-C-GLASS-6	DEI-2013-1D5	622596	3013962	PEVOLDEC	Antoniades et al.2018	post-caldera	58.8637	2.63935	12.8183	2.9054	8.30115	10.9155	0.242554	2.80303	5.49354	4.70582	1.2272	0		57.54	2.58	12.53	10.67	0.2371	2.74	5.37	4.6	1.1996	0	0.0251		97.4919
DEI-2013-1D5-D-GLASS-2	DEI-2013-1D5	622596	3013962	PEVOLDEC	Antoniades et al.2018	post-caldera	61.7447	2.78378	13.3253	2.70928	6.7732	9.21104	0.167436	1.16673	3.2341	5.936	2.15948	0		60.33	2.72	13.02	9	0.1636	1.14	3.16	5.8	2.11	0	0		97.4437
DEI-2013-1D5-D-GLASS-3	DEI-2013-1D5	622596	3013962	PEVOLDEC	Antoniades et al.2018	post-caldera	64.2254	2.38734	13.9902	2.45935	4.91871	7.13166	0.181883	0.638916	2.95382	6.6461	1.5983	0		63.49	2.36	13.83	7.05	0.1798	0.6316	2.92	6.57	1.58	0	0		98.6115
DEI-2013-1D5-D-GLASS-4	DEI-2013-1D5	622596	3013962	PEVOLDEC	Antoniades et al.2018	post-caldera	63.606	2.9491	13.1939	2.7179	5.4358	7.88139	0.187838	0.770773	3.3704	5.62075	2.1476	0		61.9	2.87	12.84	7.67	0.1828	0.7501	3.28	5.47	2.09	0	0		97.053
DEI-2013-1D5-E-GLASS-2	DEI-2013-1D5	622596	3013962	PEVOLDEC	Antoniades et al.2018	post-caldera	59.1643	0.802959	20.1374	1.13091	2.82727	3.84487	0.101955	1.22417	7.34482	6.85787	0.408327	0		58.32	0.7915	19.85	3.79	0.1005	1.2067	7.24	6.76	0.4025	0.0345	0.0424		98.5381
DEI-2013-1D5-E-GLASS-3	DEI-2013-1D5	622596	3013962	PEVOLDEC	Antoniades et al.2018	post-caldera	62.4777	2.58741	13.9433	2.81844	5.63687	8.17293	0.221059	1.10314	3.68603	5.97568	1.55039	0		60.85	2.52	13.58	7.96	0.2153	1.0744	3.59	5.82	1.51	0	0.0122		97.132
DEI-2013-1D5-F-GLASS-2	DEI-2013-1D5	622596	3013962	PEVOLDEC	Antoniades et al.2018	post-caldera	59.3444	2.66486	13.9495	2.76148	6.9037	9.38851	0.205092	2.61361	4.98124	5.40147	1.17459	0		57.9	2.6	13.61	9.16	0.2001	2.55	4.86	5.27	1.146	0.0068	0.0304		97.3334
DEI-2013-1D5-F-GLASS-3	DEI-2013-1D5	622596	3013962	PEVOLDEC	Antoniades et al.2018	post-caldera	59.6866	2.36901	13.2603	3.08887	7.72217	10.5016	0.294844	2.12288	4.37907	5.4764	1.59985	0		58.2	2.31	12.93	10.24	0.2875	2.07	4.27	5.34	1.56	0.0056	0		97.2131
DEI-2013-1D5-F-GLASS-4	DEI-2013-1D5	622596	3013962	PEVOLDEC	Antoniades et al.2018	post-caldera	59.0732	2.2429	15.1143	2.61211	6.53027	8.88068	0.211156	1.77816	5.56684	5.7588	1.11226	0		58.47	2.22	14.96	8.79	0.209	1.76	5.51	5.7	1.1009	0	0		98.72
DEI-2013-1D5-F-GLASS-5	DEI-2013-1D5	622596	3013962	PEVOLDEC	Antoniades et al.2018	post-caldera	59.6164	2.47674	13.8738	2.93815	7.34538	9.98916	0.245618	2.12732	4.68627	5.13846	1.55181	0		58.01	2.41	13.5	9.72	0.239	2.07	4.56	5	1.51	0	0		97.0191
DEI-2013-1D5-F-GLASS-6	DEI-2013-1D5	622596	3013962	PEVOLDEC	Antoniades et al.2018	post-caldera	59.2793	2.61798	13.0386	3.1798	7.9495	10.8107	0.167345	2.27918	5.02036	5.1025	1.36546	0		57.74	2.55	12.7	10.53	0.163	2.22	4.89	4.97	1.33	0.0073	0		97.1004
DEI-2013-3-A1-B-GLASS-8	DEI-2013-3-A1	620275	3021466	PEVOLDEC	Antoniades et al.2018	post-caldera	56.3725	3.35893	12.9838	3.19657	7.99143	10.8677	0.1662	2.32146	6.65623	5.83447	1.11841	0		54.88	3.27	12.64	10.58	0.1618	2.26	6.48	5.68	1.0888	0.022	0		97.0627
DEI-2013-3-A1-C-GLASS-2	DEI-2013-3-A1	620275	3021466	PEVOLDEC	Antoniades et al.2018	post-caldera	58.1725	2.54422	16.1269	2.40304	6.00761	8.16989	0.178906	1.44534	6.26426	6.01085	0.846385	0		57.39	2.51	15.91	8.06	0.1765	1.4259	6.18	5.93	0.835	0.0232	0		98.4407
DEI-2013-3-A1-D-GLASS-3	DEI-2013-3-A1	620275	3021466	PEVOLDEC	Antoniades et al.2018	post-caldera	53.6501	2.87685	11.0891	3.19557	10.6519	13.5273	0.290031	6.14135	8.30409	3.11148	0.689525	0		52.59	2.82	10.87	13.26	0.2843	6.02	8.14	3.05	0.6759	0.0089	0		97.7192
DEI-2013-3-A1-D-GLASS-4	DEI-2013-3-A1	620275	3021466	PEVOLDEC	Antoniades et al.2018	post-caldera	57.1535	3.47152	11.4267	3.56638	8.91595	12.125	0.324885	1.91288	6.72037	5.02004	1.48779	0		56.47	3.43	11.29	11.98	0.321	1.89	6.64	4.96	1.47	0	0		98.4511
DEI-2013-3-A1-D-GLASS-5	DEI-2013-3-A1	620275	3021466	PEVOLDEC	Antoniades et al.2018	post-caldera	56.0658	3.1108	10.8929	3.84686	10.991	14.4525	0.303533	2.88642	6.03801	4.51831	1.34631	0		54.97	3.05	10.68	14.17	0.2976	2.83	5.92	4.43	1.32	0.0114	0		97.6791
DEI-2013-3-A11-A-GLASS-1	DEI-2013-3-A11	620275	3021466	PEVOLDEC	Antoniades et al.2018	post-caldera	59.2535	3.65015	11.6374	3.4863	8.71574	11.8527	0.214805	1.79432	4.86003	4.76776	1.62001	0		57.79	3.56	11.35	11.56	0.2095	1.75	4.74	4.65	1.58	0.008	0		97.1976
DEI-2013-3-A11-A-GLASS-2	DEI-2013-3-A11	620275	3021466	PEVOLDEC	Antoniades et al.2018	post-caldera	60.3355	3.24644	12.7747	3.05978	7.64945	10.4027	0.19358	1.05142	4.13091	5.83957	1.7187	0		60.03	3.23	12.71	10.35	0.1926	1.0461	4.11	5.81	1.71	0	0.025		99.2137
DEI-2013-3-A11-A-GLASS-3	DEI-2013-3-A11	620275	3021466	PEVOLDEC	Antoniades et al.2018	post-caldera	59.6274	4.50732	10.7215	3.62854	9.07136	12.3364	0.253064	1.1627	4.18026	4.8957	1.95215	0		58.34	4.41	10.49	12.07	0.2476	1.1376	4.09	4.79	1.91	0	0.0674		97.5527
DEI-2013-3-A11-B-GLASS-1	DEI-2013-3-A11	620275	3021466	PEVOLDEC	Antoniades et al.2018	post-caldera	60.6966	2.23411	13.4859	2.96902	7.42254	10.0941	0.24301	1.35184	4.13309	5.62588	1.83806	0		59.77	2.2	13.28	9.94	0.2393	1.3312	4.07	5.54	1.81	0	0		98.1806
DEI-2013-3-A11-B-GLASS-2	DEI-2013-3-A11	620275	3021466	PEVOLDEC	Antoniades et al.2018	post-caldera	60.8049	2.53311	12.9809	3.01022	7.52555	10.2342	0.243036	1.57958	4.03874	5.39176	1.8922	0		59.77	2.49	12.76	10.06	0.2389	1.5527	3.97	5.3	1.86	0	0		98.0016
DEI-2013-3-A11-B-GLASS-3	DEI-2013-3-A11	620275	3021466	PEVOLDEC	Antoniades et al.2018	post-caldera	61.5965	3.26494	11.6358	3.1293	7.82324	10.639	0.257127	1.14558	3.62093	5.48225	2.0444	0		60.56	3.21	11.44	10.46	0.2528	1.1263	3.56	5.39	2.01	0	0.0149		98.024
DEI-2013-3-A11-B-GLASS-4	DEI-2013-3-A11	620275	3021466	PEVOLDEC	Antoniades et al.2018	post-caldera	61.8643	3.12456	12.8522	2.75117	6.87794	9.35347	0.213461	0.839385	3.63016	6.19857	1.64823	0		61.18	3.09	12.71	9.25	0.2111	0.8301	3.59	6.13	1.63	0	0		98.6212
DEI-2013-3-A11-B-GLASS-5	DEI-2013-3-A11	620275	3021466	PEVOLDEC	Antoniades et al.2018	post-caldera	62.0601	3.29432	12.103	2.93701	7.34252	9.98527	0.206765	1.00702	3.57055	5.61671	1.86201	0		60.66	3.22	11.83	9.76	0.2021	0.9843	3.49	5.49	1.82	0	0		97.4565
DEI-2013-3-A11-C-GLASS-1	DEI-2013-3-A11	620275	3021466	PEVOLDEC	Antoniades et al.2018	post-caldera	60.3282	3.07973	12.0656	3.36715	8.41788	11.4477	0.224597	1.4034	3.66731	5.63266	1.81339	0		59.55	3.04	11.91	11.3	0.2217	1.3853	3.62	5.56	1.79	0.0144	0.054		98.4455
DEI-2013-3-A11-C-GLASS-2	DEI-2013-3-A11	620275	3021466	PEVOLDEC	Antoniades et al.2018	post-caldera	61.7782	2.13972	14.5623	2.3892	5.97301	8.12284	0.196023	1.16772	4.17804	6.08452	1.53127	0		60.92	2.11	14.36	8.01	0.1933	1.1515	4.12	6	1.51	0	0.0396		98.4145
DEI-2013-3-A11-C-GLASS-3	DEI-2013-3-A11	620275	3021466	PEVOLDEC	Antoniades et al.2018	post-caldera	61.4168	2.38452	12.8601	2.86542	7.16356	9.7419	0.186074	1.50663	3.62774	6.34854	1.64063	0		60.27	2.34	12.62	9.56	0.1826	1.4785	3.56	6.23	1.61	0.0196	0		97.8708
DEI-2013-3-A11-C-GLASS-4	DEI-2013-3-A11	620275	3021466	PEVOLDEC	Antoniades et al.2018	post-caldera	61.725	3.46884	11.7431	3.0219	7.55476	10.2739	0.199459	1.12544	3.50965	5.56035	2.09151	0		60.5	3.4	11.51	10.07	0.1955	1.1031	3.44	5.45	2.05	0	0.0375		97.7562
DEI-2013-3-A11-C-GLASS-5	DEI-2013-3-A11	620275	3021466	PEVOLDEC	Antoniades et al.2018	post-caldera	60.9857	3.07958	12.9847	2.7887	6.97175	9.48105	0.252626	1.0932	3.69549	6.72458	1.42367	0		60.4	3.05	12.86	9.39	0.2502	1.0827	3.66	6.66	1.41	0	0.0359		98.7989
DEI-2013-3-A11-GLASS-GENERAL-1	DEI-2013-3-A11	620275	3021466	PEVOLDEC	Antoniades et al.2018	post-caldera	60.4605	3.25208	12.6358	3.13618	7.84044	10.6624	0.211536	1.12645	3.977	5.39664	1.96333	0		60.05	3.23	12.55	10.59	0.2101	1.1188	3.95	5.36	1.95	0.0012	0		99.0101
DEI-2013-3-A11-GLASS-GENERAL-10	DEI-2013-3-A11	620275	3021466	PEVOLDEC	Antoniades et al.2018	post-caldera	61.3606	3.33935	12.2375	3.06044	7.65111	10.4049	0.200463	1.05332	3.92985	5.40608	1.7613	0		60.27	3.28	12.02	10.22	0.1969	1.0346	3.86	5.31	1.73	0.0302	0.0043		97.9561
DEI-2013-3-A11-GLASS-GENERAL-11	DEI-2013-3-A11	620275	3021466	PEVOLDEC	Antoniades et al.2018	post-caldera	62.2775	3.35002	11.7916	2.97716	7.44289	10.1218	0.184405	1.25016	3.69834	4.86623	2.16163	0		60.79	3.27	11.51	9.88	0.18	1.2203	3.61	4.75	2.11	0.0073	0		97.3277
DEI-2013-3-A11-GLASS-GENERAL-2	DEI-2013-3-A11	620275	3021466	PEVOLDEC	Antoniades et al.2018	post-caldera	60.3022	3.24796	12.9619	3.04238	7.60595	10.3435	0.264934	1.22183	4.18737	5.63647	1.52904	0		60.34	3.25	12.97	10.35	0.2651	1.2226	4.19	5.64	1.53	0	0.033		99.7907
DEI-2013-3-A11-GLASS-GENERAL-3	DEI-2013-3-A11	620275	3021466	PEVOLDEC	Antoniades et al.2018	post-caldera	60.4695	3.82641	11.7642	3.16092	7.90229	10.7465	0.253703	1.33711	4.33524	5.27149	1.67914	0		59.42	3.76	11.56	10.56	0.2493	1.3139	4.26	5.18	1.65	0.0203	0		97.9736
DEI-2013-3-A11-GLASS-GENERAL-4	DEI-2013-3-A11	620275	3021466	PEVOLDEC	Antoniades et al.2018	post-caldera	59.362	3.60539	12.3396	3.29791	8.24477	11.2123	0.274416	1.33867	4.06241	5.49441	1.98043	0		58.45	3.55	12.15	11.04	0.2702	1.3181	4	5.41	1.95	0	0		98.1384
DEI-2013-3-A11-GLASS-GENERAL-6	DEI-2013-3-A11	620275	3021466	PEVOLDEC	Antoniades et al.2018	post-caldera	61.6064	3.28896	12.2103	3.04427	7.61068	10.35	0.188704	1.0944	3.98787	4.78955	2.17894	0		59.94	3.2	11.88	10.07	0.1836	1.0648	3.88	4.66	2.12	0.0344	0		97.0328
DEI-2013-3-A11-GLASS-GENERAL-7	DEI-2013-3-A11	620275	3021466	PEVOLDEC	Antoniades et al.2018	post-caldera	62.7295	2.98858	12.0563	3.41192	6.82384	9.89393	0.169217	1.17187	3.38637	5.43656	1.82579	0		61.5	2.93	11.82	9.7	0.1659	1.1489	3.32	5.33	1.79	0	0.0345		97.7394
DEI-2013-4-F5-A-GLASS-10	DEI-2013-4-F5	618766	3021381	PEVOLDEC	Antoniades et al.2018	post-caldera	60.1863	2.4038	14.1997	2.95644	7.3911	10.0513	0.238554	1.35566	3.92519	5.85229	1.49097	0		59.34	2.37	14	9.91	0.2352	1.3366	3.87	5.77	1.47	0.0352	0.025		98.3621
DEI-2013-4-F5-A-GLASS-4	DEI-2013-4-F5	618766	3021381	PEVOLDEC	Antoniades et al.2018	post-caldera	58.1697	2.38692	13.6816	3.08913	7.72281	10.5024	0.171757	2.83383	5.84033	4.97698	1.12693	0		57.27	2.35	13.47	10.34	0.1691	2.79	5.75	4.9	1.1095	0.0153	0		98.1639
DEI-2013-4-F5-A-GLASS-6	DEI-2013-4-F5	618766	3021381	PEVOLDEC	Antoniades et al.2018	post-caldera	58.0918	2.29644	14.1546	2.94393	7.35983	10.0088	0.169591	2.60128	6.17803	5.15174	1.05281	0		57.17	2.26	13.93	9.85	0.1669	2.56	6.08	5.07	1.0361	0.0446	0.0149		98.1826
DEI-2013-4-F5-A-GLASS-7	DEI-2013-4-F5	618766	3021381	PEVOLDEC	Antoniades et al.2018	post-caldera	60.8735	1.84932	15.3699	2.28761	5.71901	7.77743	0.168391	1.99316	4.74659	5.79454	1.19795	0		59.25	1.8	14.96	7.57	0.1639	1.94	4.62	5.64	1.166	0.0213	0		97.1313
DEI-2013-4-F5-A-GLASS-8	DEI-2013-4-F5	618766	3021381	PEVOLDEC	Antoniades et al.2018	post-caldera	59.8233	1.19971	18.5935	1.60344	4.00859	5.45138	0.117742	1.33214	5.86682	6.59637	0.85844	0		59.04	1.184	18.35	5.38	0.1162	1.3147	5.79	6.51	0.8472	0.0239	0.0775		98.6336
DEI-2013-4-F5-A-GLASS-9	DEI-2013-4-F5	618766	3021381	PEVOLDEC	Antoniades et al.2018	post-caldera	60.4375	2.38356	14.261	2.85485	7.13713	9.70595	0.228358	1.406	4.02984	5.95891	1.30288	0		59.84	2.36	14.12	9.61	0.2261	1.3921	3.99	5.9	1.29	0	0.04		98.7682
DEI-2013-4-F5-GLASS-GENERAL	DEI-2013-4-F5	618766	3021381	PEVOLDEC	Antoniades et al.2018	post-caldera	57.8684	2.32979	14.0907	2.92064	7.30159	9.92961	0.196252	3.03179	6.02288	5.17845	1.0595	0		56.88	2.29	13.85	9.76	0.1929	2.98	5.92	5.09	1.0414	0	0		98.0044
DEI-2013-4-F5-GLASS-GENERAL	DEI-2013-4-F5	618766	3021381	PEVOLDEC	Antoniades et al.2018	post-caldera	58.1463	2.5019	13.4796	2.78607	7.96021	10.4671	0.199846	3.03292	5.99436	4.77915	1.11963	0		56.94	2.45	13.2	10.25	0.1957	2.97	5.87	4.68	1.0964	0.0064	0.0207		97.6793
DI_29A_G_GLASS4	DI-29A	616482	3014208	RECALDEC	Antoniades et al.2018	syn-caldera	55.5326	1.62154	15.8151	2.03166	6.7722	8.60031	0.143681	4.49515	8.03585	4.84409	0.70814	0		54.11	1.58	15.41	8.38	0.14	4.38	7.83	4.72	0.69	0.04	0.03		97.3
DI_29B_A_1	DI-29B	616482	3014208	RECALDEC	Antoniades et al.2018	syn-caldera	54.1983	3.13077	13.488	3.02139	10.0713	12.79	0.304455	3.99302	7.49333	3.7364	0.563026	0		52.8	3.05	13.14	12.46	0.2966	3.89	7.3	3.64	0.5485	0	0		97.1252
DI_29B_A_2	DI-29B	616482	3014208	RECALDEC	Antoniades et al.2018	syn-caldera	54.179	3.23533	13.5165	3.04501	10.15	12.89	0.227192	3.80023	7.4464	3.80023	0.600128	0		52.75	3.15	13.16	12.55	0.2212	3.7	7.25	3.7	0.5843	0.0064	0		97.072
DI_29B_A_GLASS1	DI-29B	616482	3014208	RECALDEC	Antoniades et al.2018	syn-caldera	53.8444	3.17093	13.4406	2.99387	9.97956	12.6735	0.265949	3.80511	7.46702	4.25518	0.777388	0		52.64	3.1	13.14	12.39	0.26	3.72	7.3	4.16	0.76	0	0.02		97.5
DI_29B_A_GLASS2	DI-29B	616482	3014208	RECALDEC	Antoniades et al.2018	syn-caldera	53.9082	3.26281	13.2975	2.991	9.97	12.6613	0.235989	3.81687	7.58244	4.1965	0.738749	0		52.54	3.18	12.96	12.34	0.23	3.72	7.39	4.09	0.72	0.01	0.03		97.2
DI_29B_A_GLASS3	DI-29B	616482	3014208	RECALDEC	Antoniades et al.2018	syn-caldera	54.1703	3.17273	13.3722	2.92352	9.74507	12.3757	0.264394	3.57949	7.51489	4.51504	0.742337	0		53.27	3.12	13.15	12.17	0.26	3.52	7.39	4.44	0.73	0	0.05		98.09
DI_29B_A_GLASS4	DI-29B	616482	3014208	RECALDEC	Antoniades et al.2018	syn-caldera	53.9905	3.29737	13.3538	2.97745	9.92482	12.604	0.215716	3.74934	7.46787	4.24241	0.780685	0		52.56	3.21	13	12.27	0.21	3.65	7.27	4.13	0.76	0.03	0		97.09
DI_29B_A_GLASS5	DI-29B	616482	3014208	RECALDEC	Antoniades et al.2018	syn-caldera	53.9407	3.24795	13.1871	2.99623	9.98742	12.6835	0.18501	3.73103	7.56485	4.39913	0.760596	0		52.48	3.16	12.83	12.34	0.18	3.63	7.36	4.28	0.74	0	0.01		97.01
DI_29B_A_GLASS6	DI-29B	616482	3014208	RECALDEC	Antoniades et al.2018	syn-caldera	53.4788	3.16777	14.0935	2.95517	9.85056	12.5096	0.141238	3.74281	7.5865	4.25732	0.726367	0		53.01	3.14	13.97	12.4	0.14	3.71	7.52	4.22	0.72	0	0.03		98.85
DI_29B_B_1	DI-29B	616482	3014208	RECALDEC	Antoniades et al.2018	syn-caldera	56.0782	1.59529	16.6369	1.87356	6.24522	7.93107	0.181558	4.22039	7.65583	4.8932	0.619908	0		55.01	1.5649	16.32	7.78	0.1781	4.14	7.51	4.8	0.6081	0	0.0173		97.9285
DI_29B_B_2	DI-29B	616482	3014208	RECALDEC	Antoniades et al.2018	syn-caldera	56.2062	1.49462	16.8577	1.86391	6.21304	7.89021	0.152366	4.08362	7.67474	4.83262	0.621161	0		54.78	1.4567	16.43	7.69	0.1485	3.98	7.48	4.71	0.6054	0.0208	0.0011		97.3026
DI_29B_B_GLASS1	DI-29B	616482	3014208	RECALDEC	Antoniades et al.2018	syn-caldera	56.1309	1.67172	16.6659	2.09107	5.9745	7.85607	0.164095	3.98957	7.5689	5.01516	0.728173	0		54.73	1.63	16.25	7.66	0.16	3.89	7.38	4.89	0.71	0.04	0.01		97.36
DI_29B_B_GLASS2	DI-29B	616482	3014208	RECALDEC	Antoniades et al.2018	syn-caldera	56.0419	1.56632	16.5583	2.12518	6.07193	7.98419	0.203419	4.00735	7.60786	5.08547	0.732308	0		55.1	1.54	16.28	7.85	0.2	3.94	7.48	5	0.72	0.07	0.02		98.21
DI_29B_B_GLASS3	DI-29B	616482	3014208	RECALDEC	Antoniades et al.2018	syn-caldera	55.9086	1.56466	16.5875	1.88435	6.28116	7.97672	0.184078	4.28493	7.73128	4.87807	0.695406	0		54.67	1.53	16.22	7.8	0.18	4.19	7.56	4.77	0.68	0.02	0		97.62
DI_29B_B_GLASS4	DI-29B	616482	3014208	RECALDEC	Antoniades et al.2018	syn-caldera	56.1594	1.64215	16.4827	2.06059	5.88741	7.74155	0.142795	4.07987	7.64975	5.17123	0.724176	0		55.06	1.61	16.16	7.59	0.14	4	7.5	5.07	0.71	0	0.01		97.84
DI_29B_B_GLASS5	DI-29B	616482	3014208	RECALDEC	Antoniades et al.2018	syn-caldera	56.5043	1.69144	16.5761	1.84287	6.14289	7.80112	0.133265	3.91594	7.6576	4.78728	0.748333	0		55.12	1.65	16.17	7.61	0.13	3.82	7.47	4.67	0.73	0	0		97.38
DI_29B_C_GLASS3	DI-29B	616482	3014208	RECALDEC	Antoniades et al.2018	syn-caldera	55.9964	1.60195	16.6459	1.85819	6.19397	7.86599	0.133496	4.14864	7.73249	4.93935	0.749631	0		54.53	1.56	16.21	7.66	0.13	4.04	7.53	4.81	0.73	0.05	0.07		97.33
DI_29B_K_1	DI-29B	616482	3014208	RECALDEC	Antoniades et al.2018	syn-caldera	51.9657	1.99326	14.8186	1.71656	8.58279	10.1274	0.210399	5.77844	9.93609	4.53013	0.468114	0		51.62	1.98	14.72	10.06	0.209	5.74	9.87	4.5	0.465	0.0079	0.0132		99.1851
DI_29B_K_2	DI-29B	616482	3014208	RECALDEC	Antoniades et al.2018	syn-caldera	51.8281	2.08751	14.9621	1.74035	8.70176	10.2677	0.15941	5.68322	9.84824	4.49463	0.49461	0		51.89	2.09	14.98	10.28	0.1596	5.69	9.86	4.5	0.4952	0	0.0252		99.97
DI_29B_L_1	DI-29B	616482	3014208	RECALDEC	Antoniades et al.2018	syn-caldera	55.6722	1.95503	16.4693	2.10124	7.00414	8.89486	0.178716	3.8384	7.33903	4.79033	0.651607	0		54.39	1.91	16.09	8.69	0.1746	3.75	7.17	4.68	0.6366	0.0016	0		97.4929
DI_29B_L_2	DI-29B	616482	3014208	RECALDEC	Antoniades et al.2018	syn-caldera	55.9582	1.94434	16.6032	2.01761	6.72536	8.54082	0.197895	3.99047	7.16656	4.73359	0.662805	0		54.97	1.91	16.31	8.39	0.1944	3.92	7.04	4.65	0.6511	0.0432	0.0017		98.0805
DI_29B_M_1	DI-29B	616482	3014208	RECALDEC	Antoniades et al.2018	syn-caldera	56.7722	1.66364	16.778	1.85781	6.1927	7.86437	0.203231	3.80994	6.91698	5.12407	0.681409	0		55.73	1.6331	16.47	7.72	0.1995	3.74	6.79	5.03	0.6689	0.0352	0.0136		98.0304
DI_29B_N_1	DI-29B	616482	3014208	RECALDEC	Antoniades et al.2018	syn-caldera	55.2341	1.53746	16.7003	1.91932	6.39774	8.12477	0.182474	4.68224	8.26821	4.54905	0.529083	0		53.91	1.5006	16.3	7.93	0.1781	4.57	8.07	4.44	0.5164	0.0497	0		97.4649
DI_30_A_GLASS1	DI-30	616482	3014208	RECALDEC	Antoniades et al.2018	syn-caldera	57.7139	2.34593	14.3599	2.92436	7.3109	9.94227	0.213266	2.71153	5.61601	5.6871	1.11711	0		56.83	2.31	14.14	9.79	0.21	2.67	5.53	5.6	1.1	0.01	0.02		98.23
DI_30_A_GLASS3	DI-30	616482	3014208	RECALDEC	Antoniades et al.2018	syn-caldera	57.5891	2.37861	14.6613	2.92518	7.31295	9.94506	0.276821	2.62468	5.63895	5.46466	1.12779	0		56.17	2.32	14.3	9.7	0.27	2.56	5.5	5.33	1.1	0	0.02		97.27
DI_30_AA_1	DI-30	616482	3014208	RECALDEC	Antoniades et al.2018	syn-caldera	59.7764	1.39619	16.7522	1.86223	5.32066	6.99632	0.193065	3.25195	6.14486	4.35987	0.942554	0		58.27	1.361	16.33	6.82	0.1882	3.17	5.99	4.25	0.9188	0.0464	0.0111		97.3556
DI_30_AA_2	DI-30	616482	3014208	RECALDEC	Antoniades et al.2018	syn-caldera	60.1983	1.47019	16.7218	1.84006	5.25732	6.91302	0.180065	2.9467	6.17889	4.22122	0.985462	0		59.04	1.4419	16.4	6.78	0.1766	2.89	6.06	4.14	0.9665	0	0		97.8951
DI_30_AB_1	DI-30	616482	3014208	RECALDEC	Antoniades et al.2018	syn-caldera	55.7467	1.53996	16.5824	1.91681	6.38936	8.11412	0.196681	4.38082	8.06354	4.61352	0.570316	0		55.1	1.5221	16.39	8.02	0.1944	4.33	7.97	4.56	0.5637	0.0335	0.0401		98.7239
DI_30_AB_2	DI-30	616482	3014208	RECALDEC	Antoniades et al.2018	syn-caldera	55.4767	1.53628	16.8145	1.89562	6.31872	8.02442	0.195097	4.52267	8.24902	4.37974	0.611632	0		54.34	1.5048	16.47	7.86	0.1911	4.43	8.08	4.29	0.5991	0	0.0026		97.7677
DI_30_AB_3	DI-30	616482	3014208	RECALDEC	Antoniades et al.2018	syn-caldera	55.6914	1.61626	16.9341	1.88973	6.29909	7.99948	0.157449	4.40124	8.00965	4.36058	0.640467	0		54.79	1.5901	16.66	7.87	0.1549	4.33	7.88	4.29	0.6301	0	0.0115		98.2066
DI_30_AC_1	DI-30	616482	3014208	RECALDEC	Antoniades et al.2018	syn-caldera	55.4056	1.6509	16.8612	1.97599	6.58663	8.36464	0.125368	4.54777	7.67435	4.55792	0.614253	0		54.58	1.6263	16.61	8.24	0.1235	4.48	7.56	4.49	0.6051	0.0416	0.0082		98.3648
DI_30_AC_2	DI-30	616482	3014208	RECALDEC	Antoniades et al.2018	syn-caldera	55.3404	1.62014	16.6456	1.94579	6.48597	8.23681	0.19823	4.35114	8.06479	4.78625	0.561601	0		54.69	1.6011	16.45	8.14	0.1959	4.3	7.97	4.73	0.555	0	0.0208		98.6529
DI_30_AC_3	DI-30	616482	3014208	RECALDEC	Antoniades et al.2018	syn-caldera	55.6451	1.59324	16.6956	1.9348	6.44933	8.19028	0.113709	4.3695	8.08866	4.52193	0.588155	0		54.76	1.5679	16.43	8.06	0.1119	4.3	7.96	4.45	0.5788	0	0.0065		98.2252
DI_30_AD_1	DI-30	616482	3014208	RECALDEC	Antoniades et al.2018	syn-caldera	56.5245	1.67934	16.5979	1.86425	6.21417	7.89164	0.140726	4.21566	7.52506	4.55169	0.686725	0		55.51	1.6492	16.3	7.75	0.1382	4.14	7.39	4.47	0.6744	0	0		98.0219
DI_30_AD_2	DI-30	616482	3014208	RECALDEC	Antoniades et al.2018	syn-caldera	56.3655	1.57826	16.8401	1.87178	6.23928	7.92353	0.151612	4.06413	7.6676	4.51457	0.70718	0		55.06	1.5417	16.45	7.74	0.1481	3.97	7.49	4.41	0.6908	0	0		97.5007
DI_30_AD_3	DI-30	616482	3014208	RECALDEC	Antoniades et al.2018	syn-caldera	56.1456	1.55292	16.5903	1.95359	6.51196	8.26982	0.14837	4.29706	7.53	4.6315	0.638681	0		55.4	1.5323	16.37	8.16	0.1464	4.24	7.43	4.57	0.6302	0.0224	0.0113		98.5127
DI_30_AE_1	DI-30	616482	3014208	RECALDEC	Antoniades et al.2018	syn-caldera	54.8262	1.6306	16.0091	2.15422	7.18074	9.11913	0.154823	4.92433	8.06536	4.44811	0.606422	0		54.11	1.6093	15.8	9	0.1528	4.86	7.96	4.39	0.5985	0.0575	0.015		98.5532
DI_30_AE_2	DI-30	616482	3014208	RECALDEC	Antoniades et al.2018	syn-caldera	55.2089	1.65657	16.4482	2.08156	6.93854	8.81155	0.164685	4.47667	8.11271	4.35514	0.556951	0		54.51	1.6356	16.24	8.7	0.1626	4.42	8.01	4.3	0.5499	0.0591	0.0139		98.6011
DI_30_AF_1	DI-30	616482	3014208	RECALDEC	Antoniades et al.2018	syn-caldera	56.2983	1.39476	16.7701	1.90852	6.36174	8.07905	0.176168	4.18234	7.96684	4.30475	0.636429	0		55.19	1.3673	16.44	7.92	0.1727	4.1	7.81	4.22	0.6239	0.0143	0		97.8582
DI_30_AF_2	DI-30	616482	3014208	RECALDEC	Antoniades et al.2018	syn-caldera	56.1702	1.60696	16.8327	1.8653	6.21765	7.89607	0.204849	4.31529	7.78385	4.3765	0.626687	0		55.06	1.5752	16.5	7.74	0.2008	4.23	7.63	4.29	0.6143	0	0		97.8404
DI_30_B_GLASSb	DI-30	616482	3014208	RECALDEC	Antoniades et al.2018	syn-caldera	54.8786	1.76896	16.4932	1.9155	6.38499	8.10858	0.173828	4.49908	8.39488	4.86719	0.623737	0		53.67	1.73	16.13	7.93	0.17	4.4	8.21	4.76	0.61	0.03	0		97.64
DI_30_B_GLASSb2	DI-30	616482	3014208	RECALDEC	Antoniades et al.2018	syn-caldera	55.8142	1.6733	16.1889	1.86972	6.2324	7.9148	0.225844	4.31156	8.01745	5.03016	0.636469	0		54.37	1.63	15.77	7.71	0.22	4.2	7.81	4.9	0.62	0.01	0.02		97.24
DI_30_C_GLASS	DI-30	616482	3014208	RECALDEC	Antoniades et al.2018	syn-caldera	55.7832	1.67421	16.167	2.1434	6.12401	8.05266	0.174611	4.21121	7.85751	5.17671	0.688174	0		54.31	1.63	15.74	7.84	0.17	4.1	7.65	5.04	0.67	0	0		97.16
DI_30_C_GLASS1	DI-30	616482	3014208	RECALDEC	Antoniades et al.2018	syn-caldera	55.6046	1.57023	16.5336	1.92499	6.41665	8.14878	0.153944	4.21807	8.02562	4.88516	0.667091	0		54.18	1.53	16.11	7.94	0.15	4.11	7.82	4.76	0.65	0.02	0.03		97.31
DI_30_C_GLASS4	DI-30	616482	3014208	RECALDEC	Antoniades et al.2018	syn-caldera	55.199	1.55779	16.3055	1.98767	6.62557	8.4141	0.163978	4.39665	8.4141	4.69386	0.65591	0		53.86	1.52	15.91	8.21	0.16	4.29	8.21	4.58	0.64	0	0.05		97.43
DI_30_D_GLASS4	DI-30	616482	3014208	RECALDEC	Antoniades et al.2018	syn-caldera	56.07	1.58448	16.5194	1.87876	6.26252	7.95305	0.184004	4.00719	7.97349	4.82499	0.695125	0		54.85	1.55	16.16	7.78	0.18	3.92	7.8	4.72	0.68	0	0.02		97.65
DI_30_D_GLASSb	DI-30	616482	3014208	RECALDEC	Antoniades et al.2018	syn-caldera	55.2986	1.66574	16.606	1.88734	6.29115	7.9894	0.154235	4.34944	8.36984	4.74017	0.637507	0		53.78	1.62	16.15	7.77	0.15	4.23	8.14	4.61	0.62	0	0.03		97.08
DI_30_D_GLASSb2	DI-30	616482	3014208	RECALDEC	Antoniades et al.2018	syn-caldera	55.1798	1.59153	16.5108	1.95503	6.51678	8.27594	0.215626	4.29199	8.36835	4.76431	0.605807	0		53.74	1.55	16.08	8.06	0.21	4.18	8.15	4.64	0.59	0.02	0.03		97.22
DI_30_F_GLASS3	DI-30	616482	3014208	RECALDEC	Antoniades et al.2018	syn-caldera	55.6572	1.63004	16.4337	2.18574	6.24496	8.21171	0.164029	4.01872	7.88365	5.09516	0.686872	0		54.29	1.59	16.03	8.01	0.16	3.92	7.69	4.97	0.67	0.01	0.01		97.34
DI_30_J_1	DI-30	616482	3014208	RECALDEC	Antoniades et al.2018	syn-caldera	53.4807	2.11029	15.4252	2.65605	7.58871	9.97864	0.149127	4.97425	8.27032	4.79337	0.551991	0		53.22	2.1	15.35	9.93	0.1484	4.95	8.23	4.77	0.5493	0.0144	0.0264		99.2885
DI_30_J_2	DI-30	616482	3014208	RECALDEC	Antoniades et al.2018	syn-caldera	53.9424	2.12917	15.085	2.39388	7.97961	10.1337	0.201769	4.93124	8.25556	4.52951	0.551877	0		53.71	2.12	15.02	10.09	0.2009	4.91	8.22	4.51	0.5495	0	0.0127		99.3432
DI_30_J_3	DI-30	616482	3014208	RECALDEC	Antoniades et al.2018	syn-caldera	53.9959	2.25193	14.9961	2.41656	8.05519	10.2296	0.160564	4.75632	8.02819	4.78662	0.552683	0		53.47	2.23	14.85	10.13	0.159	4.71	7.95	4.74	0.5473	0	0.0154		98.8018
DI_30_J_4	DI-30	616482	3014208	RECALDEC	Antoniades et al.2018	syn-caldera	53.669	2.28293	15.1219	2.47457	8.24857	10.4752	0.150815	4.8891	8.06096	4.55576	0.546388	0		53.13	2.26	14.97	10.37	0.1493	4.84	7.98	4.51	0.5409	0.0347	0.0182		98.8032
DI_30_J_GLASS	DI-30	616482	3014208	RECALDEC	Antoniades et al.2018	syn-caldera	53.8292	2.38626	14.8809	2.37339	7.91129	10.0469	0.245795	4.64963	8.40825	4.60866	0.706662	0		52.56	2.33	14.53	9.81	0.24	4.54	8.21	4.5	0.69	0.07	0		97.48
DI_30_J_GLASS2	DI-30	616482	3014208	RECALDEC	Antoniades et al.2018	syn-caldera	54.0681	2.24476	14.897	2.60725	7.44929	9.79532	0.204069	4.75481	8.37704	4.74461	0.653021	0		52.99	2.2	14.6	9.6	0.2	4.66	8.21	4.65	0.64	0	0.01		97.77
DI_30_J_GLASS3	DI-30	616482	3014208	RECALDEC	Antoniades et al.2018	syn-caldera	53.9753	2.20099	15.2032	2.31327	7.71089	9.79239	0.244555	4.64654	8.53904	4.51408	0.652147	0		52.97	2.16	14.92	9.61	0.24	4.56	8.38	4.43	0.64	0.09	0		97.99
DI_30_K_GLASS2	DI-30	616482	3014208	RECALDEC	Antoniades et al.2018	syn-caldera	54.9944	1.92783	15.1868	2.13899	7.12996	9.05465	0.225597	4.93237	8.18302	4.61449	0.666537	0		53.63	1.88	14.81	8.83	0.22	4.81	7.98	4.5	0.65	0.04	0.04		97.38
DI_30_K_GLASS3	DI-30	616482	3014208	RECALDEC	Antoniades et al.2018	syn-caldera	55.134	1.68809	15.9499	1.97698	6.58993	8.36883	0.184155	4.72665	8.27676	4.79827	0.675236	0		53.89	1.65	15.59	8.18	0.18	4.62	8.09	4.69	0.66	0.02	0.02		97.58
DI_30_N_GLASS2	DI-30	616482	3014208	RECALDEC	Antoniades et al.2018	syn-caldera	55.4951	2.11985	14.4498	2.23051	7.43502	9.44206	0.174094	4.52645	8.11075	4.66982	0.788545	0		54.19	2.07	14.11	9.22	0.17	4.42	7.92	4.56	0.77	0	0.06		97.47
DI_30_O_GLASSb3	DI-30	616482	3014208	RECALDEC	Antoniades et al.2018	syn-caldera	55.4592	1.64141	16.4859	1.91453	6.38177	8.10448	0.205177	4.17534	8.16603	4.8832	0.687342	0		54.06	1.6	16.07	7.9	0.2	4.07	7.96	4.76	0.67	0.01	0.01		97.33
DI_30_P_GLASS1	DI-30	616482	3014208	RECALDEC	Antoniades et al.2018	syn-caldera	55.8339	2.69005	13.9636	2.62436	8.74785	11.1093	0.205347	3.70651	7.15634	4.31229	0.759784	0		54.38	2.62	13.6	10.82	0.2	3.61	6.97	4.2	0.74	0.01	0.02		97.15
DI_30_P_GLASS3	DI-30	616482	3014208	RECALDEC	Antoniades et al.2018	syn-caldera	55.7919	2.61158	13.67	2.59547	8.65157	10.987	0.255037	4.03979	7.14104	4.46825	0.775313	0		54.69	2.56	13.4	10.77	0.25	3.96	7	4.38	0.76	0.06	0		97.85
DI_30_P_GLASSb2	DI-30	616482	3014208	RECALDEC	Antoniades et al.2018	syn-caldera	55.2783	1.82158	15.1323	2.19725	7.32415	9.30125	0.172999	4.85416	7.78497	4.77274	0.661468	0		54.32	1.79	14.87	9.14	0.17	4.77	7.65	4.69	0.65	0.05	0.01		98.11
DI_30_P_GLASSb4	DI-30	616482	3014208	RECALDEC	Antoniades et al.2018	syn-caldera	55.2572	1.92021	15.1268	2.20051	7.33503	9.31507	0.194064	4.73925	7.89534	4.68818	0.643475	0		54.1	1.88	14.81	9.12	0.19	4.64	7.73	4.59	0.63	0.02	0.03		97.76
DI_30_P_GLASSc1	DI-30	616482	3014208	RECALDEC	Antoniades et al.2018	syn-caldera	54.6927	1.74246	15.8359	2.07991	6.93302	8.80454	0.143497	4.75589	8.4868	4.67389	0.655984	0		53.36	1.7	15.45	8.59	0.14	4.64	8.28	4.56	0.64	0	0.04		97.41
DI_30_P_GLASSc2	DI-30	616482	3014208	RECALDEC	Antoniades et al.2018	syn-caldera	54.7138	1.75443	16.0959	2.00961	6.69869	8.50696	0.173403	4.70229	8.46616	4.78389	0.601811	0		53.64	1.72	15.78	8.34	0.17	4.61	8.3	4.69	0.59	0.04	0		97.9
DI_33_A_GLASS2	DI-33	616471	3014031	RECALDEC	Antoniades et al.2018	syn-caldera	50.4583	2.59674	14.7047	2.43929	8.13097	10.3259	0.213849	5.39715	10.7128	4.49084	0.855397	0		49.55	2.55	14.44	10.14	0.21	5.3	10.52	4.41	0.84	0.04	0.06		98.05
DI_33_A_GLASS2	DI-33	616471	3014031	RECALDEC	Antoniades et al.2018	syn-caldera	50.4583	2.59674	14.7047	2.43929	8.13097	10.3259	0.213849	5.39715	10.7128	4.49084	0.855397	0		49.55	2.55	14.44	10.14	0.21	5.3	10.52	4.41	0.84	0.04	0.06		98.05
DI_37_A_GLASS1	DI-37	616471	3014031	RECALDEC	Antoniades et al.2018	syn-caldera	51.2824	2.0338	16.2806	1.50127	7.50636	8.85721	0.233887	6.498	9.70124	4.332	0.630479	0		50.43	2	16.01	8.71	0.23	6.39	9.54	4.26	0.62	0	0.02		98.22
DI_37_A_GLASS2	DI-37	616471	3014031	RECALDEC	Antoniades et al.2018	syn-caldera	51.0109	2.07245	16.0974	1.63116	8.15581	9.62354	0.153895	6.49435	9.60302	4.12438	0.656617	0		49.72	2.02	15.69	9.38	0.15	6.33	9.36	4.02	0.64	0.03	0.03		97.39
DI_37_A_GLASS3	DI-37	616471	3014031	RECALDEC	Antoniades et al.2018	syn-caldera	50.9443	1.99184	16.6359	2.14621	7.15404	9.08522	0.203249	6.23974	9.50188	4.52228	0.660558	0		50.13	1.96	16.37	8.94	0.2	6.14	9.35	4.45	0.65	0.01	0.02		98.22
DI_37_B_GLASS2	DI-37	616471	3014031	RECALDEC	Antoniades et al.2018	syn-caldera	50.7308	1.9955	16.2931	1.63188	8.15938	9.62775	0.123433	6.58308	9.68947	4.19671	0.596592	0		49.32	1.94	15.84	9.36	0.12	6.4	9.42	4.08	0.58	0	0.06		97.13
DI_37_B_GLASS4	DI-37	616471	3014031	RECALDEC	Antoniades et al.2018	syn-caldera	50.4475	1.95883	16.5218	2.22404	7.41347	9.41468	0.143579	6.7277	9.50698	4.42018	0.63585	0		49.19	1.91	16.11	9.18	0.14	6.56	9.27	4.31	0.62	0.04	0.06		97.4
DI_37_D_GLASS3	DI-37	616471	3014031	RECALDEC	Antoniades et al.2018	syn-caldera	50.8052	1.96935	16.3262	2.15738	7.19125	9.13248	0.132651	6.64273	9.62227	4.51012	0.642845	0		49.79	1.93	16	8.95	0.13	6.51	9.43	4.42	0.63	0.03	0.04		97.86
DI_37_D_GLASS4	DI-37	616471	3014031	RECALDEC	Antoniades et al.2018	syn-caldera	50.9386	1.91122	16.2198	1.56429	7.82147	9.22904	0.275951	6.7557	9.67874	4.21081	0.623446	0		49.84	1.87	15.87	9.03	0.27	6.61	9.47	4.12	0.61	0	0.03		97.72
DI_37_F_GLASS1	DI-37	616471	3014031	RECALDEC	Antoniades et al.2018	syn-caldera	49.9361	1.86773	16.9327	2.09456	6.98188	8.86659	0.205245	6.88597	9.93386	4.65906	0.50285	0		48.66	1.82	16.5	8.64	0.2	6.71	9.68	4.54	0.49	0.04	0.04		97.33
DI_37_F_GLASS2	DI-37	616471	3014031	RECALDEC	Antoniades et al.2018	syn-caldera	50.7145	1.88514	16.8434	1.99672	6.65574	8.45241	0.184416	6.73119	9.83554	4.58992	0.563494	0		49.5	1.84	16.44	8.25	0.18	6.57	9.6	4.48	0.55	0	0.03		97.45
DI_37_F_GLASS3	DI-37	616471	3014031	RECALDEC	Antoniades et al.2018	syn-caldera	49.7144	1.96255	16.0461	1.64082	8.20411	9.68054	0.172867	7.36209	10.1991	4.13863	0.559275	0		48.89	1.93	15.78	9.52	0.17	7.24	10.03	4.07	0.55	0	0.03		98.2
DI_37_H_GLASS1	DI-37	616471	3014031	RECALDEC	Antoniades et al.2018	syn-caldera	50.5095	1.96603	16.5311	1.54231	7.71154	9.09932	0.102933	6.98918	9.7478	4.30262	0.597014	0		49.07	1.91	16.06	8.84	0.1	6.79	9.47	4.18	0.58	0.05	0.04		97.1
DI_37_H_GLASS2	DI-37	616471	3014031	RECALDEC	Antoniades et al.2018	syn-caldera	50.2496	1.9853	16.3761	1.58836	7.94179	9.37101	0.20573	7.0154	10.0499	3.99117	0.596618	0		48.85	1.93	15.92	9.11	0.2	6.82	9.77	3.88	0.58	0	0.02		97.09
DI_37_H_GLASS4	DI-37	616471	3014031	RECALDEC	Antoniades et al.2018	syn-caldera	51.1986	2.01303	16.5561	1.49537	7.47684	8.82239	0.143788	6.48071	9.7262	4.37525	0.534068	0		49.85	1.96	16.12	8.59	0.14	6.31	9.47	4.26	0.52	0	0.06		97.3
DI_37_H_GLASS5	DI-37	616471	3014031	RECALDEC	Antoniades et al.2018	syn-caldera	51.113	2.03919	16.416	1.51107	7.55537	8.91505	0.204944	6.50696	9.91928	4.16036	0.573843	0		49.88	1.99	16.02	8.7	0.2	6.35	9.68	4.06	0.56	0.01	0.04		97.51
DI_37_I_GLASS1	DI-37	616471	3014031	RECALDEC	Antoniades et al.2018	syn-caldera	51.1665	2.06889	16.2424	1.5754	7.87702	9.29458	0.216153	6.41254	9.66513	4.15837	0.61758	0		49.71	2.01	15.78	9.03	0.21	6.23	9.39	4.04	0.6	0	0.05		97.06
DI_37_I_GLASS2	DI-37	616471	3014031	RECALDEC	Antoniades et al.2018	syn-caldera	51.1027	2.16911	16.0165	1.58738	7.93689	9.36523	0.195323	6.31202	9.76616	4.30739	0.60653	0		49.71	2.11	15.58	9.11	0.19	6.14	9.5	4.19	0.59	0.07	0.02		97.21
DI_37_K_GLASS1	DI-37	616471	3014031	RECALDEC	Antoniades et al.2018	syn-caldera	50.2542	1.99665	16.5978	2.18178	7.27261	9.2358	0.184306	6.64527	9.80919	4.49503	0.563158	0		49.08	1.95	16.21	9.02	0.18	6.49	9.58	4.39	0.55	0.02	0.05		97.51
DI_37_K_GLASS2	DI-37	616471	3014031	RECALDEC	Antoniades et al.2018	syn-caldera	50.3051	1.98358	16.5741	1.5632	7.81602	9.2226	0.204492	6.66645	9.89743	4.39659	0.593028	0		49.2	1.94	16.21	9.02	0.2	6.52	9.68	4.3	0.58	0.04	0.03		97.74
DI_37_K_GLASS3	DI-37	616471	3014031	RECALDEC	Antoniades et al.2018	syn-caldera	50.612	2.0208	16.5441	1.53615	7.68076	9.063	0.173503	6.52169	9.98155	4.33758	0.591953	0		49.59	1.98	16.21	8.88	0.17	6.39	9.78	4.25	0.58	0	0.04		97.87
DI_68_C_GLASS1	DI-68	614675	3019249	RECALDEC	Antoniades et al.2018	syn-caldera	51.8766	2.05746	15.1801	2.28267	7.60891	9.66288	0.194486	5.84481	9.85737	4.53459	0.562986	0		50.68	2.01	14.83	9.44	0.19	5.71	9.63	4.43	0.55	0.02	0.06		97.56
DI_68_C_GLASS2	DI-68	614675	3019249	RECALDEC	Antoniades et al.2018	syn-caldera	52.0953	2.12717	14.88	2.57511	7.35745	9.67455	0.204536	5.93155	9.73592	4.56115	0.531794	0		50.94	2.08	14.55	9.46	0.2	5.8	9.52	4.46	0.52	0	0.05		97.58
DI_68_C_GLASS3	DI-68	614675	3019249	RECALDEC	Antoniades et al.2018	syn-caldera	51.8749	1.90225	16.8426	1.46922	7.34608	8.6681	0.174802	5.19263	10.4264	4.32891	0.442145	0		50.45	1.85	16.38	8.43	0.17	5.05	10.14	4.21	0.43	0	0.05		97.15
DI_68_C_GLASS4	DI-68	614675	3019249	RECALDEC	Antoniades et al.2018	syn-caldera	54.5419	3.19399	13.4066	2.94118	9.80394	12.4505	0.284814	3.39743	7.13053	4.50617	0.793411	0		53.62	3.14	13.18	12.24	0.28	3.34	7.01	4.43	0.78	0	0.04		98.06
DI_68_G_GLASS1	DI-68	614675	3019249	RECALDEC	Antoniades et al.2018	syn-caldera	57.987	2.44487	14.3141	2.87349	7.18373	9.76933	0.334775	3.25644	5.49842	5.00133	1.10577	0		57.16	2.41	14.11	9.63	0.33	3.21	5.42	4.93	1.09	0.03	0.02		98.34
DI_68_G_GLASS2	DI-68	614675	3019249	RECALDEC	Antoniades et al.2018	syn-caldera	58.5238	2.0121	15.2127	2.3776	6.79314	8.93253	0.14227	2.93686	6.02615	5.04042	0.934917	0		57.59	1.98	14.97	8.79	0.14	2.89	5.93	4.96	0.92	0.02	0.05		98.25
DI_68_G_GLASS3	DI-68	614675	3019249	RECALDEC	Antoniades et al.2018	syn-caldera	58.3538	2.31305	14.2638	2.84671	7.11679	9.67829	0.182609	3.17537	5.55944	5.10291	1.08551	0		57.52	2.28	14.06	9.54	0.18	3.13	5.48	5.03	1.07	0	0		98.28
DI_68_H_GLASS3	DI-68	614675	3019249	RECALDEC	Antoniades et al.2018	syn-caldera	57.3888	1.64846	16.4231	1.91317	5.46619	7.18767	0.204777	3.94196	7.18767	4.97608	0.849825	0		56.05	1.61	16.04	7.02	0.2	3.85	7.02	4.86	0.83	0	0.03		97.51
DI_68_I_GLASS2	DI-68	614675	3019249	RECALDEC	Antoniades et al.2018	syn-caldera	56.2684	1.5738	16.5147	1.86131	6.20438	7.87921	0.143073	4.13888	7.7157	4.86447	0.715363	0		55.06	1.54	16.16	7.71	0.14	4.05	7.55	4.76	0.7	0	0.02		97.68
DI-10-A-GLASS1	DI-10	616235	3015055	RECALDEC	Antoniades et al.2018	post-caldera	58.2199	3.12149	13.2663	3.68463	9.21156	12.527	0.242326	1.51341	3.98401	5.35992	1.39646	0		56.7	3.04	12.92	12.2	0.236	1.4739	3.88	5.22	1.36		0	0.0812	97.1112
DI-10-A-GLASS1	DI-10	616235	3015055	RECALDEC	Antoniades et al.2018	post-caldera	58.2199	3.12149	13.2663	3.68463	9.21156	12.527	0.242326	1.51341	3.98401	5.35992	1.39646	0		56.7	3.04	12.92	12.2	0.236	1.4739	3.88	5.22	1.36		0	0.0812	97.1112
DI-10-A-GLASS2	DI-10	616235	3015055	RECALDEC	Antoniades et al.2018	post-caldera	58.7595	3.12333	13.5583	3.37049	8.42623	11.459	0.198971	0.991477	4.21905	6.10329	1.24933	0		57.38	3.05	13.24	11.19	0.1943	0.9682	4.12	5.96	1.22		0.008	0.0815	97.4121
DI-10-A-GLASS2	DI-10	616235	3015055	RECALDEC	Antoniades et al.2018	post-caldera	58.7595	3.12333	13.5583	3.37049	8.42623	11.459	0.198971	0.991477	4.21905	6.10329	1.24933	0		57.38	3.05	13.24	11.19	0.1943	0.9682	4.12	5.96	1.22		0.008	0.0815	97.4121
DI-10-A-GLASS3	DI-10	616235	3015055	RECALDEC	Antoniades et al.2018	post-caldera	58.1812	2.95151	13.5042	3.47851	8.69627	11.8263	0.234302	1.65335	4.40705	5.41785	1.47576	0		57.56	2.92	13.36	11.7	0.2318	1.6357	4.36	5.36	1.46		0.0484	0.0336	98.6695
DI-10-A-GLASS3	DI-10	616235	3015055	RECALDEC	Antoniades et al.2018	post-caldera	58.1812	2.95151	13.5042	3.47851	8.69627	11.8263	0.234302	1.65335	4.40705	5.41785	1.47576	0		57.56	2.92	13.36	11.7	0.2318	1.6357	4.36	5.36	1.46		0.0484	0.0336	98.6695
DI-10-B-GLASS3	DI-10	616235	3015055	RECALDEC	Antoniades et al.2018	post-caldera	57.4025	1.19319	21.4236	1.52643	3.81607	5.18956	0.126515	0.629094	7.62569	5.60923	0.647723	0		56.08	1.1657	20.93	5.07	0.1236	0.6146	7.45	5.48	0.6328		0	0.0024	97.5492
DI-10-B-GLASS3	DI-10	616235	3015055	RECALDEC	Antoniades et al.2018	post-caldera	57.4025	1.19319	21.4236	1.52643	3.81607	5.18956	0.126515	0.629094	7.62569	5.60923	0.647723	0		56.08	1.1657	20.93	5.07	0.1236	0.6146	7.45	5.48	0.6328		0	0.0024	97.5492
DI-10-C-GLASS1	DI-10	616235	3015055	RECALDEC	Antoniades et al.2018	post-caldera	55.3219	2.2829	14.2707	3.35704	9.59156	12.6123	0.219281	2.91761	4.95482	5.82498	1.25918	0		54.04	2.23	13.94	12.32	0.2142	2.85	4.84	5.69	1.23		0	0.0215	97.3758
DI-10-C-GLASS1	DI-10	616235	3015055	RECALDEC	Antoniades et al.2018	post-caldera	55.3219	2.2829	14.2707	3.35704	9.59156	12.6123	0.219281	2.91761	4.95482	5.82498	1.25918	0		54.04	2.23	13.94	12.32	0.2142	2.85	4.84	5.69	1.23		0	0.0215	97.3758
DI-10-C-GLASS2	DI-10	616235	3015055	RECALDEC	Antoniades et al.2018	post-caldera	59.0692	2.34231	13.5629	2.87014	7.17534	9.75792	0.179611	3.10944	5.08353	5.33924	1.26833	0		57.75	2.29	13.26	9.54	0.1756	3.04	4.97	5.22	1.24		0.0202	0.0505	97.5564
DI-10-C-GLASS2	DI-10	616235	3015055	RECALDEC	Antoniades et al.2018	post-caldera	59.0692	2.34231	13.5629	2.87014	7.17534	9.75792	0.179611	3.10944	5.08353	5.33924	1.26833	0		57.75	2.29	13.26	9.54	0.1756	3.04	4.97	5.22	1.24		0.0202	0.0505	97.5564
DI-10-C-GLASS3	DI-10	616235	3015055	RECALDEC	Antoniades et al.2018	post-caldera	54.9678	2.36728	14.0608	3.49817	9.99478	13.1425	0.264686	2.99991	5.42841	5.11209	1.30608	0		53.87	2.32	13.78	12.88	0.2594	2.94	5.32	5.01	1.28		0.0298	0.0406	97.7299
DI-10-C-GLASS3	DI-10	616235	3015055	RECALDEC	Antoniades et al.2018	post-caldera	54.9678	2.36728	14.0608	3.49817	9.99478	13.1425	0.264686	2.99991	5.42841	5.11209	1.30608	0		53.87	2.32	13.78	12.88	0.2594	2.94	5.32	5.01	1.28		0.0298	0.0406	97.7299
DI-10-E-GLASS	DI-10	616235	3015055	RECALDEC	Antoniades et al.2018	post-caldera	57.4407	3.02158	12.3629	3.68153	9.20382	12.5165	0.277575	2.20217	5.31593	5.11108	1.38276	0		56.08	2.95	12.07	12.22	0.271	2.15	5.19	4.99	1.35		0.0329	0.0883	97.3923
DI-10-E-GLASS	DI-10	616235	3015055	RECALDEC	Antoniades et al.2018	post-caldera	57.4407	3.02158	12.3629	3.68153	9.20382	12.5165	0.277575	2.20217	5.31593	5.11108	1.38276	0		56.08	2.95	12.07	12.22	0.271	2.15	5.19	4.99	1.35		0.0329	0.0883	97.3923
DI-16B-E-1	DI-16B	615927	3016139	RECALDEC	Antoniades et al.2018	pre-caldera	53.8219	3.0113	13.2798	2.98969	8.54198	11.2321	0.147252	4.798	7.8896	4.72774	0.792674	0		53.62	3	13.23	11.19	0.1467	4.78	7.86	4.71	0.7897	0	0.0123		99.3388
DI-16B-E-2	DI-16B	615927	3016139	RECALDEC	Antoniades et al.2018	pre-caldera	53.1584	3.1099	12.8796	2.8961	9.65368	12.2596	0.265492	5.31984	8.08975	4.03988	0.587382	0		53.16	3.11	12.88	12.26	0.2655	5.32	8.09	4.04	0.5874	0.0565	0.003		99.7725
DI-16B-E-3	DI-16B	615927	3016139	RECALDEC	Antoniades et al.2018	pre-caldera	53.2176	2.83761	13.282	2.86949	9.56497	12.147	0.251104	5.06787	8.0847	4.16183	0.662806	0		53.45	2.85	13.34	12.2	0.2522	5.09	8.12	4.18	0.6657	0	0		100.148
DI-16B-F-1	DI-16B	615927	3016139	RECALDEC	Antoniades et al.2018	pre-caldera	53.4774	2.82507	12.9516	2.90682	9.68939	12.305	0.14563	5.11298	8.26631	3.99887	0.625992	0		53.76	2.84	13.02	12.37	0.1464	5.14	8.31	4.02	0.6293	0.0133	0		100.249
DI-16B-F-2	DI-16B	615927	3016139	RECALDEC	Antoniades et al.2018	pre-caldera	53.3431	2.93337	13.2102	2.91182	9.70608	12.3262	0.136823	4.77174	8.29781	4.06854	0.620528	0		53.1	2.92	13.15	12.27	0.1362	4.75	8.26	4.05	0.6177	0.0166	0.0307		99.3013
DI-16B-F-3	DI-16B	615927	3016139	RECALDEC	Antoniades et al.2018	pre-caldera	53.0822	2.82108	13.278	2.90826	9.69419	12.3111	0.149328	5.17364	8.19409	4.03723	0.662007	0		53.25	2.83	13.32	12.35	0.1498	5.19	8.22	4.05	0.6641	0.0066	0		100.031
DI-16B-F-4	DI-16B	615927	3016139	RECALDEC	Antoniades et al.2018	pre-caldera	53.2493	3.00308	13.403	2.92339	9.74463	12.3751	0.209208	5.04881	7.89065	3.85967	0.668236	0		52.84	2.98	13.3	12.28	0.2076	5.01	7.83	3.83	0.6631	0	0.035		98.9758
DI-16B-I-1	DI-16B	615927	3016139	RECALDEC	Antoniades et al.2018	pre-caldera	53.3797	2.64842	13.5431	2.70873	9.02911	11.4665	0.365663	5.01595	8.72775	3.91244	0.669128	0		53.21	2.64	13.5	11.43	0.3645	5	8.7	3.9	0.667	0	0.0336		99.4452
DI-16B-I-2	DI-16B	615927	3016139	RECALDEC	Antoniades et al.2018	pre-caldera	53.4673	2.88659	13.9803	2.75374	9.17915	11.657	0.195322	4.88809	8.20717	3.77168	0.670654	0		53.16	2.87	13.9	11.59	0.1942	4.86	8.16	3.75	0.6668	0.0598	0		99.2109
DI-16B-I-3	DI-16B	615927	3016139	RECALDEC	Antoniades et al.2018	pre-caldera	53.0457	2.60568	13.6097	2.77468	9.24893	11.7456	0.290033	5.60222	8.3883	3.8985	0.53627	0		52.93	2.6	13.58	11.72	0.2894	5.59	8.37	3.89	0.5351	0	0		99.5046
DI-16B-K-1	DI-16B	615927	3016139	RECALDEC	Antoniades et al.2018	pre-caldera	52.7166	2.81209	13.8294	2.74025	9.13416	11.5999	0.208697	5.38314	8.46639	4.12774	0.581499	0		52.49	2.8	13.77	11.55	0.2078	5.36	8.43	4.11	0.579	0	0.0247		99.3216
DI-16B-K-2	DI-16B	615927	3016139	RECALDEC	Antoniades et al.2018	pre-caldera	53.0826	2.57321	13.9014	2.70693	9.02311	11.4588	0.143839	5.45803	8.45341	4.0508	0.606715	0		52.81	2.56	13.83	11.4	0.1431	5.43	8.41	4.03	0.6036	0.0166	0.0306		99.264
DI-16B-K-3	DI-16B	615927	3016139	RECALDEC	Antoniades et al.2018	pre-caldera	52.5892	2.54771	13.8921	2.75808	9.1936	11.6753	0.1982	5.15561	8.83675	4.2629	0.565913	0		52.43	2.54	13.85	11.64	0.1976	5.14	8.81	4.25	0.5642	0	0		99.4219
DI-17-C-1	DI-17	615927	3016139	RECALDEC	Antoniades et al.2018	pre-caldera	53.0776	3.09354	13.7867	2.81742	9.39141	11.9266	0.196355	4.9437	8.54454	3.54116	0.607568	0		53.36	3.11	13.86	11.99	0.1974	4.97	8.59	3.56	0.6108	0	0.0656		100.314
DI-17-C-2	DI-17	615927	3016139	RECALDEC	Antoniades et al.2018	pre-caldera	52.9271	2.95263	13.6421	3.00754	10.0251	12.7313	0.170252	5.26469	7.95709	3.43306	0.620352	0		52.88	2.95	13.63	12.72	0.1701	5.26	7.95	3.43	0.6198	0	0		99.6099
DI-17-G-1	DI-17	615927	3016139	RECALDEC	Antoniades et al.2018	pre-caldera	52.8581	2.70913	13.2547	2.91073	9.70242	12.3215	0.25225	5.13731	8.31803	4.1841	0.673269	0		52.68	2.7	13.21	12.28	0.2514	5.12	8.29	4.17	0.671	0	0		99.3725
DI-17-G-2	DI-17	615927	3016139	RECALDEC	Antoniades et al.2018	pre-caldera	52.6711	3.02581	13.3356	2.95857	9.86189	12.524	0.156601	5.03967	8.22579	4.1179	0.607065	0		52.57	3.02	13.31	12.5	0.1563	5.03	8.21	4.11	0.6059	0.0166	0.0138		99.5427
DI-17-G-3	DI-17	615927	3016139	RECALDEC	Antoniades et al.2018	pre-caldera	52.7863	2.82263	13.3196	3.016	10.0533	12.7671	0.238869	5.01243	8.20673	3.89744	0.646694	0		52.55	2.81	13.26	12.71	0.2378	4.99	8.17	3.88	0.6438	0.0631	0.0296		99.3443
DI-17-G-4	DI-17	615927	3016139	RECALDEC	Antoniades et al.2018	pre-caldera	52.8852	2.957	13.3215	2.98358	9.94525	12.6299	0.258913	4.97177	8.30968	3.69876	0.668282	0		52.76	2.95	13.29	12.6	0.2583	4.96	8.29	3.69	0.6667	0.0133	0		99.4783
DI-17-I-1	DI-17	615927	3016139	RECALDEC	Antoniades et al.2018	pre-caldera	53.3105	2.84672	13.3453	2.84971	9.49905	12.0632	0.260849	5.09786	8.1061	4.06819	0.615781	0		52.81	2.82	13.22	11.95	0.2584	5.05	8.03	4.03	0.61	0.0066	0.051		98.8361
DI-17-I-2	DI-17	615927	3016139	RECALDEC	Antoniades et al.2018	pre-caldera	53.1565	2.98168	13.2262	2.72942	9.09806	11.554	0.233095	5.03662	8.50182	4.39193	0.644688	0		52.77	2.96	13.13	11.47	0.2314	5	8.44	4.36	0.64	0	0		99.0015
DI-17-I-3	DI-17	615927	3016139	RECALDEC	Antoniades et al.2018	pre-caldera	53.2862	2.83363	13.3743	2.85559	9.51864	12.0881	0.229102	5.24522	8.0688	3.92889	0.659572	0		53.03	2.82	13.31	12.03	0.228	5.22	8.03	3.91	0.6564	0	0.0084		99.2429
DI-17-I-4	DI-17	615927	3016139	RECALDEC	Antoniades et al.2018	pre-caldera	53.1695	2.91092	13.2296	2.95927	9.86423	12.527	0.228658	5.11921	7.94983	3.98495	0.583791	0		52.97	2.9	13.18	12.48	0.2278	5.1	7.92	3.97	0.5816	0	0		99.3295
DI-17-I-5	DI-17	615927	3016139	RECALDEC	Antoniades et al.2018	pre-caldera	53.3954	3.02051	13.4929	2.84711	9.49036	12.0522	0.168811	5.03749	8.0878	3.83525	0.62437	0		53.74	3.04	13.58	12.13	0.1699	5.07	8.14	3.86	0.6284	0.073	0.0166		100.448
DI-1SUP-E-GLASS2	DI-1SUP	618127	301462	RECALDEC	Antoniades et al.2018	post-caldera	59.4862	2.49858	13.6423	2.71077	7.74505	10.1842	0.204884	2.4586	5.07712	4.95719	1.21931	0		59.52	2.5	13.65	10.19	0.205	2.46	5.08	4.96	1.22		0	0.0775	99.8626
DI-1SUP-E-GLASS3	DI-1SUP	618127	301462	RECALDEC	Antoniades et al.2018	post-caldera	59.0018	2.56485	13.3739	2.82289	8.0654	10.6055	0.205901	2.66663	5.17042	4.95668	1.17159	0		57.97	2.52	13.14	10.42	0.2023	2.62	5.08	4.87	1.1511		0.0123	0.0315	98.0173
DI-1SUP-F-GLASS1	DI-1SUP	618127	301462	RECALDEC	Antoniades et al.2018	post-caldera	58.5429	2.59076	13.2405	3.18065	7.95161	10.8136	0.229072	2.74436	5.16103	5.01767	1.34146	0		57.17	2.53	12.93	10.56	0.2237	2.68	5.04	4.9	1.31		0	0.0532	97.3969
DI-1SUP-F-GLASS3	DI-1SUP	618127	301462	RECALDEC	Antoniades et al.2018	post-caldera	57.9594	2.46745	13.2587	3.17106	7.92765	10.781	0.241421	2.89746	5.84611	5.05775	1.17301	0		56.61	2.41	12.95	10.53	0.2358	2.83	5.71	4.94	1.1457		0	0.0363	97.3979
DI-35-D_GLASS?	DI-35	616471	3014031	RECALDEC	Antoniades et al.2018	syn-caldera	55.4745	1.86982	12.4988	2.19437	7.31457	9.28908	0.19998	5.74943	9.93902	3.85962	0.899911	0		55.48	1.87	12.5	9.29	0.2	5.75	9.94	3.86	0.9	0	0.07		99.87
DI-39-POM-A-1	DI-39-POM	617160	3019177	RECALDEC	Antoniades et al.2018	post-caldera	74.037	0.764905	12.0532	1.47366	2.94732	4.27333	0.183303	0.464239	1.57438	4.62092	1.88108	0		72.42	0.7482	11.79	4.18	0.1793	0.4541	1.54	4.52	1.84	0.053	0		97.7246
DI-41-B_1	DI-41	617158	3019217	RECALDEC	Antoniades et al.2018	post-caldera	75.3564	0.616994	11.508	1.36952	2.73904	3.97134	0.096461	0.460022	1.88168	4.18922	1.78265	0		76.09	0.623	11.62	4.01	0.0974	0.4645	1.9	4.23	1.8	0	0		100.835
DI-44-A-GLASS2	DI-44	620336	3.02132e+06	RECALDEC	Antoniades et al.2018	post-caldera	61.7256	2.00008	14.0108	2.56133	6.40334	8.70805	0.26237	1.89751	4.24633	5.54895	1.34364	0		60.18	1.95	13.66	8.49	0.2558	1.85	4.14	5.41	1.31		0	0.0487	97.2945
DI-44-A-GLASS3	DI-44	620336	3.02132e+06	RECALDEC	Antoniades et al.2018	post-caldera	60.8757	2.0465	14.1626	2.60244	6.50609	8.84779	0.234685	2.08722	4.24572	5.82386	1.41524	0		59.79	2.01	13.91	8.69	0.2305	2.05	4.17	5.72	1.39		0	0.0707	98.0313
DI-44-B-GLASS1	DI-44	620336	3.02132e+06	RECALDEC	Antoniades et al.2018	post-caldera	61.1635	1.55786	14.9184	2.46713	6.16783	8.38779	0.204491	1.68399	4.32655	6.22451	1.28572	0		59.94	1.5267	14.62	8.22	0.2004	1.6503	4.24	6.1	1.26		0.0035	0.0718	97.8328
DI-44-B-GLASS2	DI-44	620336	3.02132e+06	RECALDEC	Antoniades et al.2018	post-caldera	62.102	1.80899	13.8039	2.56369	6.40923	8.71607	0.17648	1.96317	3.93662	5.612	1.62398	0		60.42	1.76	13.43	8.48	0.1717	1.91	3.83	5.46	1.58		0	0.0022	97.044
DI-44-B-GLASS3	DI-44	620336	3.02132e+06	RECALDEC	Antoniades et al.2018	post-caldera	62.2509	1.95077	13.8494	2.50844	6.2711	8.52823	0.24931	1.90991	3.81983	5.57654	1.61372	0		60.95	1.91	13.56	8.35	0.2441	1.87	3.74	5.46	1.58		0	0.071	97.7352
DI-44-B-GLASS5	DI-44	620336	3.02132e+06	RECALDEC	Antoniades et al.2018	post-caldera	63.2258	1.78115	14.2801	2.35906	5.89764	8.02034	0.173482	1.72968	3.59319	5.2611	1.69879	0		61.41	1.73	13.87	7.79	0.1685	1.68	3.49	5.11	1.65		0.0544	0.0542	97.0072
DI-44-C-GLASS1	DI-44	620336	3.02132e+06	RECALDEC	Antoniades et al.2018	post-caldera	56.7798	3.73341	13.3065	3.92858	9.82146	13.3564	0.231691	1.79683	2.99472	5.91956	1.48738	0		56.88	3.74	13.33	13.38	0.2321	1.8	3	5.93	1.49		0.0957	0.0958	99.9737
DI-44-C-GLASS2	DI-44	620336	3.02132e+06	RECALDEC	Antoniades et al.2018	post-caldera	60.4312	1.8872	14.0673	2.69444	6.73609	9.16057	0.236563	2.15243	4.34566	6.23286	1.21627	0		59.24	1.85	13.79	8.98	0.2319	2.11	4.26	6.11	1.1923		0	0.0316	97.7959
DI-44-C-GLASS3	DI-44	620336	3.02132e+06	RECALDEC	Antoniades et al.2018	post-caldera	62.6995	1.90682	14.0859	2.70804	5.41609	7.85281	0.164027	1.86581	3.82389	5.78197	1.54801	0		61.16	1.86	13.74	7.66	0.16	1.82	3.73	5.64	1.51		0.0098	0.0168	97.3067
DI-44-C-GLASS4	DI-44	620336	3.02132e+06	RECALDEC	Antoniades et al.2018	post-caldera	59.9693	2.02075	13.9411	2.85478	7.13696	9.70572	0.207382	2.49022	4.34767	5.53155	1.50025	0		58.76	1.98	13.66	9.51	0.2032	2.44	4.26	5.42	1.47		0	0.0387	97.742
DI-44-C-GLASS5	DI-44	620336	3.02132e+06	RECALDEC	Antoniades et al.2018	post-caldera	61.433	1.92042	14.4338	2.54788	6.36971	8.66232	0.250676	2.03278	3.97363	5.44459	1.59354	0		60.14	1.88	14.13	8.48	0.2454	1.99	3.89	5.33	1.56		0.0393	0.002	97.6867
DI-44-D-GLASS2	DI-44	620336	3.02132e+06	RECALDEC	Antoniades et al.2018	post-caldera	61.4256	2.01596	14.5088	2.52458	6.31145	8.58309	0.150586	1.78178	4.25591	5.59988	1.42542	0		60.33	1.98	14.25	8.43	0.1479	1.75	4.18	5.5	1.4		0.0235	0.0536	98.0451
DI-44-D-GLASS3	DI-44	620336	3.02132e+06	RECALDEC	Antoniades et al.2018	post-caldera	61.1372	2.14535	13.7856	2.54369	7.2677	9.55654	0.268835	1.97084	4.38308	5.11188	1.38575	0		59.56	2.09	13.43	9.31	0.2619	1.92	4.27	4.98	1.35		0.0354	0	97.2074
DI-44-D-GLASS4	DI-44	620336	3.02132e+06	RECALDEC	Antoniades et al.2018	post-caldera	61.7893	2.02235	13.869	2.64508	6.6127	8.99276	0.229439	2.03261	4.05496	5.15339	1.59119	0		60.19	1.97	13.51	8.76	0.2235	1.98	3.95	5.02	1.55		0	0.0682	97.2218
DI-44-D-GLASS5	DI-44	620336	3.02132e+06	RECALDEC	Antoniades et al.2018	post-caldera	61.7924	2.13288	13.9709	2.37137	6.77534	8.90913	0.200634	1.9696	4.23515	5.20464	1.34708	0		60.55	2.09	13.69	8.73	0.1966	1.93	4.15	5.1	1.32		0	0.0657	97.8223
DI-44-E-GLASS1	DI-44	620336	3.02132e+06	RECALDEC	Antoniades et al.2018	post-caldera	60.3665	2.34313	14.0691	2.74469	6.86173	9.33143	0.182929	2.02455	4.38824	5.72423	1.29489	0		58.74	2.28	13.69	9.08	0.178	1.97	4.27	5.57	1.26		0	0.0455	97.0836
DI-46-C-GLASS1	DI-46	620172	3020698	RECALDEC	Antoniades et al.2018	post-caldera	51.006	2.3936	14.5239	1.61939	8.09697	9.55411	0.187532	6.5114	11.2377	3.9251	0.498396	0		50.29	2.36	14.32	9.42	0.1849	6.42	11.08	3.87	0.4914		0.0977	0.0456	98.5797
DI-46-C-GLASS2	DI-46	620172	3020698	RECALDEC	Antoniades et al.2018	post-caldera	50.607	2.51342	14.7933	3.54795	11.8265	15.019	0.228978	3.8163	7.04784	4.57545	1.04333	0		49.33	2.45	14.42	14.64	0.2232	3.72	6.87	4.46	1.017		0.09	0.0664	97.2867
DI-46-E-GLASS1	DI-46	620172	3020698	RECALDEC	Antoniades et al.2018	post-caldera	56.5191	2.18044	15.2631	2.28555	7.61851	9.67507	0.234879	3.48871	6.68331	4.94909	0.777353	0		55.73	2.15	15.05	9.54	0.2316	3.44	6.59	4.88	0.7665		0	0.0039	98.3821
DI-46-E-GLASS2	DI-46	620172	3020698	RECALDEC	Antoniades et al.2018	post-caldera	56.3009	2.39968	15.4657	2.64153	7.54722	9.92409	0.16025	2.98943	6.32457	5.04339	1.12734	0		55.37	2.36	15.21	9.76	0.1576	2.94	6.22	4.96	1.1087		0	0.0749	98.1613
DI-4SUP-A-GLASS1	DI-4SUP	619380	3013650	RECALDEC	Antoniades et al.2018	post-caldera	56.1839	2.24858	17.1097	2.69058	7.68738	10.1084	0.17263	1.43919	5.91786	5.47836	1.07186	0		54.97	2.2	16.74	9.89	0.1689	1.4081	5.79	5.36	1.0487		0	0.046	97.6217
DI-4SUP-A-GLASS3	DI-4SUP	619380	3013650	RECALDEC	Antoniades et al.2018	post-caldera	58.0659	2.46765	12.5413	2.83271	8.09347	10.6424	0.238438	3.62531	6.41792	4.43771	1.27952	0		57.18	2.43	12.35	10.48	0.2348	3.57	6.32	4.37	1.26		0	0.0508	98.2457
DI-4SUP-B-GLASS1	DI-4SUP	619380	3013650	RECALDEC	Antoniades et al.2018	post-caldera	58.6661	2.49643	13.9145	2.97626	7.44066	10.1187	0.205751	2.26111	5.43281	5.57604	1.03029	0		57.34	2.44	13.6	9.89	0.2011	2.21	5.31	5.45	1.007		0	0.0897	97.5378
DI-4SUP-B-GLASS2	DI-4SUP	619380	3013650	RECALDEC	Antoniades et al.2018	post-caldera	58.2588	2.49417	13.4357	3.16694	7.91735	10.767	0.213698	3.05869	5.33731	4.81384	1.30354	0		56.76	2.43	13.09	10.49	0.2082	2.98	5.2	4.69	1.27		0	0.0677	97.186
DI-4SUP-C-GLASS2	DI-4SUP	619380	3013650	RECALDEC	Antoniades et al.2018	post-caldera	57.9835	2.70097	13.1454	2.94404	8.41154	11.0606	0.232201	2.88582	5.86408	4.60089	1.23156	0		56.46	2.63	12.8	10.77	0.2261	2.81	5.71	4.48	1.1992		0	0.1041	97.1895
DI-4SUP-D-GLASS1	DI-4SUP	619380	3013650	RECALDEC	Antoniades et al.2018	post-caldera	57.9187	2.52535	14.259	2.96512	7.41281	10.0809	0.176261	2.63827	5.86168	5.30733	0.935507	0		56.42	2.46	13.89	9.82	0.1717	2.57	5.71	5.17	0.9113		0	0.0534	97.1764
DI-4SUP-D-GLASS3	DI-4SUP	619380	3013650	RECALDEC	Antoniades et al.2018	post-caldera	58.1372	2.46214	13.552	3.10198	7.75495	10.5461	0.20169	2.81094	5.75524	5.18074	1.04312	0		56.67	2.4	13.21	10.28	0.1966	2.74	5.61	5.05	1.0168		0.017	0.0436	97.2341
DI-4SUP-E-GLASS2	DI-4SUP	619380	3013650	RECALDEC	Antoniades et al.2018	post-caldera	58.8944	2.74022	13.0058	3.01275	8.60786	11.3188	0.209709	2.33124	5.18393	4.78517	1.22891	0		57.6	2.68	12.72	11.07	0.2051	2.28	5.07	4.68	1.2019		0.0001	0.0266	97.5338
DI-4SUP-H-GLASS2	DI-4SUP	619380	3013650	RECALDEC	Antoniades et al.2018	post-caldera	58.2331	2.42724	14.0698	2.7403	7.82944	10.2952	0.207447	2.74607	5.6567	5.07046	1.01944	0		56.62	2.36	13.68	10.01	0.2017	2.67	5.5	4.93	0.9912		0	0.087	97.05
DI-4SUP-H-GLASS3	DI-4SUP	619380	3013650	RECALDEC	Antoniades et al.2018	post-caldera	58.9003	2.46746	13.7458	2.83506	8.10018	10.6512	0.204491	2.60111	5.41813	4.60592	1.12156	0		57.29	2.4	13.37	10.36	0.1989	2.53	5.27	4.48	1.0909		0	0.0458	97.0357
DI-4SUP-H-GLASS4	DI-4SUP	619380	3013650	RECALDEC	Antoniades et al.2018	post-caldera	56.5324	2.15303	12.3543	3.19457	10.6486	13.5231	0.251699	5.20828	4.55212	4.09076	1.01428	0		55.14	2.1	12.05	13.19	0.2455	5.08	4.44	3.99	0.9893		0	0.0526	97.2775
DI-4SUP-I-GLASS3	DI-4SUP	619380	3013650	RECALDEC	Antoniades et al.2018	post-caldera	58.2426	2.44604	13.8027	2.89426	8.26931	10.8736	0.224563	2.84687	5.50874	4.66598	1.09897	0		56.67	2.38	13.43	10.58	0.2185	2.77	5.36	4.54	1.0693		0	0.0602	97.078
DI-50-B-1	DI-50	624081	3013413	RECALDEC	Antoniades et al.2018	pre-caldera	54.1267	2.51078	14.9346	2.85426	8.15503	10.7233	0.212466	4.08126	7.4423	5.14159	0.540967	0		54.11	2.51	14.93	10.72	0.2124	4.08	7.44	5.14	0.5408	0	0.0435		99.7268
DI-50-B-2	DI-50	624494	3014224	RECALDEC	Antoniades et al.2018	pre-caldera	54.2468	2.39781	14.9086	2.89742	8.27834	10.8855	0.17186	3.96291	7.37403	5.22703	0.535244	0		54.07	2.39	14.86	10.85	0.1713	3.95	7.35	5.21	0.5335	0.0937	0		99.4785
DI-50-B-3	DI-50	624081	3013413	RECALDEC	Antoniades et al.2018	pre-caldera	53.9239	2.44557	15.2596	2.89429	8.26939	10.8737	0.148857	3.97153	7.4883	5.06294	0.535702	0		53.36	2.42	15.1	10.76	0.1473	3.93	7.41	5.01	0.5301	0	0		98.6674
DI-50-B-4	DI-50	624494	3014224	RECALDEC	Antoniades et al.2018	pre-caldera	54.1658	2.4662	14.9079	2.83205	8.09158	10.6399	0.248331	3.95599	7.459	5.33505	0.538034	0		53.81	2.45	14.81	10.57	0.2467	3.93	7.41	5.3	0.5345	0	0		99.0612
DI-50-E-3	DI-50	624494	3014224	RECALDEC	Antoniades et al.2018	pre-caldera	52.8565	1.79804	15.429	2.29225	7.64082	9.70341	0.2236	5.55485	9.1208	4.69099	0.393159	0		52.62	1.79	15.36	9.66	0.2226	5.53	9.08	4.67	0.3914	0.0134	0		99.3375
DI-60-B-1	DI-60	622102	3018954	RECALDEC	Antoniades et al.2018	post-caldera	55.0446	2.72824	14.2908	2.8542	8.15486	10.7231	0.240745	3.89749	7.16539	4.93682	0.686858	0		55.08	2.73	14.3	10.73	0.2409	3.9	7.17	4.94	0.6873	0.0244	0		99.8027
DI-60-B-4	DI-60	622102	3018954	RECALDEC	Antoniades et al.2018	post-caldera	56.6023	2.92392	13.5019	2.69216	8.97386	11.3963	0.184017	3.26321	6.54638	4.44076	0.871487	0		56.72	2.93	13.53	11.42	0.1844	3.27	6.56	4.45	0.8733	0.0672	0		100.005
DI-60-B-5	DI-60	622102	3018954	RECALDEC	Antoniades et al.2018	post-caldera	56.1571	2.65419	14.2887	2.51037	8.3679	10.6268	0.227901	3.50234	6.69535	4.84939	0.746667	0		56.28	2.66	14.32	10.65	0.2284	3.51	6.71	4.86	0.7483	0	0.0321		99.9989
DI-60-B-6	DI-60	622102	3018954	RECALDEC	Antoniades et al.2018	post-caldera	56.4411	2.49346	14.7992	2.41814	8.06045	10.2363	0.215023	3.17992	6.71316	4.8254	0.854137	0		55.91	2.47	14.66	10.14	0.213	3.15	6.65	4.78	0.8461	0.0123	0		98.8315
DI-60-B-7	DI-60	622102	3018954	RECALDEC	Antoniades et al.2018	post-caldera	55.2793	2.50356	14.7398	2.79933	7.99808	10.5169	0.163686	4.06199	6.84707	4.91662	0.690539	0		54.98	2.49	14.66	10.46	0.1628	4.04	6.81	4.89	0.6868	0.0673	0		99.2469
DI-60-B-8	DI-60	622102	3018954	RECALDEC	Antoniades et al.2018	post-caldera	55.8512	2.45943	14.2627	2.47399	8.24662	10.4727	0.104123	3.84034	7.1263	4.91886	0.71646	0		55.41	2.44	14.15	10.39	0.1033	3.81	7.07	4.88	0.7108	0.0428	0		99.007
DI-60-C-1	DI-60	622102	3018954	RECALDEC	Antoniades et al.2018	post-caldera	55.728	2.43829	14.2368	2.5682	8.56066	10.8715	0.242821	3.86902	6.82117	4.75567	0.779346	0		55.31	2.42	14.13	10.79	0.241	3.84	6.77	4.72	0.7735	0	0.0084		99.0029
DI-60-C-2	DI-60	622102	3018954	RECALDEC	Antoniades et al.2018	post-caldera	55.7341	2.53015	14.1688	2.59401	8.64672	10.9808	0.145635	3.85594	6.96296	4.63523	0.726456	0		55.07	2.5	14	10.85	0.1439	3.81	6.88	4.58	0.7178	0.0061	0		98.5578
DI-60-C-3	DI-60	622102	3018954	RECALDEC	Antoniades et al.2018	post-caldera	55.8917	2.47052	13.8929	2.63453	8.78177	11.1523	0.184539	3.67077	6.92145	4.741	0.81077	0		55.88	2.47	13.89	11.15	0.1845	3.67	6.92	4.74	0.8106	0.0794	0.0491		99.8437
DI-60-E-1	DI-60	622102	3018954	RECALDEC	Antoniades et al.2018	post-caldera	55.9583	2.33745	14.2655	2.3983	7.99434	10.1524	0.260731	4.01279	7.22302	4.78525	0.764336	0		55.78	2.33	14.22	10.12	0.2599	4	7.2	4.77	0.7619	0	0.0147		99.4566
DI-60-E-2	DI-60	622102	3018954	RECALDEC	Antoniades et al.2018	post-caldera	55.2389	2.4521	14.6408	2.8374	8.10685	10.66	0.176572	3.89874	6.98695	4.93498	0.726704	0		53.84	2.39	14.27	10.39	0.1721	3.8	6.81	4.81	0.7083	0	0.047		97.2374
DI-60-E-4	DI-60	622102	3018954	RECALDEC	Antoniades et al.2018	post-caldera	54.6086	2.35047	13.9933	2.80686	9.3562	11.8818	0.270503	4.13325	7.14105	4.58143	0.758326	0		54.83	2.36	14.05	11.93	0.2716	4.15	7.17	4.6	0.7614	0.0214	0		100.144
DI-60-E-6	DI-60	622102	3018954	RECALDEC	Antoniades et al.2018	post-caldera	55.9776	2.54945	14.6343	2.40904	8.03014	10.1978	0.216804	3.5331	6.98591	5.00857	0.655129	0		55.77	2.54	14.58	10.16	0.216	3.52	6.96	4.99	0.6527	0.0214	0		99.4101
DI-60-H-1	DI-60	622102	3018954	RECALDEC	Antoniades et al.2018	post-caldera	55.7662	2.58766	14.2625	2.53111	8.43702	10.7145	0.189728	3.90171	6.73197	4.90241	0.689774	0		55.17	2.56	14.11	10.6	0.1877	3.86	6.66	4.85	0.6824	0	0.0008		98.681
DI-60-H-2	DI-60	622102	3018954	RECALDEC	Antoniades et al.2018	post-caldera	55.5387	2.50891	14.5497	2.46594	8.21982	10.4387	0.195373	3.91955	7.00279	4.82639	0.772826	0		55.12	2.49	14.44	10.36	0.1939	3.89	6.95	4.79	0.767	0.0641	0.0174		99.0825
DI-60-H-3	DI-60	622102	3018954	RECALDEC	Antoniades et al.2018	post-caldera	55.6202	2.67905	13.8051	2.93485	8.38528	11.0261	0.221921	3.76866	6.90754	4.90826	0.769127	0		55.64	2.68	13.81	11.03	0.222	3.77	6.91	4.91	0.7694	0	0.0018		99.7432
DI-60-H-4	DI-60	622102	3018954	RECALDEC	Antoniades et al.2018	post-caldera	56.4809	2.58976	14.2084	2.50902	8.36338	10.621	0.217459	3.33544	6.72127	4.75628	0.818141	0		56.05	2.57	14.1	10.54	0.2158	3.31	6.67	4.72	0.8119	0	0		98.9877
DI-60-I-1	DI-60	622102	3018954	RECALDEC	Antoniades et al.2018	post-caldera	56.2657	2.32705	14.1553	2.55656	8.52187	10.8223	0.216141	3.6684	6.89984	4.61344	0.775648	0		55.37	2.29	13.93	10.65	0.2127	3.61	6.79	4.54	0.7633	0	0.0111		98.1672
DI-60-I-2	DI-60	622102	3018954	RECALDEC	Antoniades et al.2018	post-caldera	56.0166	2.60938	13.7967	2.60501	8.68336	11.0274	0.184356	3.51916	6.99833	4.79886	0.788212	0		56.03	2.61	13.8	11.03	0.1844	3.52	7	4.8	0.7884	0	0.0287		99.7916
DI-60-I-3	DI-60	622102	3018954	RECALDEC	Antoniades et al.2018	post-caldera	56	2.63175	13.8418	2.86083	8.17379	10.748	0.238666	3.56592	6.86063	4.9722	0.854415	0		55.75	2.62	13.78	10.7	0.2376	3.55	6.83	4.95	0.8506	0.0367	0.0201		99.3251
DI-60-J-1	DI-60	622102	3018954	RECALDEC	Antoniades et al.2018	post-caldera	55.9979	2.78437	14.633	2.39915	7.99717	10.1559	0.169166	3.5055	6.87079	4.93775	0.705207	0		55.91	2.78	14.61	10.14	0.1689	3.5	6.86	4.93	0.7041	0.0061	0		99.6092
DI-60-J-2	DI-60	622102	3018954	RECALDEC	Antoniades et al.2018	post-caldera	56.011	2.40476	14.4586	2.44985	8.16615	10.3705	0.225547	3.77748	6.92372	4.89971	0.683154	0		55.9	2.4	14.43	10.35	0.2251	3.77	6.91	4.89	0.6818	0	0.0418		99.5988
DI-60-J-3	DI-60	622102	3018954	RECALDEC	Antoniades et al.2018	post-caldera	56.0357	2.62794	14.6053	2.44022	8.13407	10.3298	0.322225	3.72965	6.75177	4.6191	0.734104	0		55.44	2.6	14.45	10.22	0.3188	3.69	6.68	4.57	0.7263	0.0183	0		98.7135
DI-60-K-1	DI-60	622102	3018954	RECALDEC	Antoniades et al.2018	post-caldera	55.7497	2.58128	13.7433	2.63444	8.78146	11.152	0.236248	4.07359	6.94728	4.49708	0.75563	0		55.29	2.56	13.63	11.06	0.2343	4.04	6.89	4.46	0.7494	0	0.0063		98.92
DI-60-K-2	DI-60	622102	3018954	RECALDEC	Antoniades et al.2018	post-caldera	55.4935	2.45921	13.828	2.71662	9.05539	11.4998	0.217197	4.20283	6.65196	4.54551	0.829782	0		55.06	2.44	13.72	11.41	0.2155	4.17	6.6	4.51	0.8233	0	0		98.9489
DI-60-K-3	DI-60	622102	3018954	RECALDEC	Antoniades et al.2018	post-caldera	52.0964	2.08991	15.2654	2.5046	7.15599	9.40965	0.246347	5.94666	9.67215	4.5029	0.519651	0		51.6	2.07	15.12	9.32	0.244	5.89	9.58	4.46	0.5147	0.0031	0.0441		98.846
DI-60-K-4	DI-60	622102	3018954	RECALDEC	Antoniades et al.2018	post-caldera	52.4011	2.08761	15.4463	2.26663	7.55545	9.59499	0.235559	5.98181	9.26378	4.32577	0.43599	0		52.21	2.08	15.39	9.56	0.2347	5.96	9.23	4.31	0.4344	0.0213	0.0334		99.4639
DI-60-K-5	DI-60	622102	3018954	RECALDEC	Antoniades et al.2018	post-caldera	52.2082	1.84524	15.7948	2.21979	7.39929	9.39668	0.210197	5.987	9.47691	4.38244	0.476052	0		52.06	1.84	15.75	9.37	0.2096	5.97	9.45	4.37	0.4747	0.0885	0.0442		99.6271
DI-60-L-1	DI-60	622102	3018954	RECALDEC	Antoniades et al.2018	post-caldera	55.9736	2.62486	14.2464	2.48976	8.29919	10.5395	0.240946	3.8371	6.91279	4.6486	0.726845	0		55.87	2.62	14.22	10.52	0.2405	3.83	6.9	4.64	0.7255	0	0.0204		99.5865
DI-60-L-2	DI-60	622102	3018954	RECALDEC	Antoniades et al.2018	post-caldera	55.9363	2.42066	14.3733	2.46055	8.20184	10.4159	0.21354	3.90721	6.87025	4.89154	0.724792	0		55.69	2.41	14.31	10.37	0.2126	3.89	6.84	4.87	0.7216	0	0.0175		99.3318
DI-64-A-GLASS-1	DI-64	622943	3.01442e+06	RECALDEC	Antoniades et al.2018	post-caldera	60.0534	2.32425	13.5276	2.80953	7.02382	9.55186	0.173198	2.39561	4.90336	5.50481	1.28446	0		58.91	2.28	13.27	9.37	0.1699	2.35	4.81	5.4	1.26		0	0.0579	97.8779
DI-64-A-GLASS-2	DI-64	622943	3.01442e+06	RECALDEC	Antoniades et al.2018	post-caldera	60.7735	2.40353	13.5211	2.48824	7.10926	9.3482	0.254774	2.26034	4.69456	5.08321	1.41143	0		59.42	2.35	13.22	9.14	0.2491	2.21	4.59	4.97	1.38		0	0.09	97.6191
DI-64-A-GLASS-3	DI-64	622943	3.01442e+06	RECALDEC	Antoniades et al.2018	post-caldera	59.9498	2.42902	13.7576	2.61332	7.46664	9.81814	0.230042	2.29634	4.9601	5.03154	1.26554	0		58.74	2.38	13.48	9.62	0.2254	2.25	4.86	4.93	1.24		0	0.0233	97.7488
DI-64-A-GLASS-4	DI-64	622943	3.01442e+06	RECALDEC	Antoniades et al.2018	post-caldera	59.9679	2.2695	14.3224	2.64609	6.61523	8.99621	0.223883	2.09571	5.14215	5.51018	1.20692	0		58.66	2.22	14.01	8.8	0.219	2.05	5.03	5.39	1.1806		0.0146	0.0336	97.6079
DI-64-A-GLASS-5	DI-64	622943	3.01442e+06	RECALDEC	Antoniades et al.2018	post-caldera	60.1478	2.58941	13.6811	2.55884	7.31097	9.61345	0.194002	2.31416	4.8424	4.97493	1.38646	0		59	2.54	13.42	9.43	0.1903	2.27	4.75	4.88	1.36		0	0.0428	97.8831
DI-6B-A-1	DI-6B	616510	3014678	RECALDEC	Antoniades et al.2018	post-caldera	55.8412	2.32036	14.2376	2.70613	7.73181	10.1668	0.0891505	3.77567	7.35797	5.15974	0.780372	0		54.87	2.28	13.99	9.99	0.0876	3.71	7.23	5.07	0.7668	0	0.0052		97.9997
DI-6B-A-2	DI-6B	616510	3014678	RECALDEC	Antoniades et al.2018	post-caldera	56.3053	2.24899	14.2503	2.46104	8.20348	10.4179	0.192424	3.68108	6.89824	5.04257	0.716549	0		55.83	2.23	14.13	10.33	0.1908	3.65	6.84	5	0.7105	0	0		98.9114
DI-6B-B-1	DI-6B	616510	3014678	RECALDEC	Antoniades et al.2018	post-caldera	55.6396	2.10436	14.3278	2.82206	8.06302	10.6023	0.182545	3.75562	7.1085	5.21559	0.780928	0		55.26	2.09	14.23	10.53	0.1813	3.73	7.06	5.18	0.7756	0	0.0379		99.0748
DI-6B-B-2	DI-6B	616510	3014678	RECALDEC	Antoniades et al.2018	post-caldera	55.5839	2.58483	14.4993	2.67411	7.64031	10.0465	0.214763	3.60462	7.23954	5.27063	0.688009	0		55.05	2.56	14.36	9.95	0.2127	3.57	7.17	5.22	0.6814	0.0702	0.0512		98.8955
DI-6B-B-3	DI-6B	616510	3014678	RECALDEC	Antoniades et al.2018	post-caldera	55.4949	2.34415	13.9743	2.85999	8.1714	10.7448	0.182401	3.79289	7.33426	5.08066	0.765017	0		55.16	2.33	13.89	10.68	0.1813	3.77	7.29	5.05	0.7604	0	0		99.1118
DI-6B-B-4	DI-6B	616510	3014678	RECALDEC	Antoniades et al.2018	post-caldera	55.4306	2.47539	13.8902	2.88894	8.25412	10.8536	0.20685	3.72811	7.35601	5.03095	0.738808	0		55.31	2.47	13.86	10.83	0.2064	3.72	7.34	5.02	0.7372	0	0.0169		99.5105
DI-6B-B-5	DI-6B	616510	3014678	RECALDEC	Antoniades et al.2018	post-caldera	56.4832	2.5558	14.1796	2.57443	8.58144	10.8979	0.258749	3.79281	7.35048	3.45544	0.768069	0		55.25	2.5	13.87	10.66	0.2531	3.71	7.19	3.38	0.7513	0.0123	0.0599		97.6366
DI-6B-B-6	DI-6B	616510	3014678	RECALDEC	Antoniades et al.2018	post-caldera	55.9263	2.32773	13.9664	2.83929	8.11227	10.6671	0.249978	3.69401	6.90223	5.19186	0.789911	0		55.26	2.3	13.8	10.54	0.247	3.65	6.82	5.13	0.7805	0.0092	0		98.5368
DI-6B-C-1	DI-6B	616510	3014678	RECALDEC	Antoniades et al.2018	post-caldera	56.1093	2.4083	14.0855	2.55056	8.50185	10.7969	0.205616	3.62257	6.86062	4.85707	0.798584	0		55.45	2.38	13.92	10.67	0.2032	3.58	6.78	4.8	0.7892	0	0		98.5725
DI-6B-C-2	DI-6B	616510	3014678	RECALDEC	Antoniades et al.2018	post-caldera	56.0456	2.39052	14.0291	2.86332	8.18092	10.7574	0.208867	3.63643	6.8373	5.00389	0.803966	0		55.33	2.36	13.85	10.62	0.2062	3.59	6.75	4.94	0.7937	0	0.0212		98.4612
DI-6B-C-5	DI-6B	616510	3014678	RECALDEC	Antoniades et al.2018	post-caldera	55.3848	2.38797	14.0469	2.87361	8.21033	10.796	0.285352	3.72242	7.05354	5.22745	0.807595	0		55.2	2.38	14	10.76	0.2844	3.71	7.03	5.21	0.8049	0	0.0534		99.4327
DI-6B-C-6	DI-6B	616510	3014678	RECALDEC	Antoniades et al.2018	post-caldera	55.6352	2.38813	14.2478	2.80927	8.02649	10.5543	0.284551	3.49112	7.01259	5.26197	0.842826	0		54.98	2.36	14.08	10.43	0.2812	3.45	6.93	5.2	0.8329	0.0427	0		98.5868
DI-6B-F-1	DI-6B	616510	3014678	RECALDEC	Antoniades et al.2018	post-caldera	55.8992	2.32703	14.1139	2.80073	8.00209	10.5222	0.205588	3.79407	7.1632	4.98793	0.706202	0		55.25	2.3	13.95	10.4	0.2032	3.75	7.08	4.93	0.698	0.0213	0		98.5826
DI-6B-F-2	DI-6B	616510	3014678	RECALDEC	Antoniades et al.2018	post-caldera	55.4747	2.44948	14.2552	2.73353	7.81009	10.2698	0.20409	3.75453	7.14767	5.38083	0.789857	0		55.26	2.44	14.2	10.23	0.2033	3.74	7.12	5.36	0.7868	0.0519	0		99.3921
DI-6B-F-3	DI-6B	616510	3014678	RECALDEC	Antoniades et al.2018	post-caldera	55.8303	2.25956	14.0437	2.76174	7.89068	10.3757	0.24085	3.84023	7.32582	5.046	0.761156	0		55.1	2.23	13.86	10.24	0.2377	3.79	7.23	4.98	0.7512	0	0		98.419
DI-6B-F-4	DI-6B	616510	3014678	RECALDEC	Antoniades et al.2018	post-caldera	55.6877	2.25665	14.2786	2.80129	8.00367	10.5243	0.208867	3.71386	7.25569	5.0294	0.764226	0		55.03	2.23	14.11	10.4	0.2064	3.67	7.17	4.97	0.7552	0.0336	0		98.5753
DI-6B-G-1	DI-6B	616510	3014678	RECALDEC	Antoniades et al.2018	post-caldera	55.6156	2.19694	14.3353	2.80634	8.01812	10.5433	0.244773	3.51109	7.283	5.30676	0.682054	0		55.44	2.19	14.29	10.51	0.244	3.5	7.26	5.29	0.6799	0	0		99.404
DI-6B-G-2	DI-6B	616510	3014678	RECALDEC	Antoniades et al.2018	post-caldera	55.9227	2.42264	13.7889	2.9206	8.34457	10.9726	0.18614	3.745	6.94491	4.76453	0.960073	0		55.4	2.4	13.66	10.87	0.1844	3.71	6.88	4.72	0.9511	0.1007	0.0188		98.8951
DI-18-B-2	DI-18	615927	3016139	RECALDEC	Antoniades et al.2018	pre-caldera	53.1504	1.85455	14.6559	2.34444	7.81479	9.92434	0.216531	5.87441	9.75393	3.95971	0.375321	0		53.02	1.85	14.62	9.9	0.216	5.86	9.73	3.95	0.3744	0	0.0475		99.5679
DI-18-B-2	DI-18	615927	3016139	RECALDEC	Antoniades et al.2018	pre-caldera	53.1504	1.85455	14.6559	2.34444	7.81479	9.92434	0.216531	5.87441	9.75393	3.95971	0.375321	0		53.02	1.85	14.62	9.9	0.216	5.86	9.73	3.95	0.3744	0	0.0475		99.5679
DI-18-C-1	DI-18	615927	3016139	RECALDEC	Antoniades et al.2018	pre-caldera	52.8875	2.08567	14.5292	2.33974	7.79912	9.90444	0.134712	5.8943	9.92459	4.01014	0.395069	0		52.49	2.07	14.42	9.83	0.1337	5.85	9.85	3.98	0.3921	0.0335	0.0085		99.0579
DI-18-C-1	DI-18	615927	3016139	RECALDEC	Antoniades et al.2018	pre-caldera	52.8875	2.08567	14.5292	2.33974	7.79912	9.90444	0.134712	5.8943	9.92459	4.01014	0.395069	0		52.49	2.07	14.42	9.83	0.1337	5.85	9.85	3.98	0.3921	0.0335	0.0085		99.0579
DI-18-F-1	DI-18	615927	3016139	RECALDEC	Antoniades et al.2018	pre-caldera	53.1762	2.05256	14.5782	2.39837	7.99456	10.1526	0.250312	5.61699	9.7221	3.78471	0.42603	0		53.11	2.05	14.56	10.14	0.25	5.61	9.71	3.78	0.4255	0.0602	0.0592		99.755
DI-18-F-1	DI-18	615927	3016139	RECALDEC	Antoniades et al.2018	pre-caldera	53.1762	2.05256	14.5782	2.39837	7.99456	10.1526	0.250312	5.61699	9.7221	3.78471	0.42603	0		53.11	2.05	14.56	10.14	0.25	5.61	9.71	3.78	0.4255	0.0602	0.0592		99.755
DI-18-F-2	DI-18	615927	3016139	RECALDEC	Antoniades et al.2018	pre-caldera	53.0911	2.03042	14.403	2.40533	8.01778	10.1821	0.229248	5.87122	9.53199	4.00083	0.419087	0		53.08	2.03	14.4	10.18	0.2292	5.87	9.53	4	0.419	0.0668	0.0719		99.877
DI-18-F-2	DI-18	615927	3016139	RECALDEC	Antoniades et al.2018	pre-caldera	53.0911	2.03042	14.403	2.40533	8.01778	10.1821	0.229248	5.87122	9.53199	4.00083	0.419087	0		53.08	2.03	14.4	10.18	0.2292	5.87	9.53	4	0.419	0.0668	0.0719		99.877
DI-18-F-3	DI-18	615927	3016139	RECALDEC	Antoniades et al.2018	pre-caldera	53.1389	2.07896	14.382	2.39863	7.99543	10.1537	0.223463	5.71462	9.76206	3.89679	0.409163	0		52.91	2.07	14.32	10.11	0.2225	5.69	9.72	3.88	0.4074	0.0333	0.0555		99.4188
DI-18-F-3	DI-18	615927	3016139	RECALDEC	Antoniades et al.2018	pre-caldera	53.1389	2.07896	14.382	2.39863	7.99543	10.1537	0.223463	5.71462	9.76206	3.89679	0.409163	0		52.91	2.07	14.32	10.11	0.2225	5.69	9.72	3.88	0.4074	0.0333	0.0555		99.4188
DI-18-G-1	DI-18	615927	3016139	RECALDEC	Antoniades et al.2018	pre-caldera	53.6628	2.12054	14.2553	2.60295	8.67651	11.0187	0.232244	5.42817	9.14165	3.32792	0.551948	0		52.89	2.09	14.05	10.86	0.2289	5.35	9.01	3.28	0.544	0.0834	0.0532		98.4395
DI-18-G-1	DI-18	615927	3016139	RECALDEC	Antoniades et al.2018	pre-caldera	53.6628	2.12054	14.2553	2.60295	8.67651	11.0187	0.232244	5.42817	9.14165	3.32792	0.551948	0		52.89	2.09	14.05	10.86	0.2289	5.35	9.01	3.28	0.544	0.0834	0.0532		98.4395
DI-18-G-2	DI-18	615927	3016139	RECALDEC	Antoniades et al.2018	pre-caldera	52.9873	2.12999	14.4355	2.45862	8.1954	10.4077	0.231271	5.66315	9.91304	3.52307	0.462642	0		52.49	2.11	14.3	10.31	0.2291	5.61	9.82	3.49	0.4583	0.0033	0		98.8208
DI-18-G-2	DI-18	615927	3016139	RECALDEC	Antoniades et al.2018	pre-caldera	52.9873	2.12999	14.4355	2.45862	8.1954	10.4077	0.231271	5.66315	9.91304	3.52307	0.462642	0		52.49	2.11	14.3	10.31	0.2291	5.61	9.82	3.49	0.4583	0.0033	0		98.8208
DI-18-G-3	DI-18	615927	3016139	RECALDEC	Antoniades et al.2018	pre-caldera	53.5335	1.9649	14.1353	2.53873	8.46243	10.7468	0.219247	5.40348	9.35333	3.89973	0.489421	0		53.4	1.96	14.1	10.72	0.2187	5.39	9.33	3.89	0.4882	0.0066	0.0174		99.521
DI-18-G-3	DI-18	615927	3016139	RECALDEC	Antoniades et al.2018	pre-caldera	53.5335	1.9649	14.1353	2.53873	8.46243	10.7468	0.219247	5.40348	9.35333	3.89973	0.489421	0		53.4	1.96	14.1	10.72	0.2187	5.39	9.33	3.89	0.4882	0.0066	0.0174		99.521
DI-1SUP-a-GLASS1	DI-1SUP	618127	301462	RECALDEC	Antoniades et al.2018	post-caldera	58.5472	2.55132	13.4431	3.05898	7.64746	10.4	0.218553	2.70501	5.60471	5.01042	1.21326	0		57.14	2.49	13.12	10.15	0.2133	2.64	5.47	4.89	1.1841		0.0259	0.066	97.3894
DI-1SUP-a-GLASS2	DI-1SUP	618127	301462	RECALDEC	Antoniades et al.2018	post-caldera	58.3408	2.51214	13.3879	3.03672	7.5918	10.3243	0.221191	2.9104	5.57572	5.18767	1.23565	0		57.13	2.46	13.11	10.11	0.2166	2.85	5.46	5.08	1.21		0	0.0612	97.6879
DI-1SUP-a-GLASS3	DI-1SUP	618127	301462	RECALDEC	Antoniades et al.2018	post-caldera	58.5883	2.48334	13.3569	3.08405	7.71013	10.4852	0.173629	2.73882	5.53896	5.03821	1.28766	0		57.33	2.43	13.07	10.26	0.1699	2.68	5.42	4.93	1.26		0.0992	0.0562	97.7054
DI-1SUP-a-GLASS4	DI-1SUP	618127	301462	RECALDEC	Antoniades et al.2018	post-caldera	58.5202	2.48478	13.2726	3.02269	7.55672	10.2766	0.210951	2.8529	5.59331	5.25587	1.23002	0		57.23	2.43	12.98	10.05	0.2063	2.79	5.47	5.14	1.2029		0	0.0734	97.5727
DI-1SUP-b-GLASS1	DI-1SUP	618127	301462	RECALDEC	Antoniades et al.2018	post-caldera	58.4056	2.48666	13.2039	3.09489	7.73723	10.522	0.235616	2.78464	5.51791	5.38433	1.1492	0		56.84	2.42	12.85	10.24	0.2293	2.71	5.37	5.24	1.1184		0.0011	0.0829	97.1018
DI-1SUP-b-GLASS2	DI-1SUP	618127	301462	RECALDEC	Antoniades et al.2018	post-caldera	58.3176	2.47768	13.4532	3.11684	7.79211	10.5967	0.171083	2.81554	5.57989	5.12941	1.14669	0		56.96	2.42	13.14	10.35	0.1671	2.75	5.45	5.01	1.12		0	0.0536	97.4207
DI-1SUP-b-GLASS3	DI-1SUP	618127	301462	RECALDEC	Antoniades et al.2018	post-caldera	58.2461	2.5498	13.4044	3.06319	7.65797	10.4143	0.185757	2.82629	5.62185	5.30441	1.14024	0		56.88	2.49	13.09	10.17	0.1814	2.76	5.49	5.18	1.1135		0.0406	0.022	97.4176
DI-1SUP-b-GLASS4	DI-1SUP	618127	301462	RECALDEC	Antoniades et al.2018	post-caldera	58.0414	2.56065	13.2199	3.1173	7.79326	10.5982	0.213591	2.66226	5.59888	5.58872	1.20411	0		57.12	2.52	13.01	10.43	0.2102	2.62	5.51	5.5	1.185		0	0.0366	98.1418
DI-26-A-1	DI-26	621609	3012507	RECALDEC	Antoniades et al.2018	post-caldera	67.9192	1.235	12.8403	2.4496	4.8992	7.10338	0.186878	0.834522	1.73817	5.43554	2.46157	0		67.6	1.2292	12.78	7.07	0.186	0.8306	1.73	5.41	2.45	0	0		99.2859
DI-26-A-2	DI-26	621609	3012507	RECALDEC	Antoniades et al.2018	post-caldera	67.6111	1.39733	12.9408	2.43009	4.86018	7.04679	0.124196	0.903052	1.87447	5.50311	2.35561	0		67.45	1.394	12.91	7.03	0.1239	0.9009	1.87	5.49	2.35	0.0571	0		99.576
DI-26-A-3	DI-26	621609	3012507	RECALDEC	Antoniades et al.2018	post-caldera	67.0584	1.65687	12.1861	2.7131	5.42619	7.86747	0.237224	0.955292	1.98936	5.5782	2.19929	0		67.08	1.6574	12.19	7.87	0.2373	0.9556	1.99	5.58	2.2	0	0		99.7604
DI-26-D-1	DI-26	621609	3012507	RECALDEC	Antoniades et al.2018	post-caldera	66.719	1.3382	13.0399	2.46354	4.92708	7.1438	0.249329	0.859067	1.88154	6.39923	2.12302	0		66.31	1.33	12.96	7.1	0.2478	0.8538	1.87	6.36	2.11	0	0		99.1417
DI-26-D-3	DI-26	621609	3012507	RECALDEC	Antoniades et al.2018	post-caldera	67.3814	1.18107	13.022	2.4159	4.8318	7.00564	0.260541	0.701675	1.84731	6.06685	2.29147	0		66.75	1.17	12.9	6.94	0.2581	0.6951	1.83	6.01	2.27	0	0		98.8233
	Project Reference
RECALDEC Project	CTM2009-05919-E
PEVOLDEC Project	CTM2011-13578-E
References
﻿Antoniades, D., Giralt, S., Geyer, A., Álvarez-Valero, A. M., Pla-Rabes, S., Granados, I., Liu, E. J., Toro, M., Smellie, J. L., & Oliva, M. (2018). The timing and widespread effects of the largest Holocene volcanic eruption in Antarctica. Scientific Reports, 8(1), 17279. https://doi.org/10.1038/s41598-018-35460-x
